# Supplementary material for: Synthetic access to diverse thiazetidines via a one-pot microwave assisted telescopic approach and their interaction with biomolecules
Source: Royal Society of Chemistry journal article supplement (doi:10.1039/d4ob00075g), 2024-01-01
Supplement: d4ob00075g1.pdf [file d4ob00075g1.pdf]

## Supporting Information

### Synthetic Access to Diverse Thiazetidines via One-Pot Microwave Assisted Telescopic Approach and its Interaction with Biomolecules

Ramdas Nishanth Rao,<sup>a</sup> Soumyadip Das,<sup>a</sup> Kezia Jacob,<sup>a</sup> Mohammed Mujahid Alam,<sup>c</sup>  
Balamurali MM,<sup>d\*</sup> Kaushik Chanda<sup>ab\*</sup>

<sup>a</sup>Department of Chemistry, School of Advanced Sciences, Vellore Institute of Technology,  
Vellore 632014, India

<sup>b</sup>Department of Chemistry, Rabindranath Tagore University, Hojai 782435, Assam, India

<sup>c</sup>Department of Chemistry, College of Science, King Khalid University, P.O. Box 9004,  
Abha 61413, Saudi Arabia

<sup>d</sup>Chemistry Division, School of Advanced Sciences, Vellore Institute of Technology,  
Chennai, Tamil Nadu, India, 600027

Email: [chandakaushik1@gmail.com](mailto:chandakaushik1@gmail.com)  
[mmbala@gmail.com](mailto:mmbala@gmail.com)

#### Contents

|                                                                                                          |              |
|----------------------------------------------------------------------------------------------------------|--------------|
| <b>1 Spectral Data of Synthesised Compound.....</b>                                                      | <b>2-37</b>  |
| <b>2. Single crystal data for compound 4g.....</b>                                                       | <b>38-50</b> |
| <b>3. Comparison of structural parameters obtained from crystal structure and<br/>Computed data.....</b> | <b>51</b>    |
| <b>3. Experimental procedure for interaction with biomolecules.....</b>                                  | <b>52-55</b> |

Signature SIF VIT VELLORE  
NR-118-TD-A

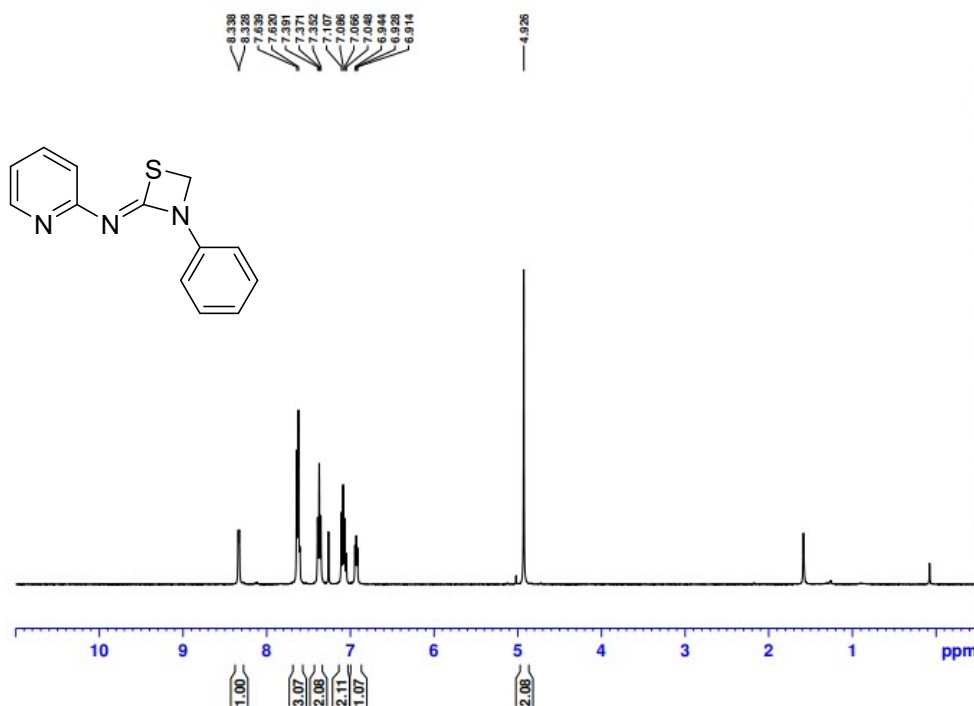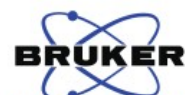

Current Data Parameters  
NAME 5(1,1)  
EXPNO 35  
PROCNO 1

F2 - Acquisition Parameter  
Date\_ 20180122  
Time\_ 17.15 h  
INSTRUM spect  
PROBHD Z108618\_0505 (  
PULPROG zg30  
TD 65536  
SOLVENT CDCl3  
NS 16  
DS 2  
SWH 8012.820 Hz  
FIDRES 0.244532 Hz  
AQ 4.0894465 sec  
RG 156.91  
DW 62.400 usec  
DE 6.50 usec  
TE 297.0 K  
D1 1.00000000 sec  
TD0 1  
SFO1 400.2604716 MH  
NUC1 1H  
P1 14.25 usec  
PLW1 14.00000000 W

F2 - Processing parameter  
SI 65536  
SF 400.2580093 MHz  
WDW EM  
SSB 0  
LB 0.30 Hz  
GB 0  
PC 1.00

Signature SIF VIT VELLORE  
NR-118-TD-A

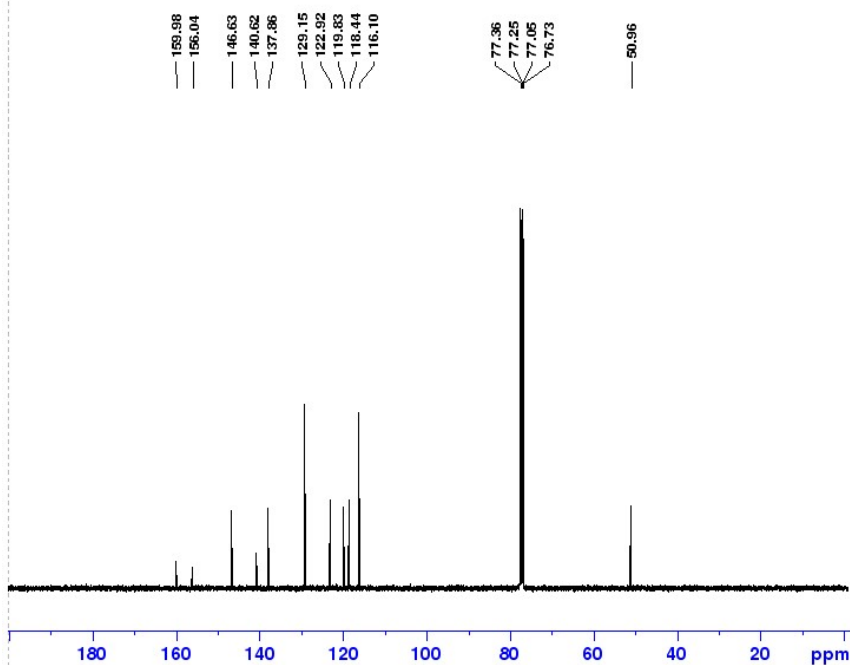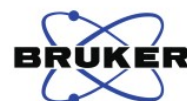

Current Data Parameters  
NAME 2-Amino pyridine with I  
EXPNO 36  
PROCNO 1

F2 - Acquisition Parameters  
Date\_ 20180122  
Time\_ 17.45 h  
INSTRUM spect  
PROBHD Z108618\_0505 (  
PULPROG zgpg30  
TD 65536  
SOLVENT CDCl3  
NS 512  
DS 4  
SWH 24038.461 Hz  
FIDRES 0.733596 Hz  
AQ 1.3631488 sec  
RG 88.69  
DW 20.800 usec  
DE 6.50 usec  
TE 297.8 K  
D1 2.00000000 sec  
D11 0.03000000 sec  
TD0 1  
SFO1 100.6550186 MHz  
NUC1 13C  
P1 9.80 usec  
PLW1 58.00000000 W  
SFO2 400.2596010 MHz  
NUC2 1H  
CPDPRG[2] waltz16  
PCPD2 90.00 usec  
PLW2 14.00000000 W  
PLW12 0.35097000 W  
PLW13 0.17654000 W

F2 - Processing parameters  
SI 32768  
SF 100.6449542 MHz  
WDW EM  
SSB 0  
LB 1.00 Hz  
GB 0  
PC 1.40

<sup>1</sup>H and <sup>13</sup>C NMR spectra of compound 4a

TD-A

Scan: 32 TIC=7690288 Base=70.9%FS #Ions=1794 RT=78

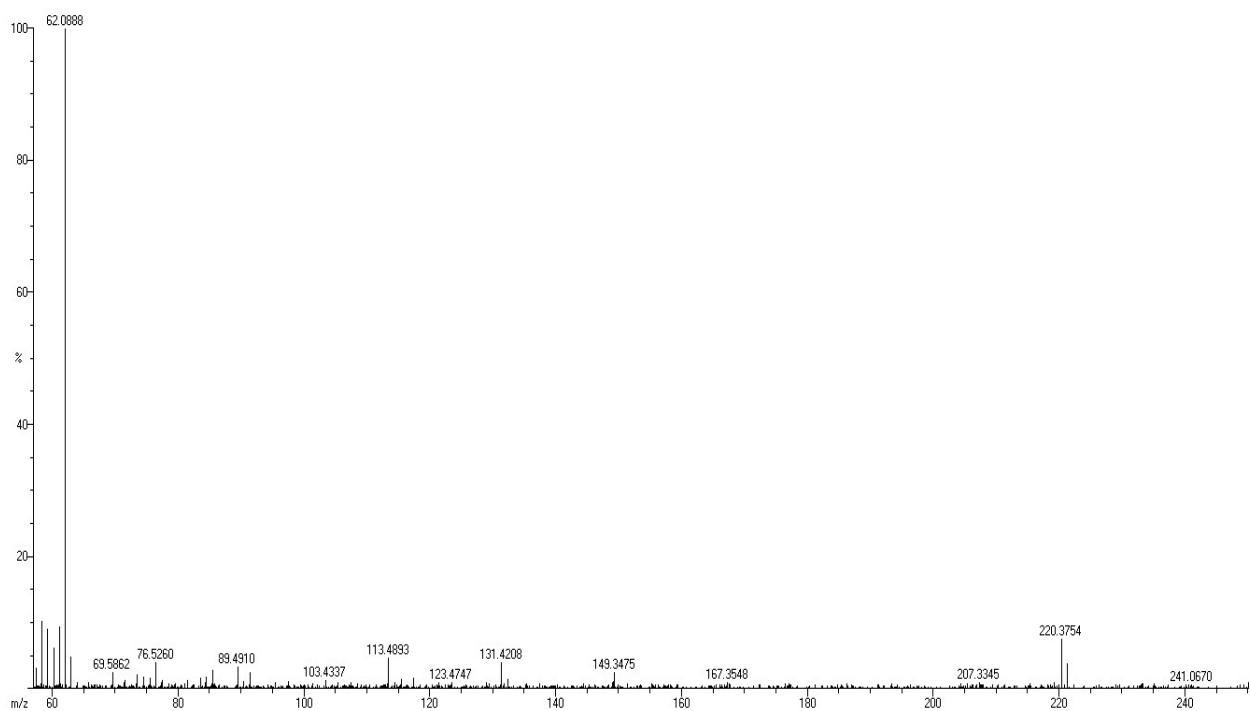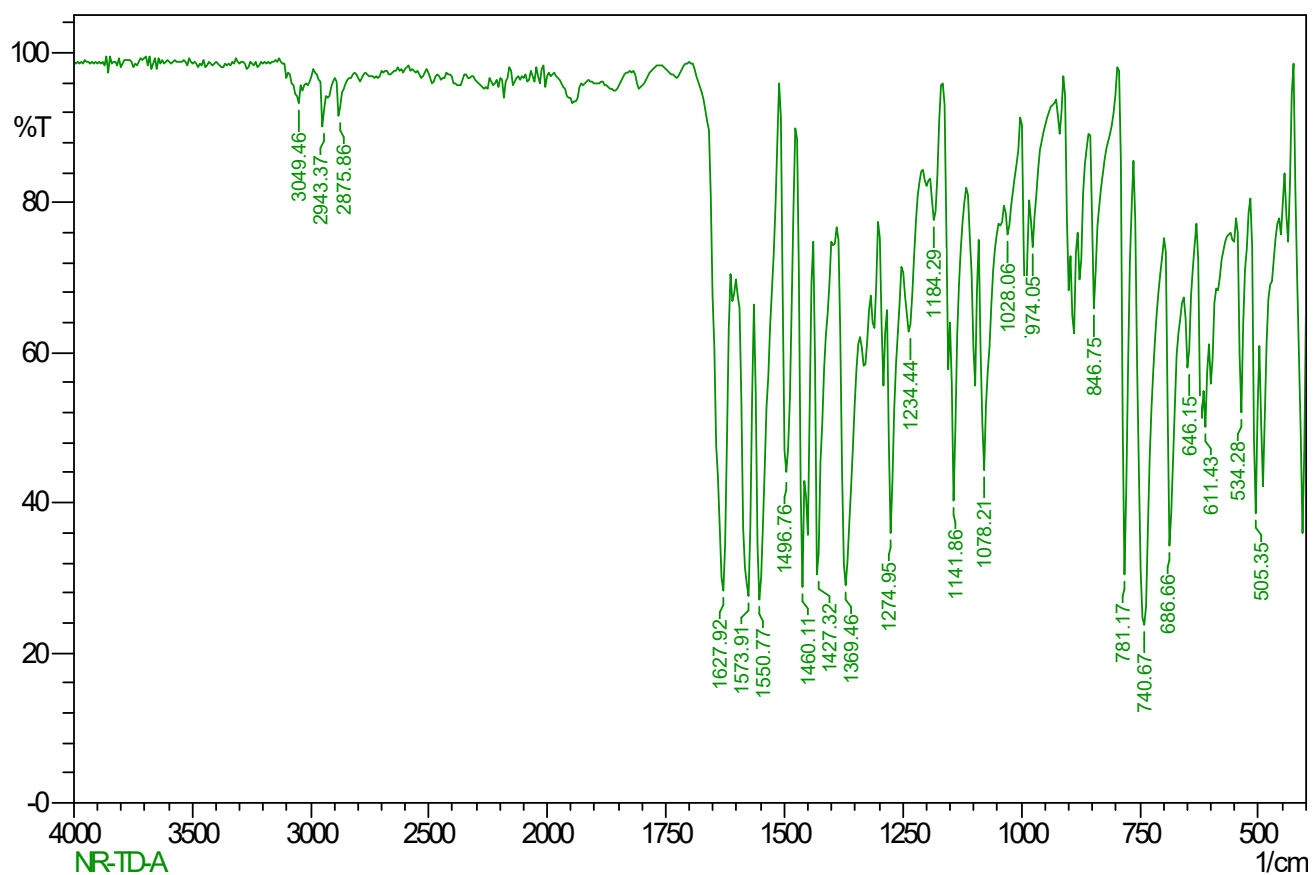

HRMS and IR spectra compound 4a

Signature SIF VIT VELLORE  
NR-TO0218-B

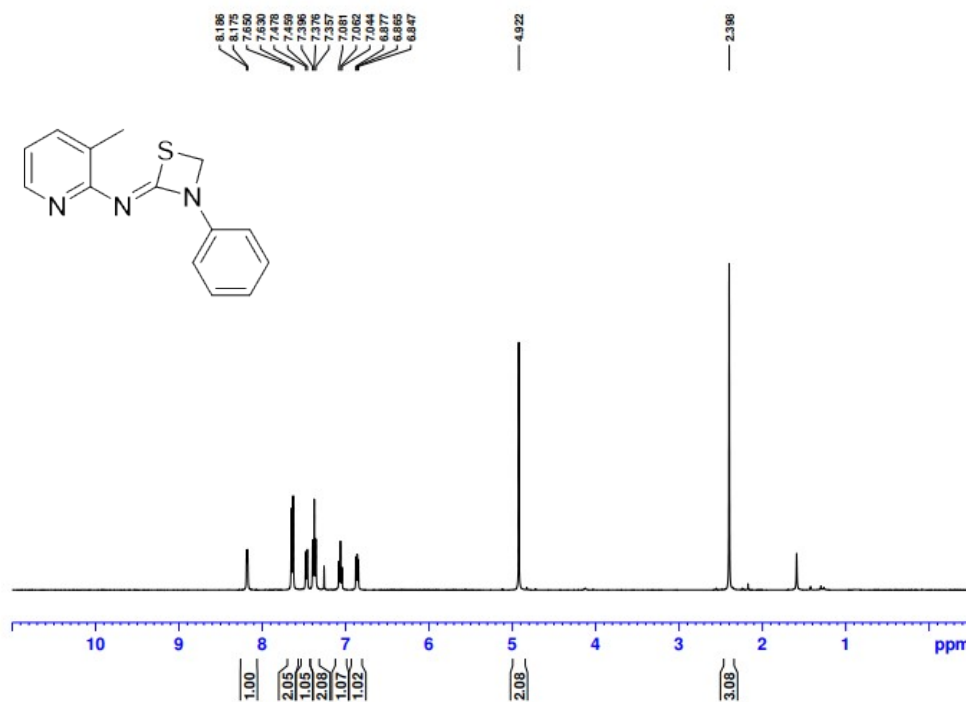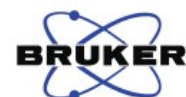

Current Data Parameters  
NAME 5(2,1)  
EXPNO 19  
PROCNO 1

F2 - Acquisition Parameter  
Date\_ 20180213  
Time 11.51 h  
INSTRUM spect  
PROBHD Z108618\_0505 (  
PULPROG zg30  
TD 65536  
SOLVENT CDCl3  
NS 16  
DS 2  
SWH 8012.820 Hz  
FIDRES 0.244532 Hz  
AQ 4.0894465 sec  
RG 112.69  
DW 62.400 usec  
DE 6.50 usec  
TE 297.0 K  
D1 1.00000000 sec  
TD0 1  
SFO1 400.2604716 MH:  
NUC1 1H  
P1 14.25 usec  
PLW1 14.00000000 W

F2 - Processing parameter:  
SI 65536  
SF 400.2580106 MHz  
WDW EM  
SSB 0  
LB 0.30 Hz  
GB 0  
PC 1.00

Signature SIF VIT VELLORE  
NR-TO0218-B

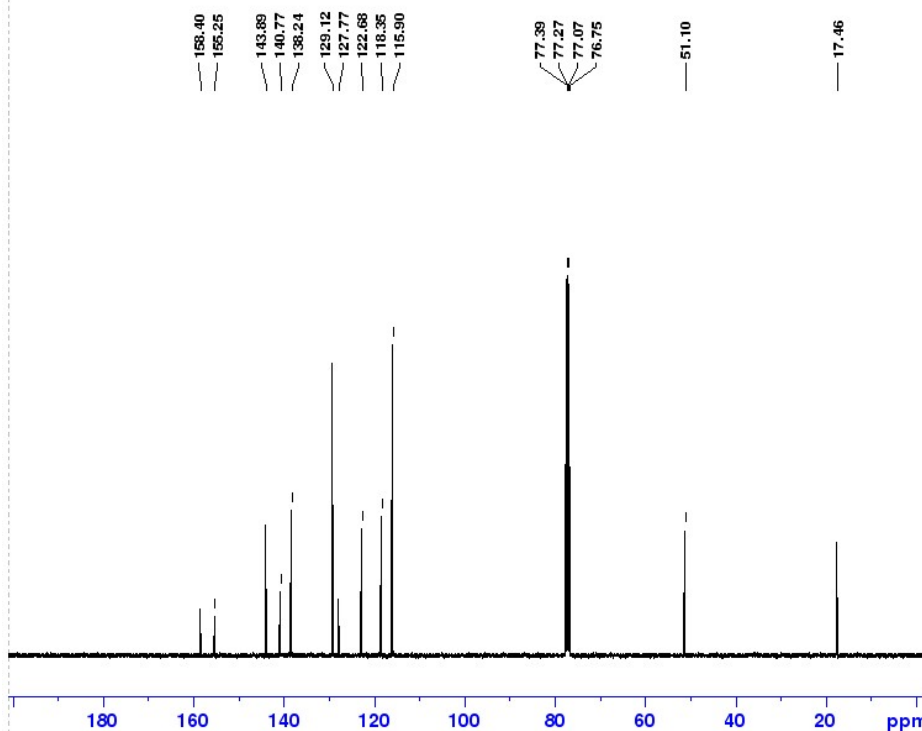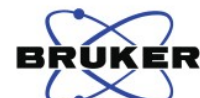

Current Data Parameters  
NAME 3-Methyl Amino pyridin  
EXPNO 20  
PROCNO 1

F2 - Acquisition Parameters  
Date\_ 20180213  
Time 12.22 h  
INSTRUM spect  
PROBHD Z108618\_0505 (  
PULPROG zgpg30  
TD 65536  
SOLVENT CDCl3  
NS 512  
DS 4  
SWH 24038.461 Hz  
FIDRES 0.733596 Hz  
AQ 1.3631488 sec  
RG 77.73  
DW 20.800 usec  
DE 6.50 usec  
TE 297.7 K  
D1 2.00000000 sec  
D11 0.03000000 sec  
TD0 1  
SFO1 100.6550186 MHz  
NUC1 13C  
P1 9.80 usec  
PLW1 58.00000000 W  
SFO2 400.2596010 MHz  
NUC2 1H  
CPDPRG[2] waltz16  
PCPD2 90.00 usec  
PLW2 14.00000000 W  
PLW12 0.35097000 W  
PLW13 0.17654000 W

F2 - Processing parameters  
SI 32768  
SF 100.6449542 MHz  
WDW EM  
SSB 0  
LB 1.00 Hz  
GB 0  
PC 1.40

<sup>1</sup>H and <sup>13</sup>C NMR spectra of compound 4b.

TD-8

Scan: 1 TIC=19002656 Base=100%FS #Ions=3414 RT=.02

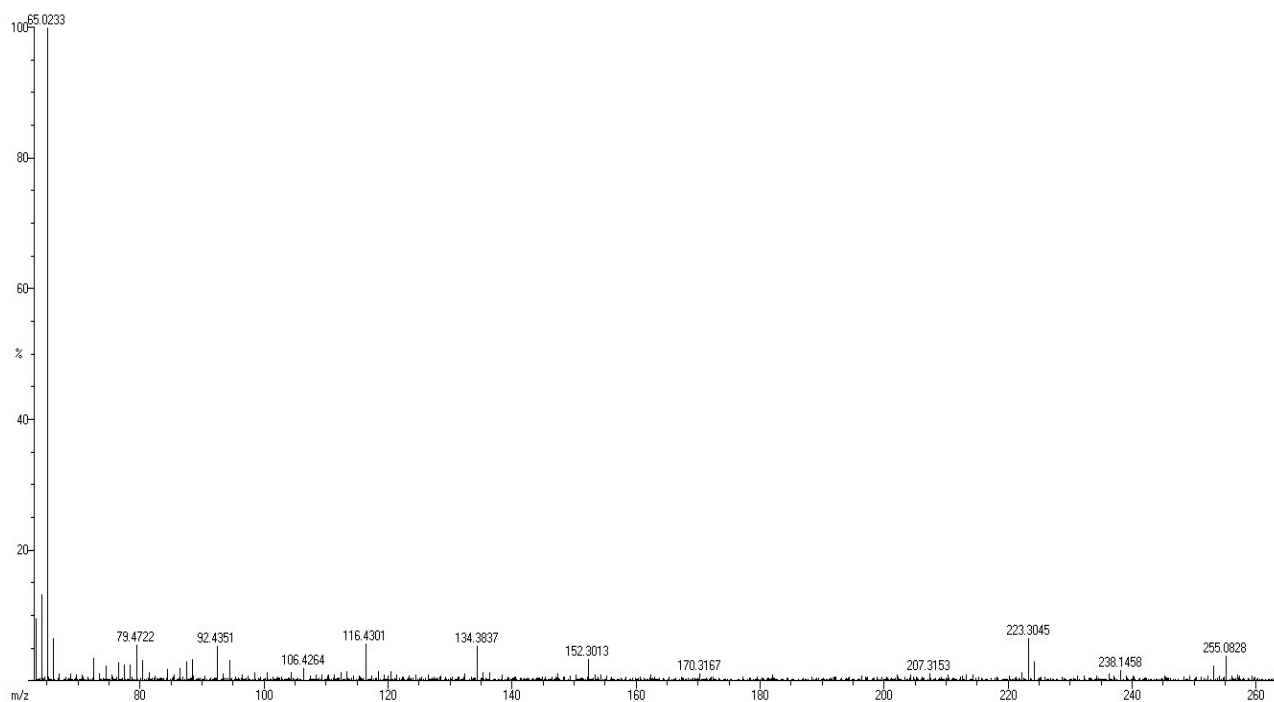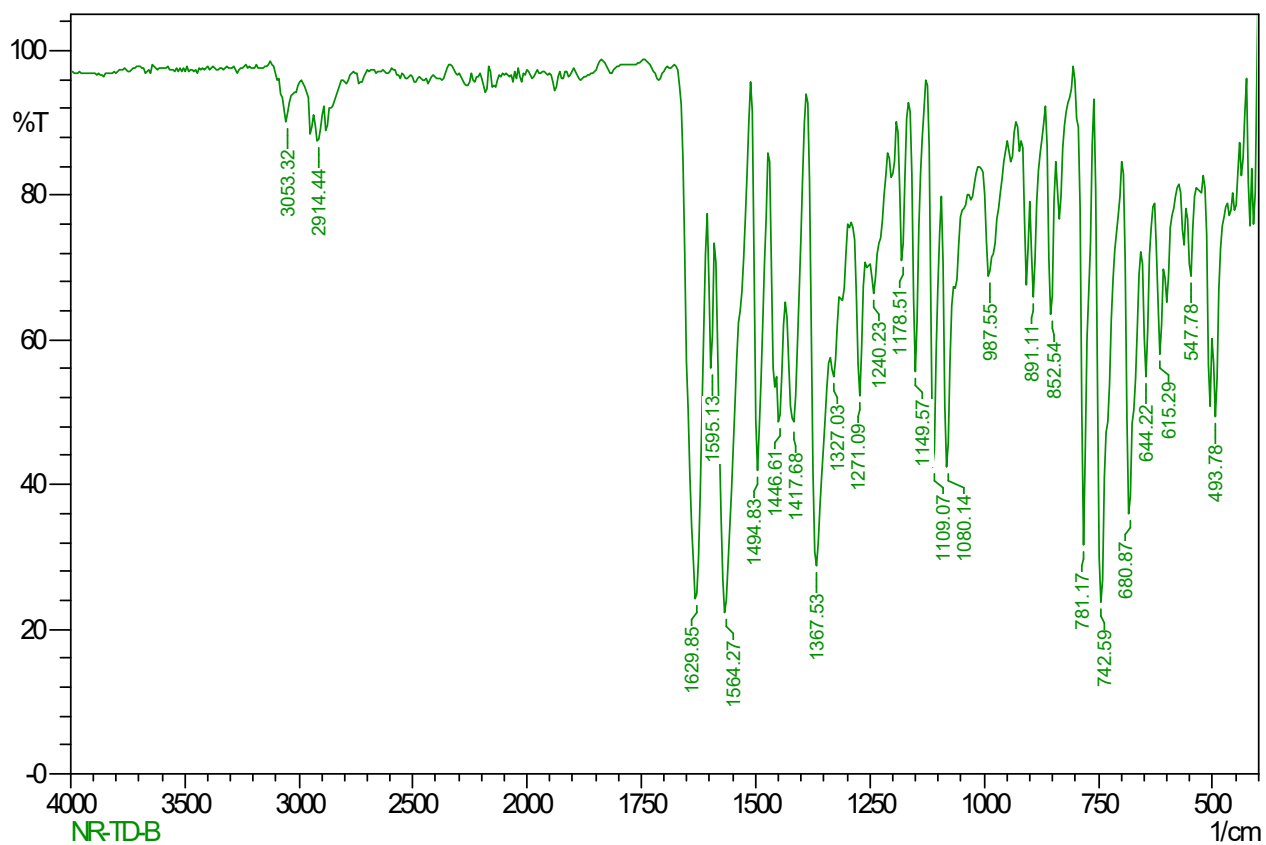

HRMS and IR spectra compound 4b

Signature SIF VIT VELLORE  
NR-318-TD-D1

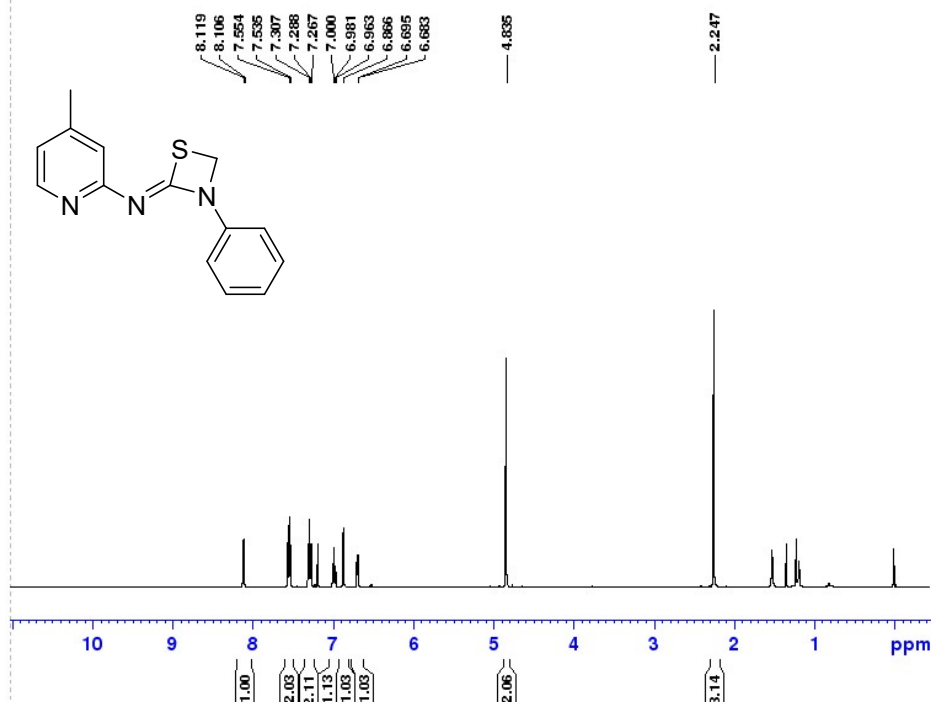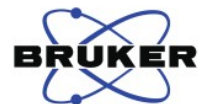

Current Data Parameters  
NAME 4-Methyl Amino Pyridi  
EXPNO 20  
PROCNO 1

F2 - Acquisition Parameters  
Date\_ 20180313  
Time 16.22 h  
INSTRUM spect  
PROBHD Z108618\_0505 (  
PULPROG zg30  
TD 65536  
SOLVENT CDCl3  
NS 16  
DS 2  
SWH 8012.820 Hz  
FIDRES 0.244532 Hz  
AQ 4.0894465 sec  
RG 156.91  
DW 62.400 usec  
DE 6.50 usec  
TE 298.4 K  
D1 1.00000000 sec  
TD0 1  
SFO1 400.2604716 MHz  
NUC1 1H  
P1 14.25 usec  
PLW1 14.00000000 W

F2 - Processing parameters  
SI 65536  
SF 400.2590401 MHz  
WDW EM  
SSB 0  
LB 0.30 Hz  
GB 0  
PC 1.00

Signature SIF VIT VELLORE  
NR-318-TD-D1

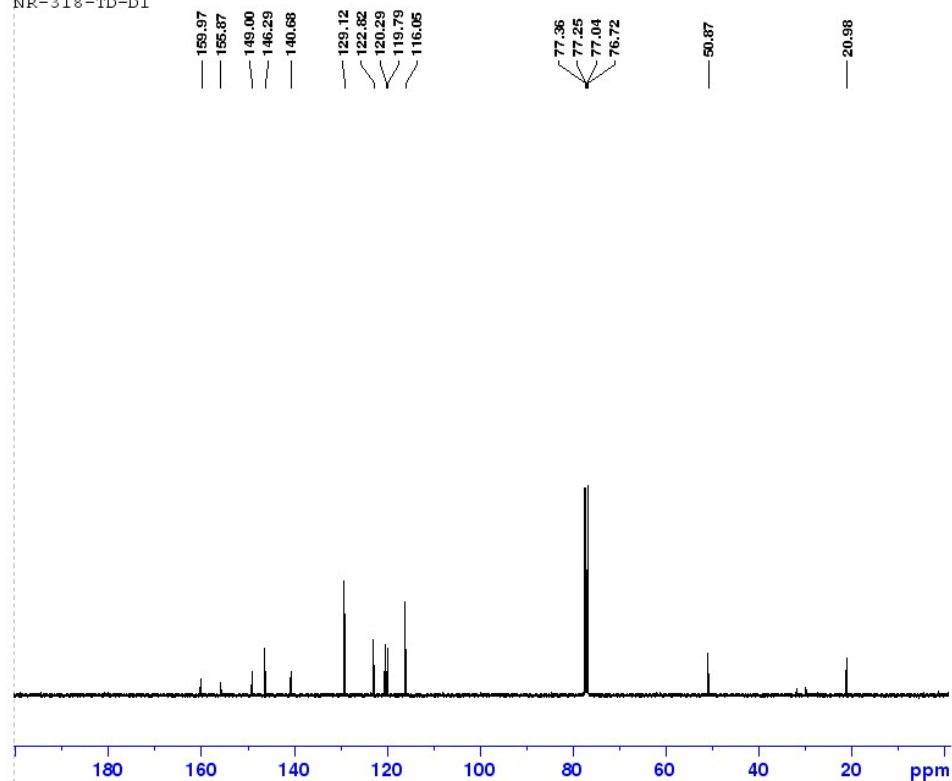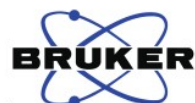

Current Data parameters  
NAME 4-Methyl Amino Pyridi  
EXPNO 21  
PROCNO 1

F2 - Acquisition Parameters  
Date\_ 20180313  
Time 16.52 h  
INSTRUM spect  
PROBHD Z108618\_0505 (  
PULPROG zgpg30  
TD 65536  
SOLVENT CDCl3  
NS 512  
DS 4  
SWH 24038.461 Hz  
FIDRES 0.733596 Hz  
AQ 1.3631488 sec  
RG 88.69  
DW 20.800 usec  
DE 6.50 usec  
TE 299.0 K  
D1 2.00000000 sec  
D11 0.03000000 sec  
TD0 1  
SFO1 100.6550186 MHz  
NUC1 13C  
P1 9.80 usec  
PLW1 58.00000000 W  
SFO2 400.2596010 MHz  
NUC2 1H  
CPDPRG[2] waltz16  
PCPD2 90.00 usec  
PLW2 14.00000000 W  
PLW12 0.35097000 W  
PLW13 0.17654000 W

F2 - Processing parameters  
SI 32768  
SF 100.6449542 MHz  
WDW EM  
SSB 0  
LB 1.00 Hz  
GB 0  
PC 1.40

<sup>1</sup>H and <sup>13</sup>C NMR spectra of compound 4c.

TD-C

Scan: 2 TIC=12455200 Base=100%FS #Ions=2484 RT= 03

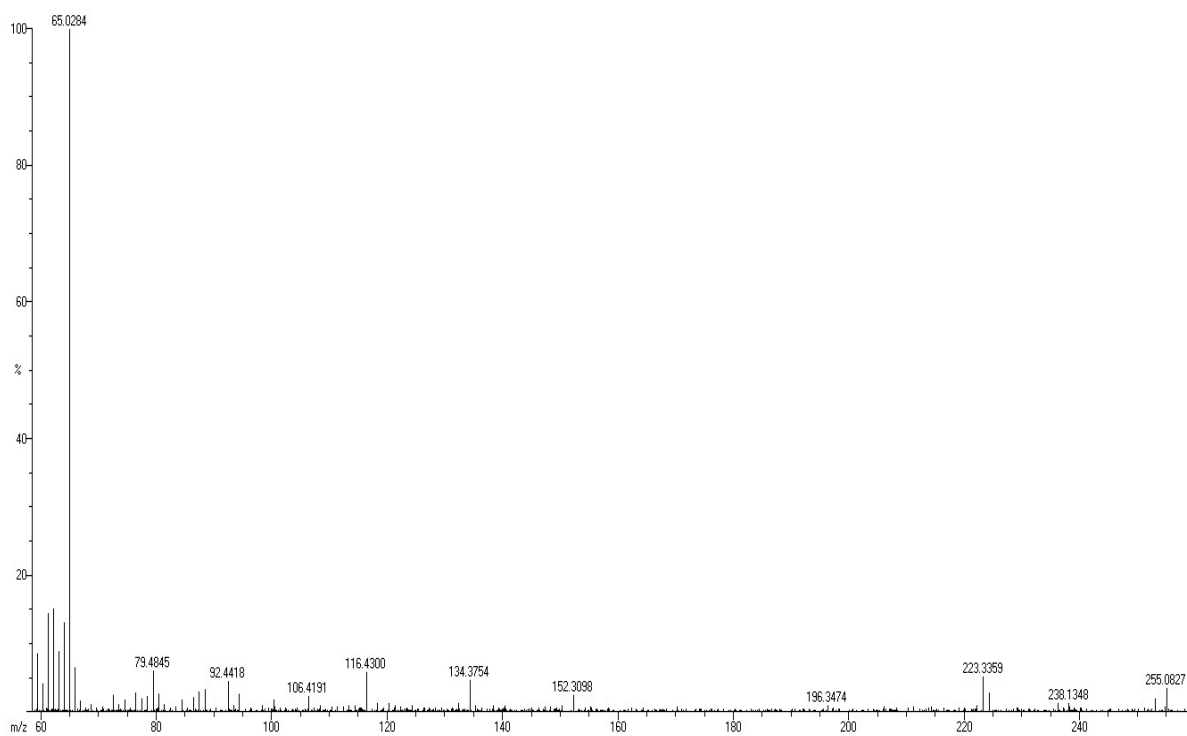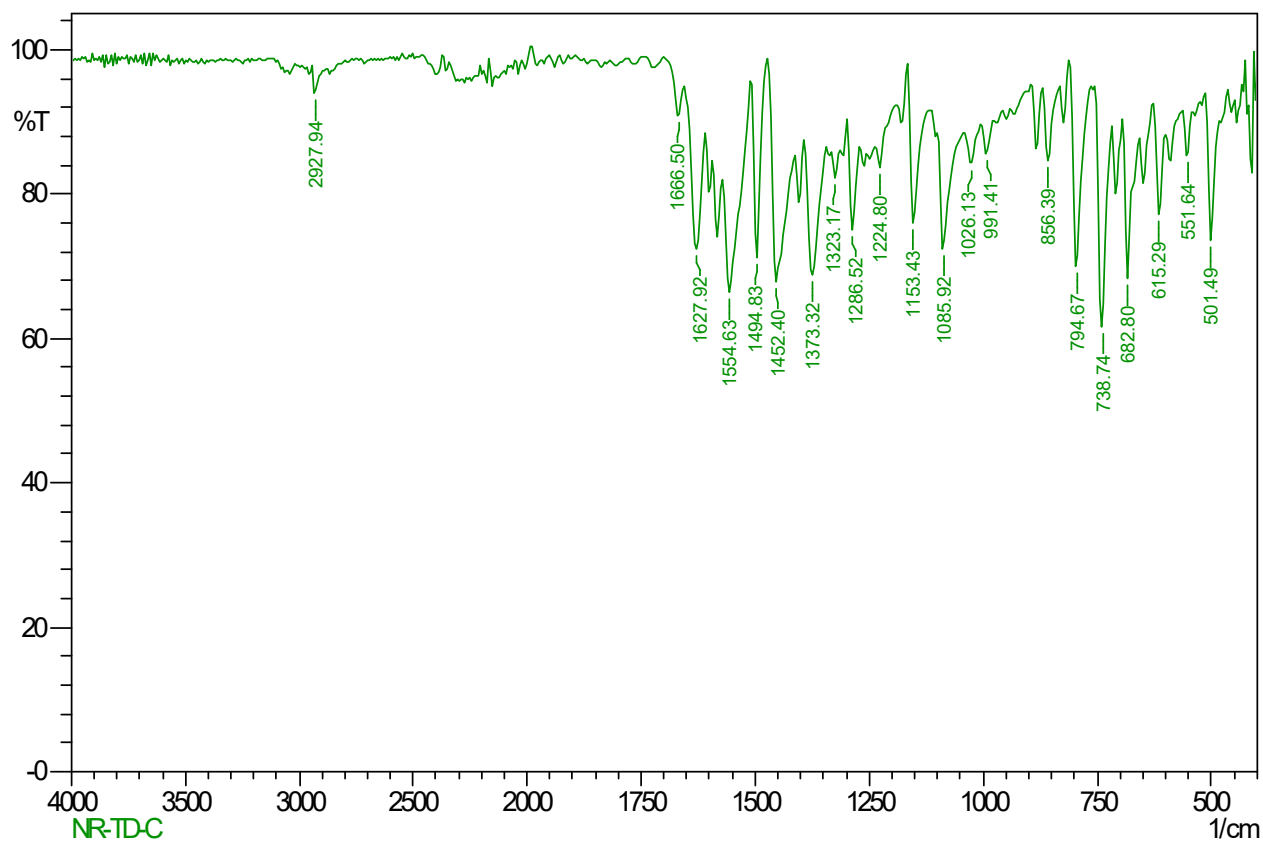

HRMS and IR spectra compound 4c.

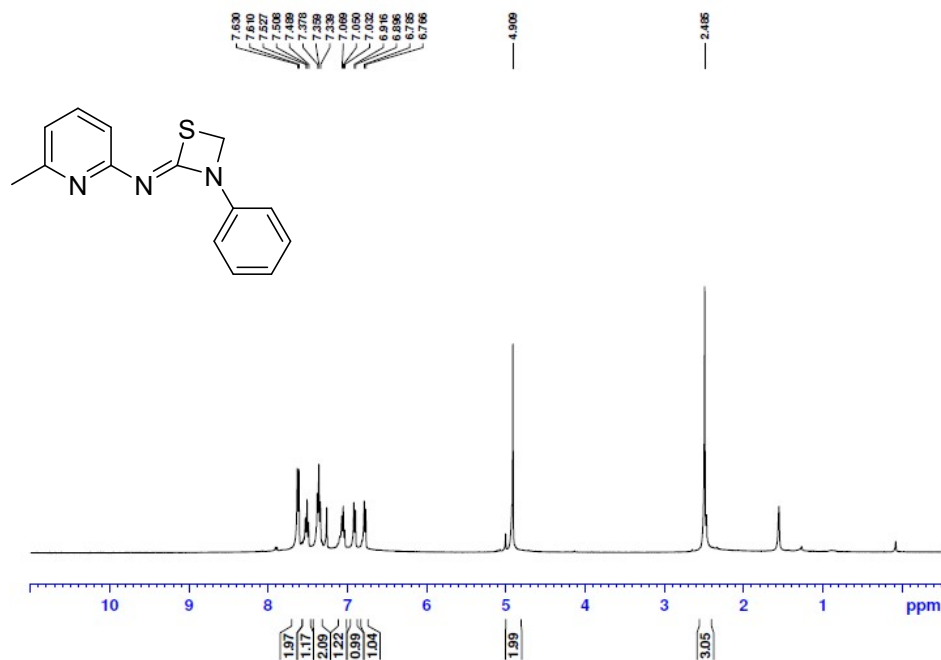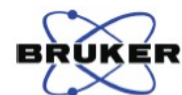

Current Data Parameters  
NAME 5(4,1)  
EXPNO 9  
PROCNO 1

F2 - Acquisition Parameter  
Date\_ 20180208  
Time 23.40 h  
INSTRUM spect  
PROBHD Z108618\_0505 (Zg30)  
PULPROG zg30  
TD 65536  
SOLVENT CDC13  
NS 16  
DS 2  
SWH 8012.820 Hz  
FIDRES 0.244532 Hz  
AQ 4.0894465 sec  
RG 175.97  
DW 62.400 usec  
DE 6.50 usec  
TE 306.2 K  
D1 1.00000000 sec  
TD0 1  
SFO1 400.2604716 MH  
NUC1 1H  
P1 14.25 usec  
PLW1 14.00000000 W

F2 - Processing parameter  
SI 65536  
SF 400.2580105 MHz  
WDW EM  
SSB 0  
LB 0.30 Hz  
GB 0  
PC 1.00

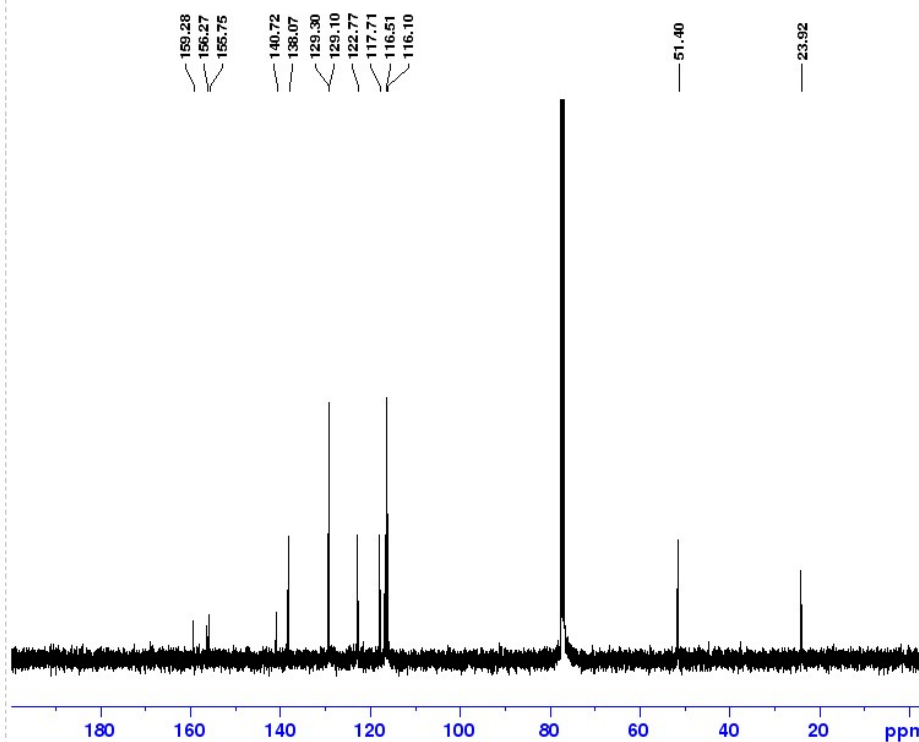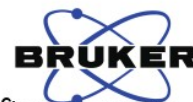

NAME 6-Methyl amino pyridin  
EXPNO 10  
PROCNO 1

F2 - Acquisition Parameters  
Date\_ 20180209  
Time 0.11 h  
INSTRUM spect  
PROBHD Z108618\_0505 (Zgpg30)  
PULPROG zgpg30  
TD 65536  
SOLVENT CDC13  
NS 512  
DS 4  
SWH 24038.461 Hz  
FIDRES 0.733596 Hz  
AQ 1.3631488 sec  
RG 199.6  
DW 20.800 usec  
DE 6.50 usec  
TE 305.1 K  
D1 2.00000000 sec  
D11 0.03000000 sec  
TD0 1  
SFO1 100.6550186 MHz  
NUC1 13C  
P1 9.80 usec  
PLW1 58.00000000 W  
SFO2 400.2596010 MHz  
NUC2 1H  
CPDPRG[2] waltz16  
PCPD2 90.00 usec  
PLW2 14.00000000 W  
PLW12 0.35097000 W  
PLW13 0.17654000 W

F2 - Processing parameters  
SI 32768  
SF 100.6449542 MHz  
WDW EM  
SSB 0  
LB 1.00 Hz  
GB 0  
PC 1.40

<sup>1</sup>H and <sup>13</sup>C NMR spectra of compound 4d.



NR-TD-K

Scan: 3415 TIC=2941168 Base=22.2%FS #Ions=582 RT=18.07

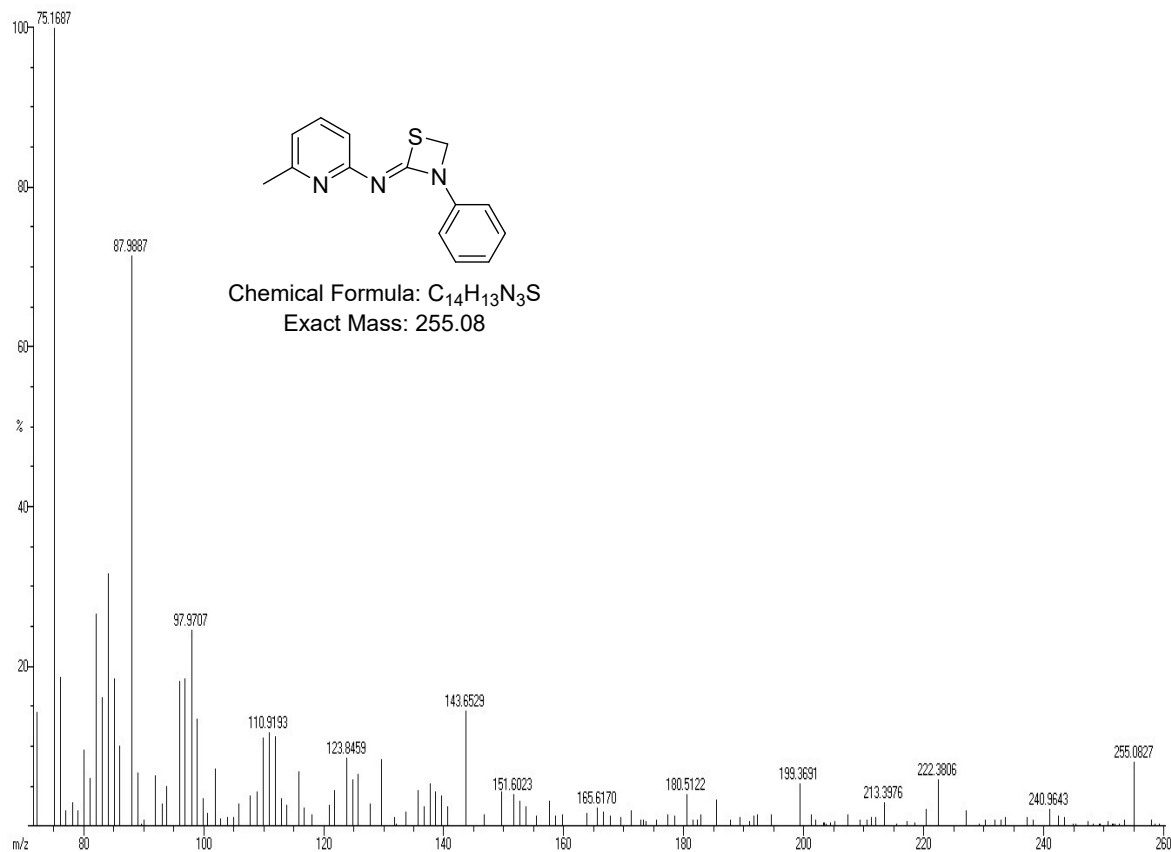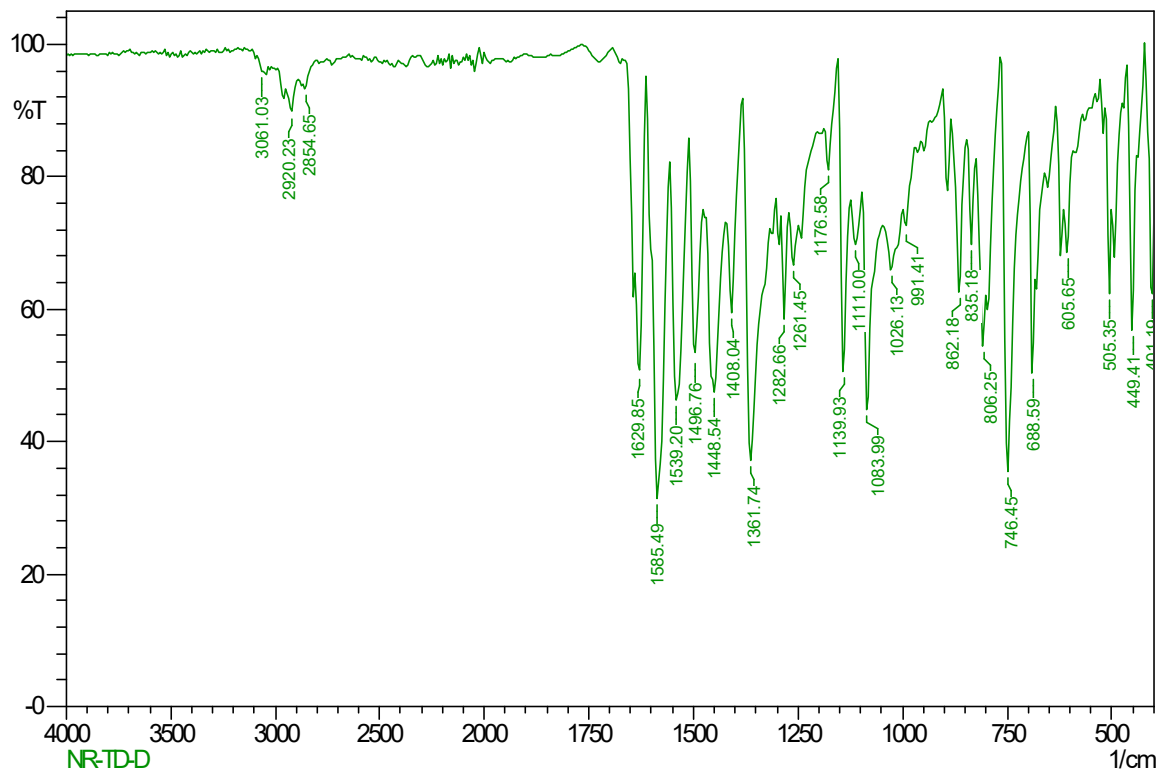

HRMS and IR spectra compound 4d

Signature SIF VIT VELLORE  
NR-318-TD-E

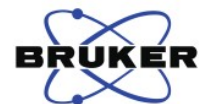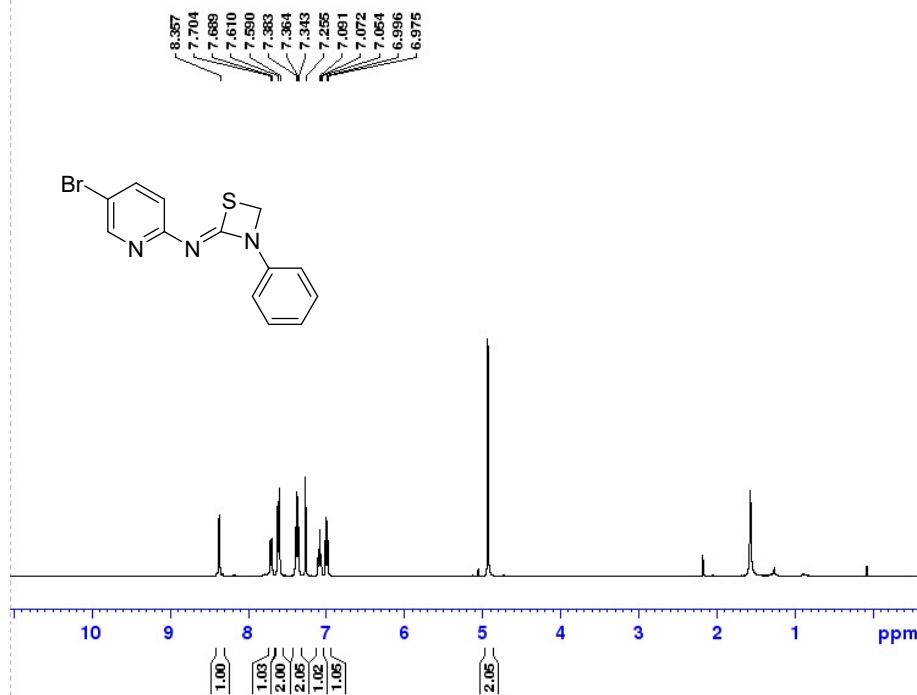

Current Data Parameters  
NAME 5-Bromo-Amino Pyridi  
EXPNO 24  
PROCNO 1

F2 - Acquisition Parameters  
Date\_ 20180315  
Time 19.04 h  
INSTRUM spect  
PROBHD Z108618\_0505 (  
PULPROG zg30  
TD 65536  
SOLVENT CDCl3  
NS 16  
DS 2  
SWH 8012.820 Hz  
FIDRES 0.244532 Hz  
AQ 4.0894465 sec  
RG 199.6  
DW 62.400 usec  
DE 6.50 usec  
TE 300.8 K  
D1 1.00000000 sec  
TD0 1  
SFO1 400.2604716 MHz  
NUC1 1H  
P1 14.25 usec  
PLW1 14.0000000 W

F2 - Processing parameters  
SI 65536  
SF 400.2580117 MHz  
WDW EM  
SSB 0  
LB 0.30 Hz  
GB 0  
PC 1.00

Signature SIF VIT VELLORE  
NR-318-TD-E

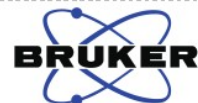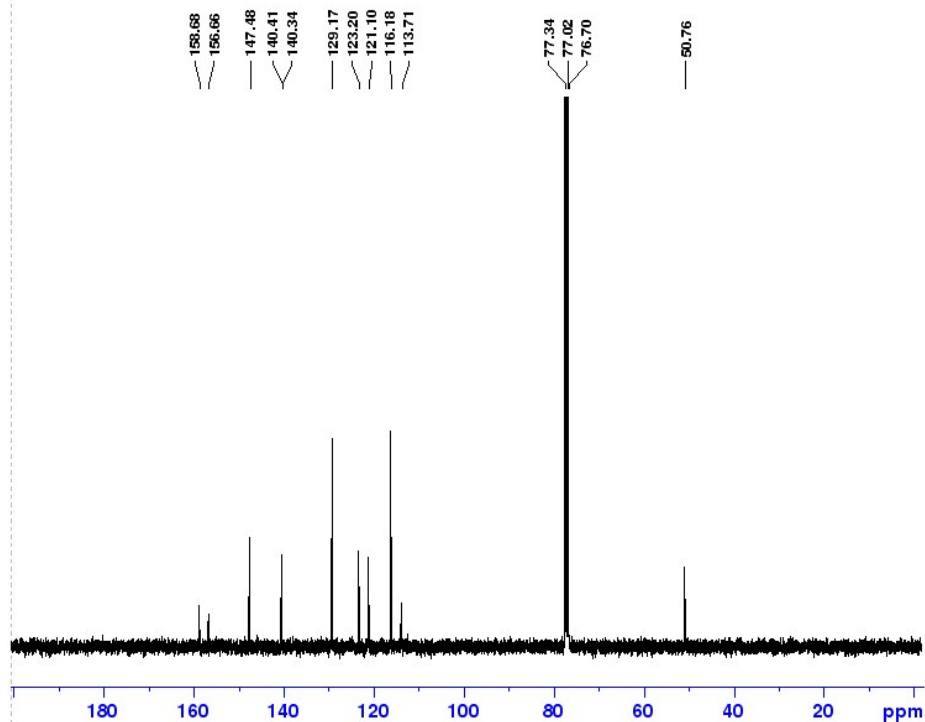

Current Data Parameters  
NAME 5-Bromo-Amino Pyridi  
EXPNO 25  
PROCNO 1

F2 - Acquisition Parameters  
Date\_ 20180315  
Time 19.34 h  
INSTRUM spect  
PROBHD Z108618\_0505 (  
PULPROG zgpg30  
TD 65536  
SOLVENT CDCl3  
NS 512  
DS 4  
SWH 24038.461 Hz  
FIDRES 0.733596 Hz  
AQ 1.3631488 sec  
RG 143.73  
DW 20.800 usec  
DE 6.50 usec  
TE 301.7 K  
D1 2.00000000 sec  
D11 0.03000000 sec  
TD0 1  
SFO1 100.6550186 MHz  
NUC1 13C  
P1 9.80 usec  
PLW1 58.0000000 W  
SFO2 400.2596010 MHz  
NUC2 1H  
CPDPRG[2] waltz16  
PCPD2 90.00 usec  
PLW2 14.0000000 W  
PLW12 0.35097000 W  
PLW13 0.17654000 W

F2 - Processing parameters  
SI 32768  
SF 100.6449542 MHz  
WDW EM  
SSB 0  
LB 1.00 Hz  
GB 0  
PC 1.40

<sup>1</sup>H and <sup>13</sup>C NMR spectra of compound 4e

NR-TD-E  
Scan: 3498 TIC=1560736 Base=4.2%FS #Ions=598 RT=18.49

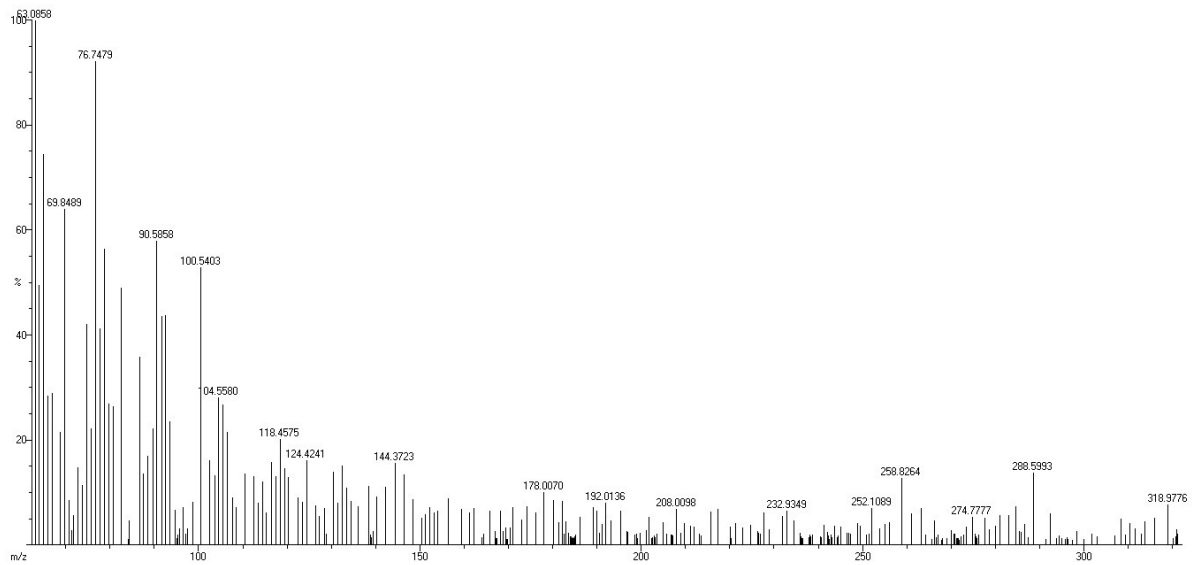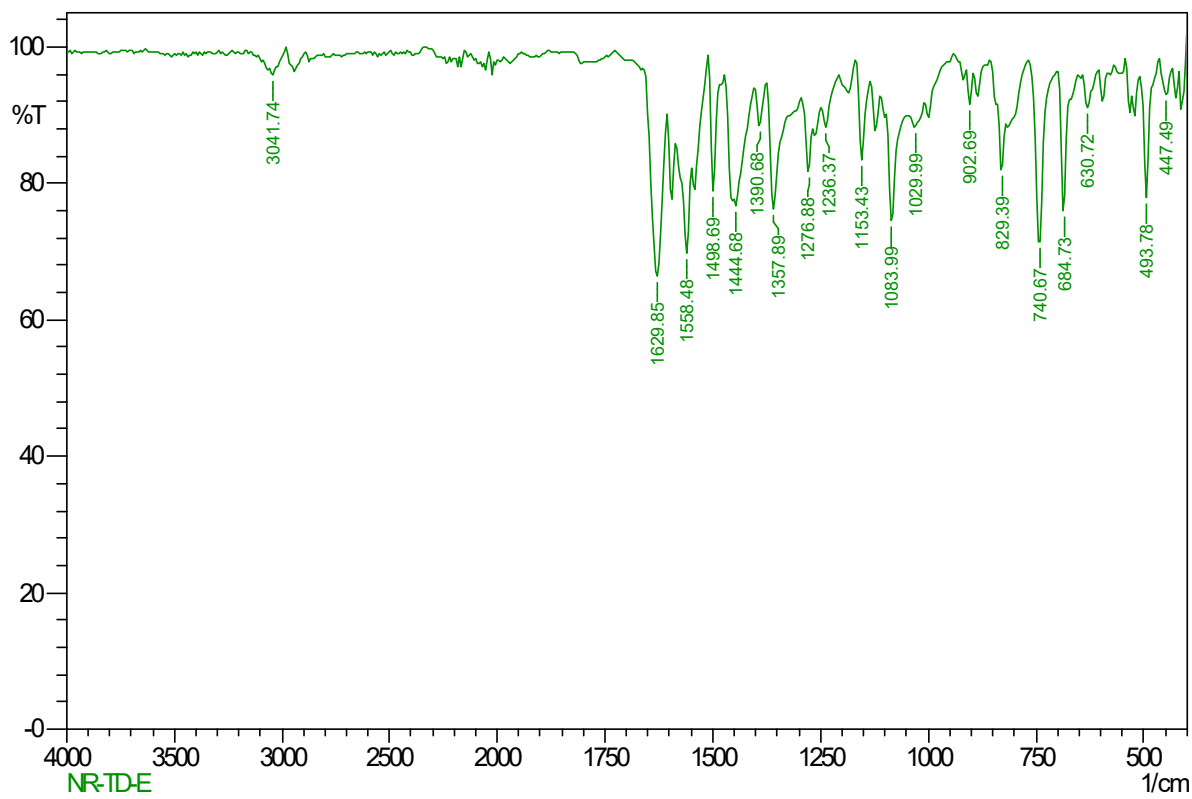

HRMS and IR spectra compound 4e

Signature SIF VIT VELLORE  
NR-318-TO-F

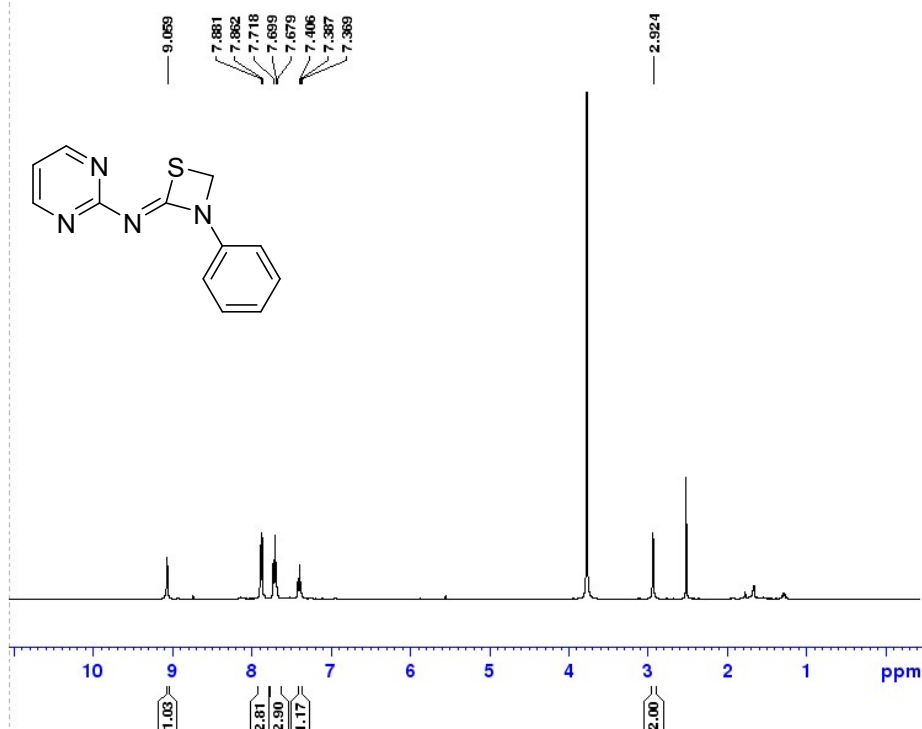

Signature SIF VIT VELLORE  
NR-318-TO-F

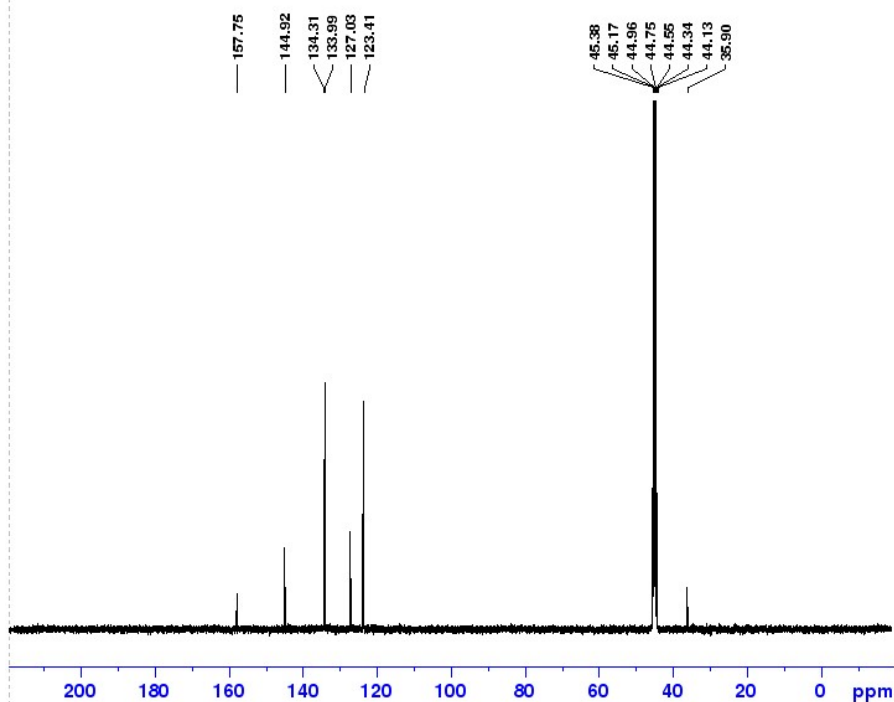

<sup>1</sup>H and <sup>13</sup>C NMR spectra of compound 4f

NR-TD.F

Scan: 3901 TIC=1497216 Base=4.2%FS #Ions=573 RT=18.5

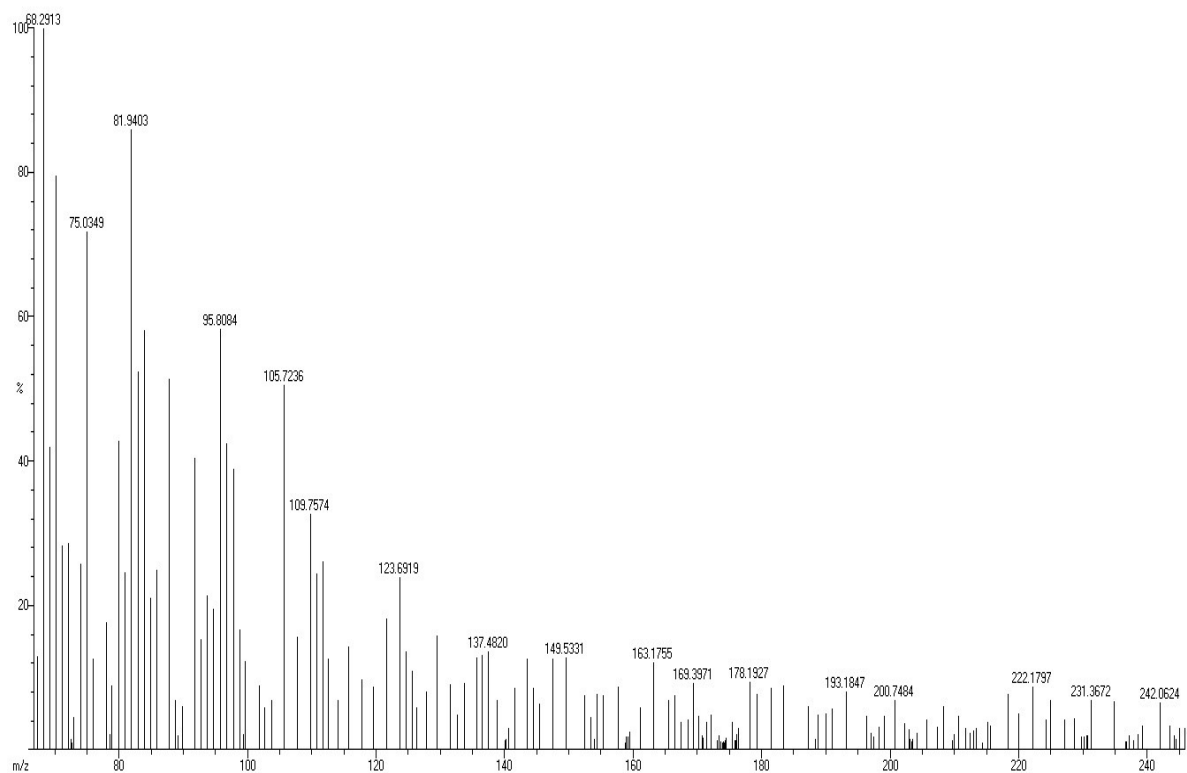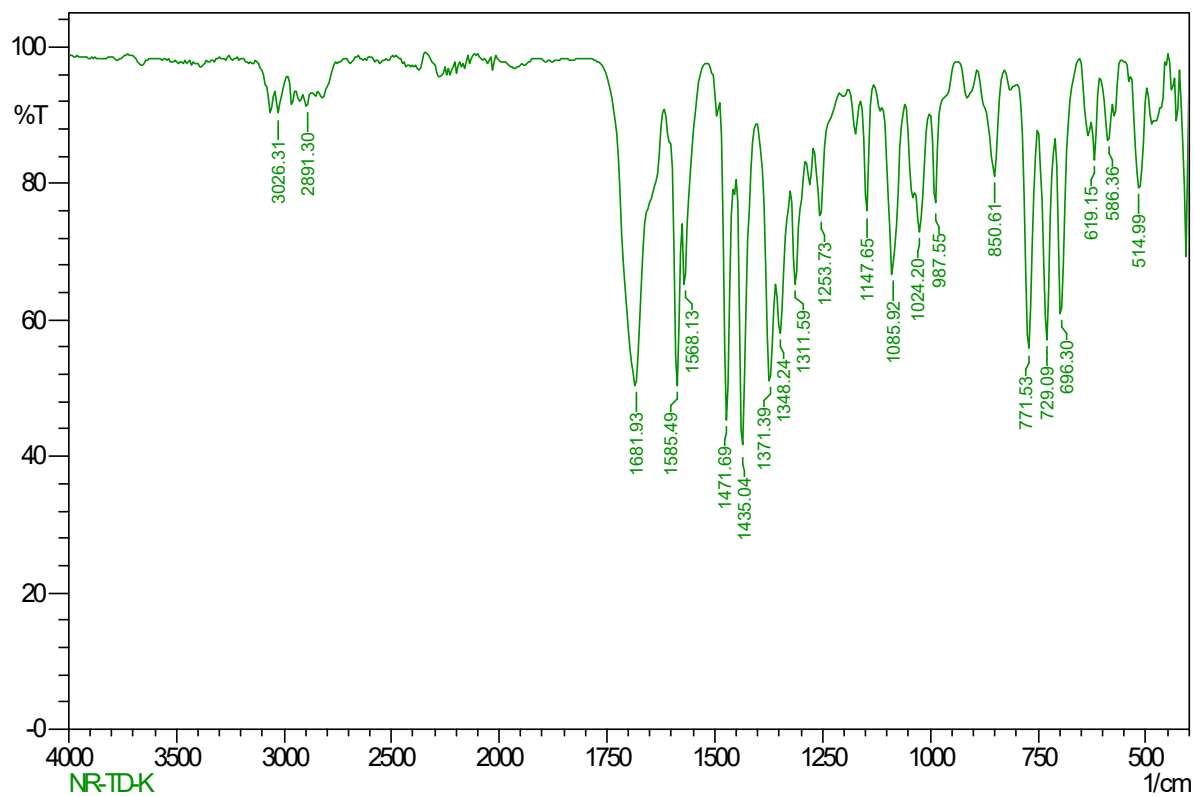

HRMS and IR spectra compound 4f.

Signature SIF VIT VELLORE  
NR-718-ID-T

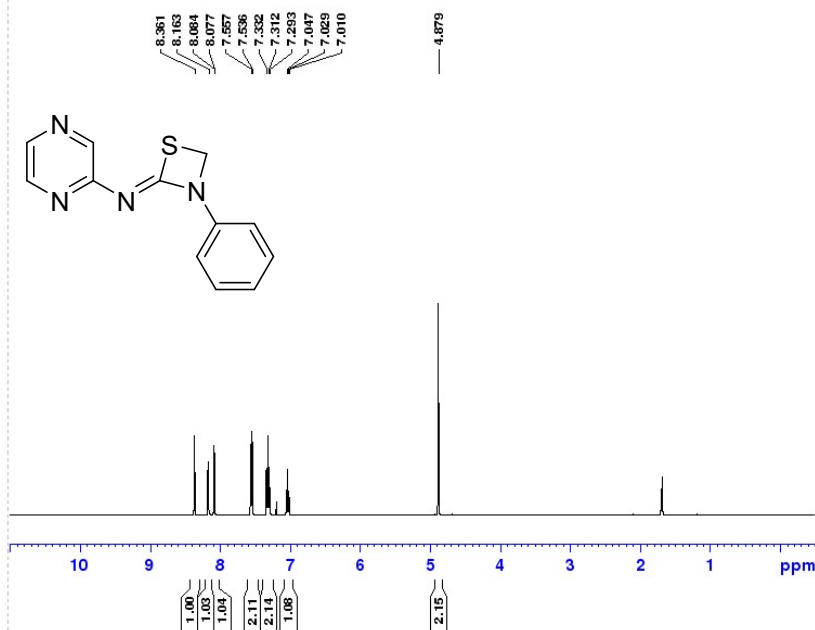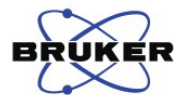

Current Data Parameters  
NAME 2-Amino pyrazine with  
EXPNO 34  
PROCNO 1

F2 - Acquisition Parameters  
Date\_ 20180718  
Time 18.19 h  
INSTRUM spect  
PROBHD Z108618\_0505 (  
PULPROG zg30  
TD 65536  
SOLVENT CDCl3  
NS 16  
DS 2  
SWH 8012.820 Hz  
FIDRES 0.244532 Hz  
AQ 4.0894465 sec  
RG 127.79  
DW 62.400 usec  
DE 6.50 usec  
TE 298.5 K  
D1 1.0000000 sec  
TD0 1  
SFO1 400.2604716 MHz  
NUC1 1H  
P1 14.27 usec  
PLW1 15.0000000 W

F2 - Processing parameters  
SI 65536  
SF 400.2580382 MHz  
WDW EM  
SSB 0  
LB 0.30 Hz  
GB 0  
PC 1.00

Signature SIF VIT VELLORE  
NR-718-ID-T

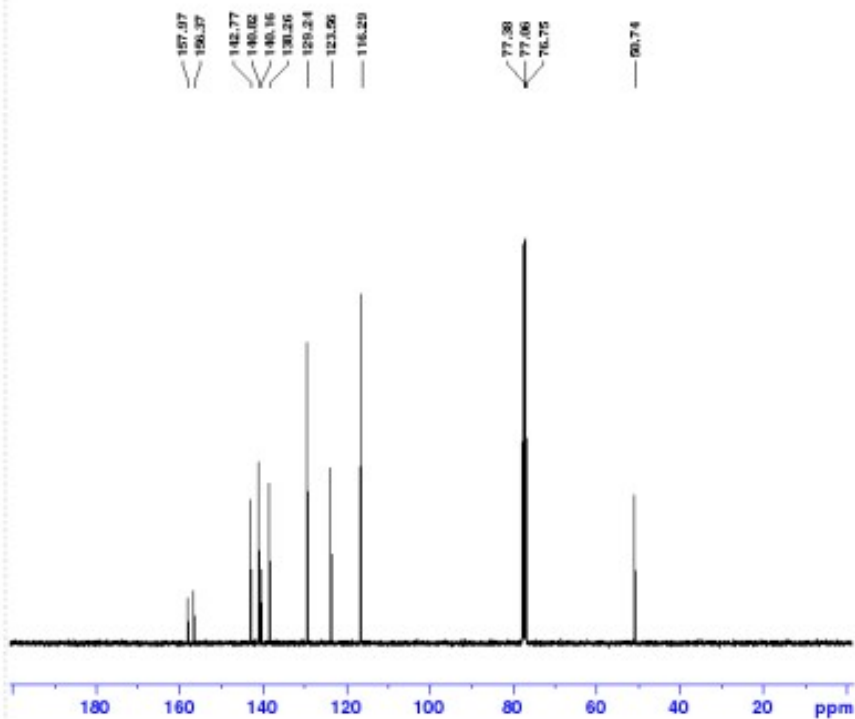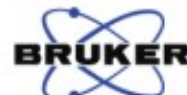

Current Data Parameters  
NAME 2-Amino pyrazine with  
EXPNO 35  
PROCNO 1

F2 - Acquisition Parameters  
Date\_ 20180718  
Time 18.49 h  
INSTRUM spect  
PROBHD Z108618\_0505 (  
PULPROG zgpg30  
TD 65536  
SOLVENT CDCl3  
NS 512  
DS 4  
SWH 24038.461 Hz  
FIDRES 0.733596 Hz  
AQ 1.3631480 sec  
RG 156.91  
DW 20.800 usec  
DE 6.50 usec  
TE 299.2 K  
D1 2.0000000 sec  
D11 0.03000000 sec  
TD0 1  
SFO1 100.6250186 MHz  
NUC1 13C  
P1 9.80 usec  
PLW1 50.0000000 W  
SFO2 400.2536010 MHz  
NUC2 1H  
CPDPRG2 waltz16  
PCPD2 90.00 usec  
PLW2 15.0000000 W  
PLW12 6.37755559 W  
PLW13 0.10262000 W

F2 - Processing parameters  
SI 32768  
SF 100.6449542 MHz  
WDW EM  
SSB 0  
LB 1.00 Hz  
GB 0  
PC 1.40

<sup>1</sup>H and <sup>13</sup>C NMR spectra of compound 4g

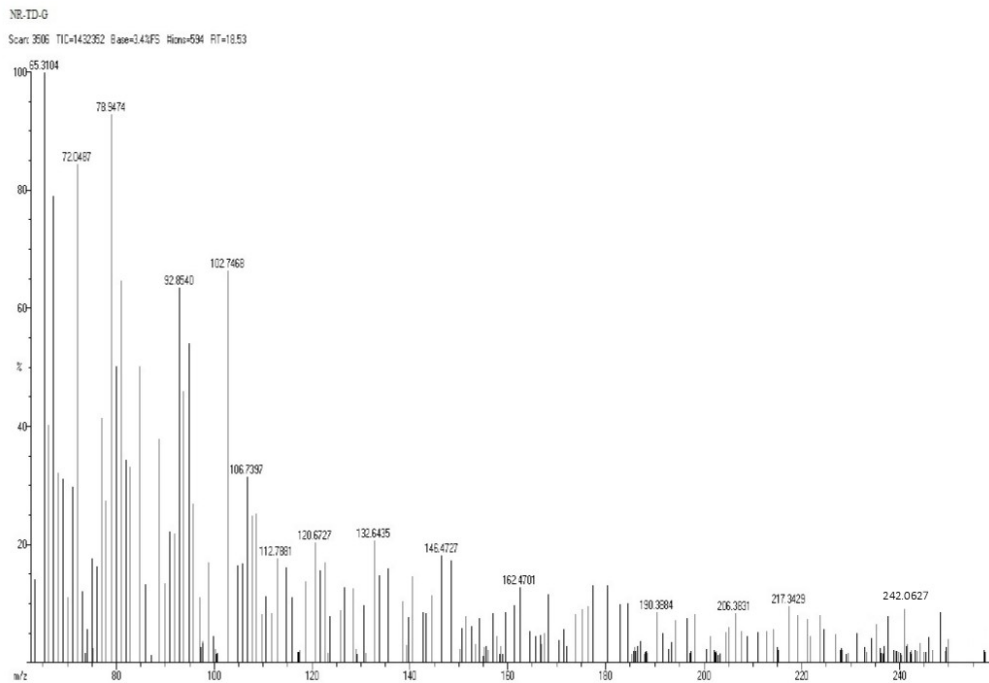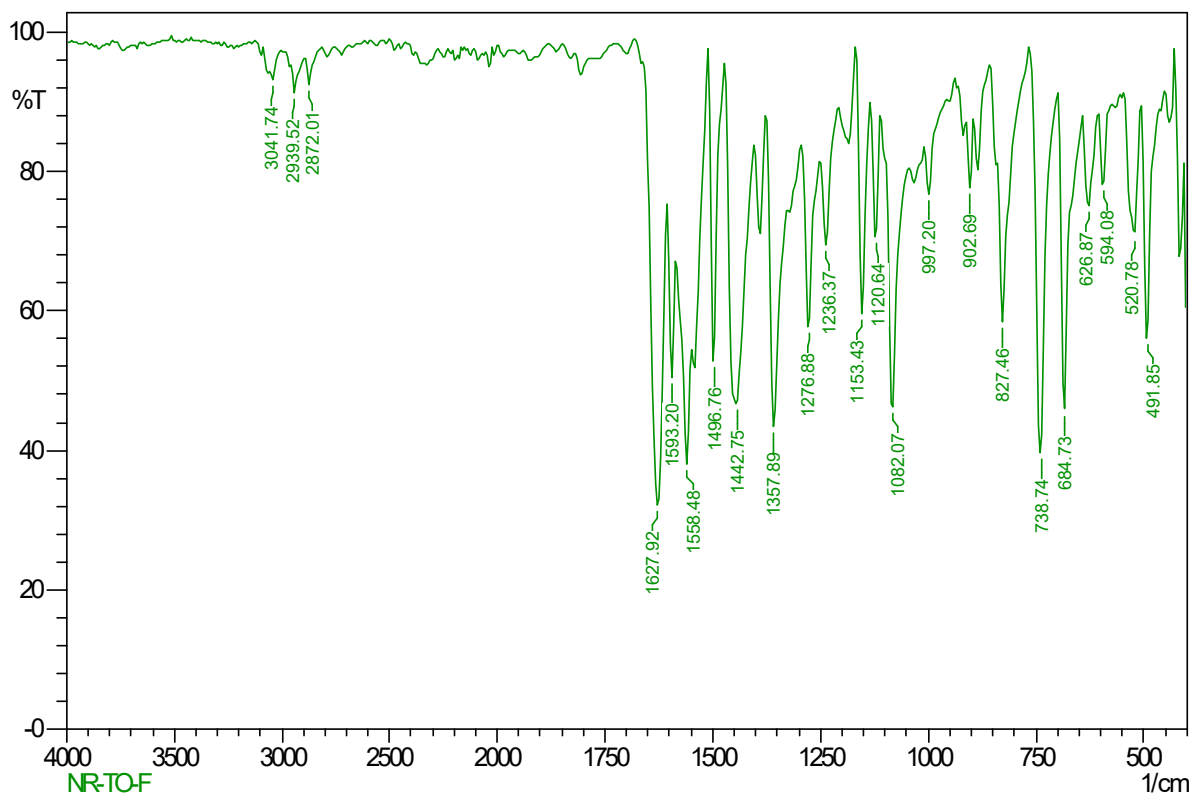

HRMS and IR spectra compound 4g.

Signature SIF VIT VELLORE  
NR-318-TD-H

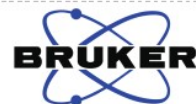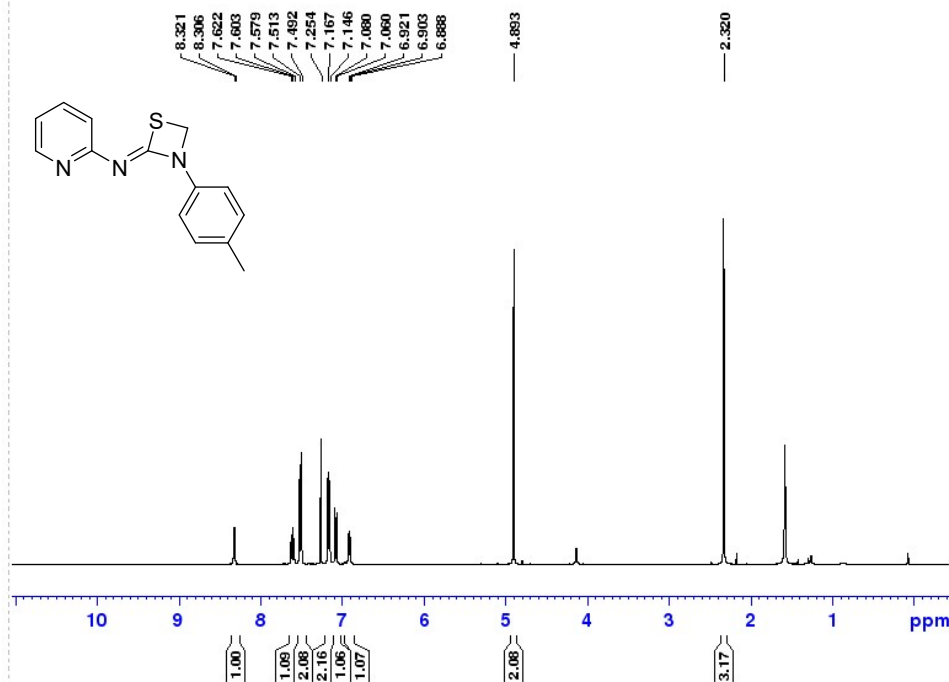

Current Data Parameters  
NAME 2-Amino Pyridine  
EXPNO 53  
PROCNO 1

F2 - Acquisition Parameters  
Date\_ 20180324  
Time 7.59 h  
INSTRUM spect  
PROBHD Z108618\_0505 (  
PULPROG zg30  
TD 65536  
SOLVENT CDCl3  
NS 16  
DS 2  
SWH 8012.820 Hz  
FIDRES 0.244532 Hz  
AQ 4.0894465 sec  
RG 175.97  
DW 62.400 usec  
DE 6.50 usec  
TE 301.2 K  
D1 1.0000000 sec  
TD0 1  
SFO1 400.2604716 MHz  
NUC1 1H  
P1 14.27 usec  
PLW1 15.0000000 W

F2 - Processing parameters  
SI 65536  
SF 400.2580124 MHz  
WDW EM  
SSB 0  
LB 0.30 Hz  
GB 0  
PC 1.00

Signature SIF VIT VELLORE  
NR-318-TD-H

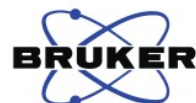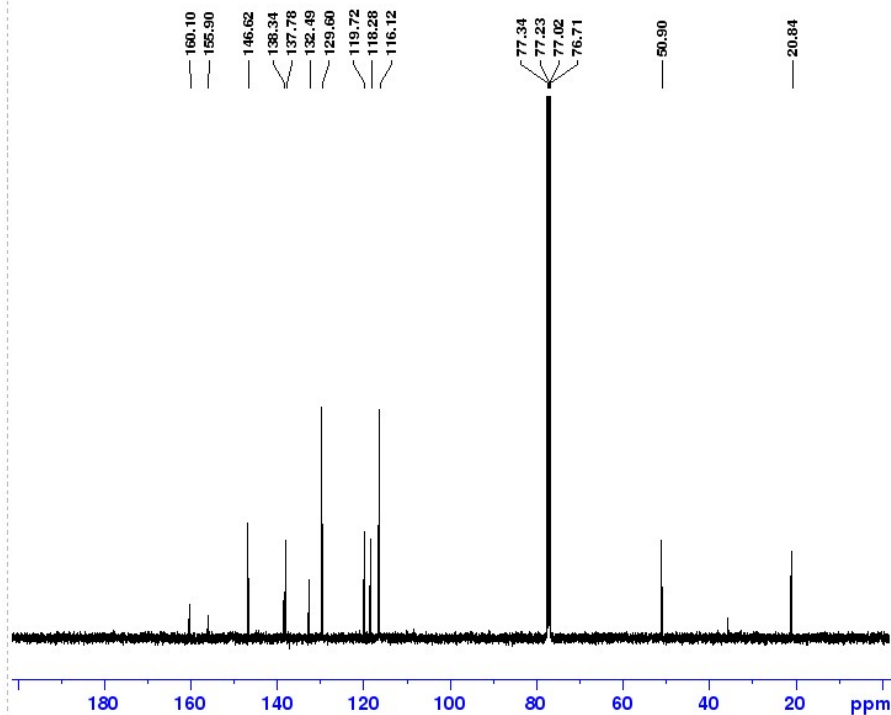

Current Data Parameters  
NAME 2-Amino Pyridine  
EXPNO 54  
PROCNO 1

F2 - Acquisition Parameters  
Date\_ 20180324  
Time 8.29 h  
INSTRUM spect  
PROBHD Z108618\_0505 (  
PULPROG zgpg30  
TD 65536  
SOLVENT CDCl3  
NS 512  
DS 4  
SWH 24038.461 Hz  
FIDRES 0.733596 Hz  
AQ 1.3631488 sec  
RG 156.91  
DW 20.800 usec  
DE 6.50 usec  
TE 302.3 K  
D1 2.0000000 sec  
D11 0.0300000 sec  
TD0 1  
SFO1 100.6550186 MHz  
NUC1 13C  
P1 9.80 usec  
PLW1 58.0000000 W  
SFO2 400.2596010 MHz  
NUC2 1H  
CPDPRG2 waltz16  
PCPD2 90.00 usec  
PLW2 15.0000000 W  
PLW12 0.37709999 W  
PLW13 0.18968000 W

F2 - Processing parameters  
SI 32768  
SF 100.6449542 MHz  
WDW EM  
SSB 0  
LB 1.00 Hz  
GB 0  
PC 1.40

$^1\text{H}$  and  $^{13}\text{C}$  NMR spectra of compound 4h.



NR-TO-G  
Scan: 3416 TIC: 2917552 Date: 22/11/16 #Inj: 556 RT: 10.00

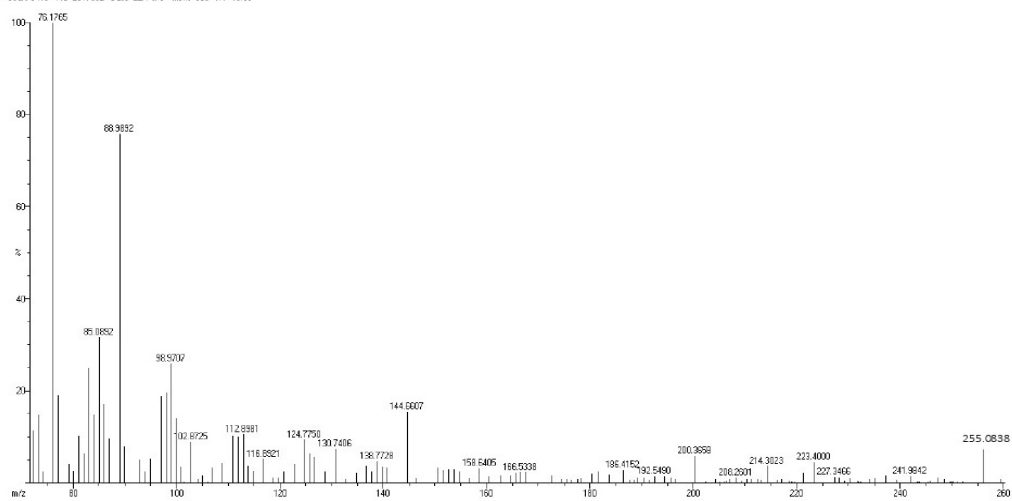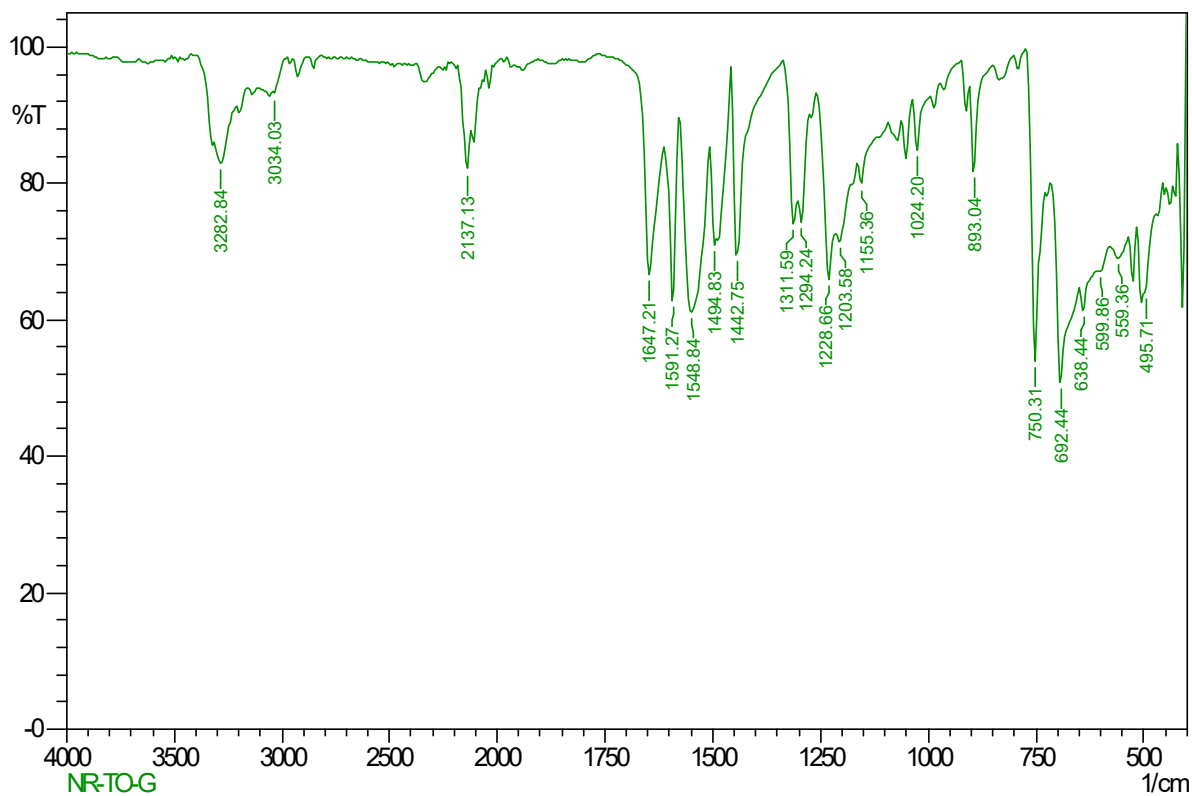

HRMS and IR spectra compound 4h

Signature SIF VIT VELLORE  
NR-318-TD-J

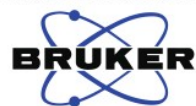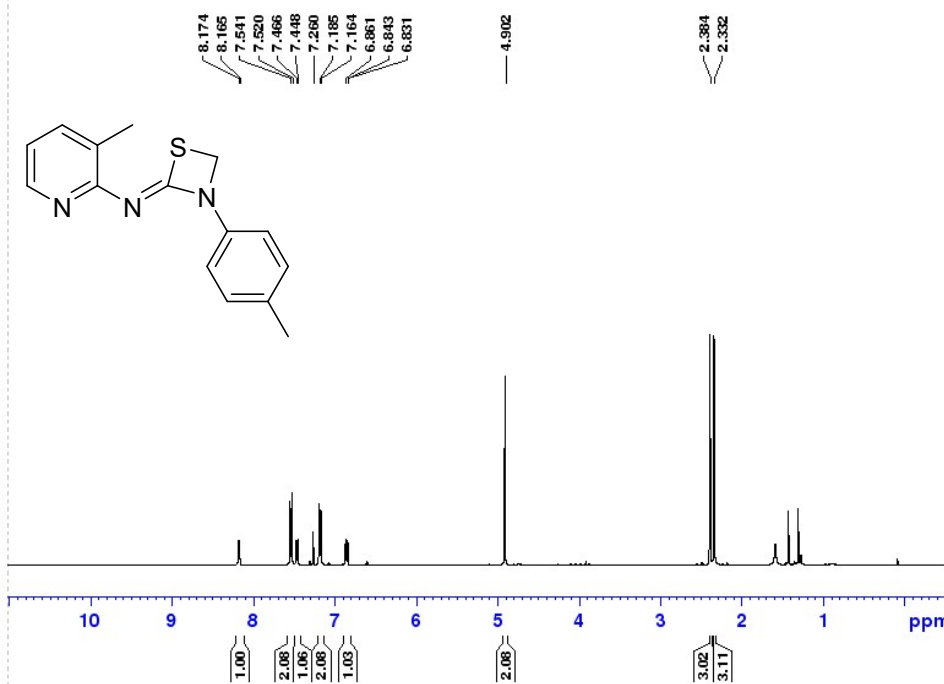

Current Data Parameters  
NAME 3-Methyl Amino Pyridin  
EXPNO 3  
PROCNO 1

F2 - Acquisition Parameters  
Date\_ 20180410  
Time 19.46 h  
INSTRUM spect  
PROBHD Z108618\_0505 (  
PULPROG zg30  
TD 65536  
SOLVENT CDCl3  
NS 16  
DS 2  
SWH 8012.820 Hz  
FIDRES 0.244532 Hz  
AQ 4.0894465 sec  
RG 143.73  
DW 62.400 usec  
DE 6.50 usec  
TE 302.7 K  
D1 1.0000000 sec  
TD0 1  
SFO1 400.2604716 MHz  
NUC1 1H  
P1 14.27 usec  
PLW1 15.0000000 W

F2 - Processing parameters  
SI 65536  
SF 400.2580099 MHz  
WDW EM  
SSB 0  
LB 0.30 Hz  
GB 0  
PC 1.00

Signature SIF VIT VELLORE  
NR-318-TD-J

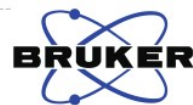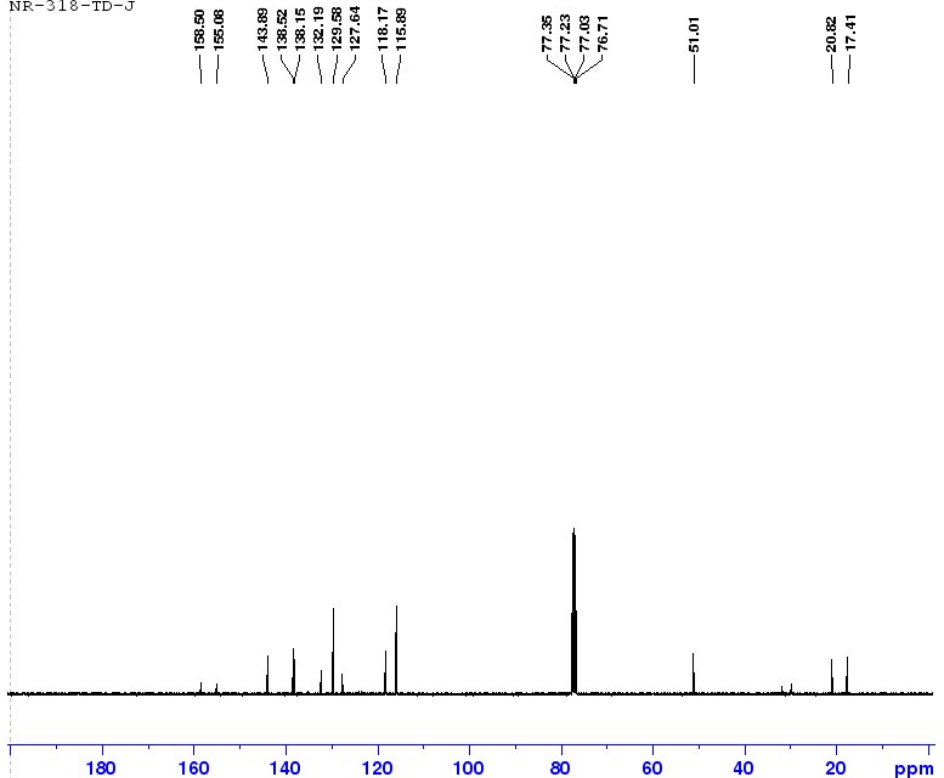

Current Data Parameters  
NAME 3-Methyl Amino Pyridin  
EXPNO 4  
PROCNO 1

F2 - Acquisition Parameters  
Date\_ 20180410  
Time 20.17 h  
INSTRUM spect  
PROBHD Z108618\_0505 (  
PULPROG zgpg30  
TD 65536  
SOLVENT CDCl3  
NS 512  
DS 4  
SWH 24038.461 Hz  
FIDRES 0.733596 Hz  
AQ 1.3631488 sec  
RG 199.6  
DW 20.800 usec  
DE 6.50 usec  
TE 303.4 K  
D1 2.0000000 sec  
D11 0.0300000 sec  
TD0 1  
SFO1 100.6250186 MHz  
NUC1 13C  
P1 9.80 usec  
PLW1 58.0000000 W  
SFO2 400.2596010 MHz  
NUC2 1H  
CPDPRG[2] waltz16  
PCPD2 90.00 usec  
PLW2 15.0000000 W  
PLW12 0.37709999 W  
PLW13 0.18968000 W

F2 - Processing parameters  
SI 32768  
SF 100.6449542 MHz  
WDW EM  
SSB 0  
LB 1.00 Hz  
GB 0  
PC 1.40

$^1\text{H}$  and  $^{13}\text{C}$  NMR spectra of compound 4i.

NR-TD-H

Scan: 3509 TIC=1434688 Base=3%FS #Ions=625 RT=18.54

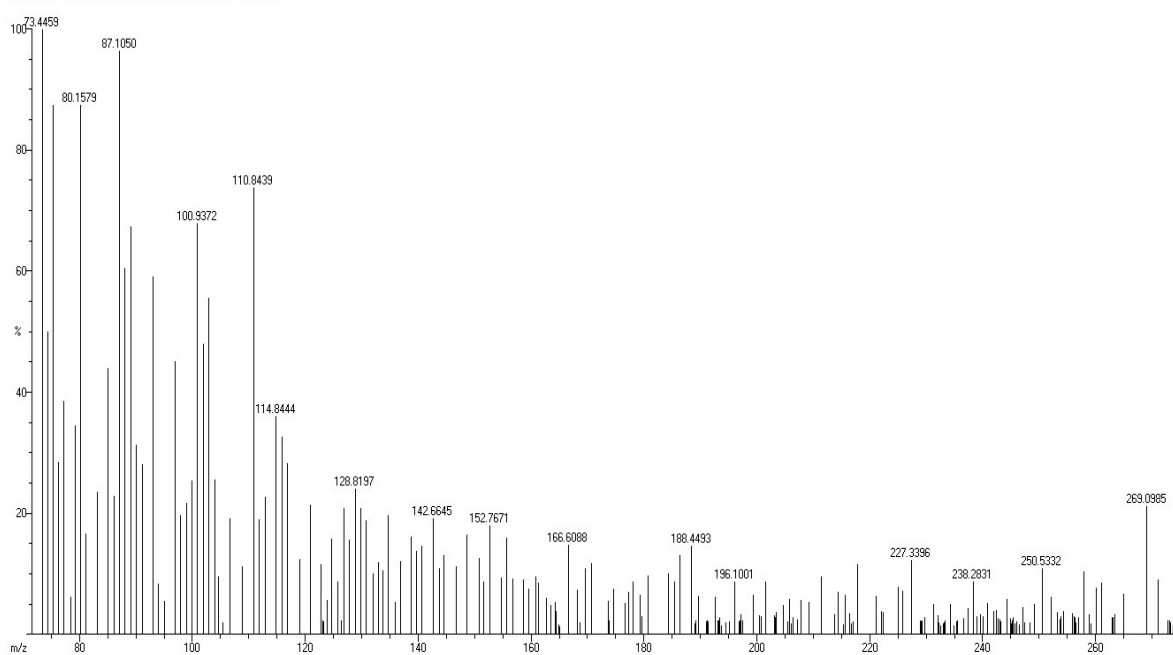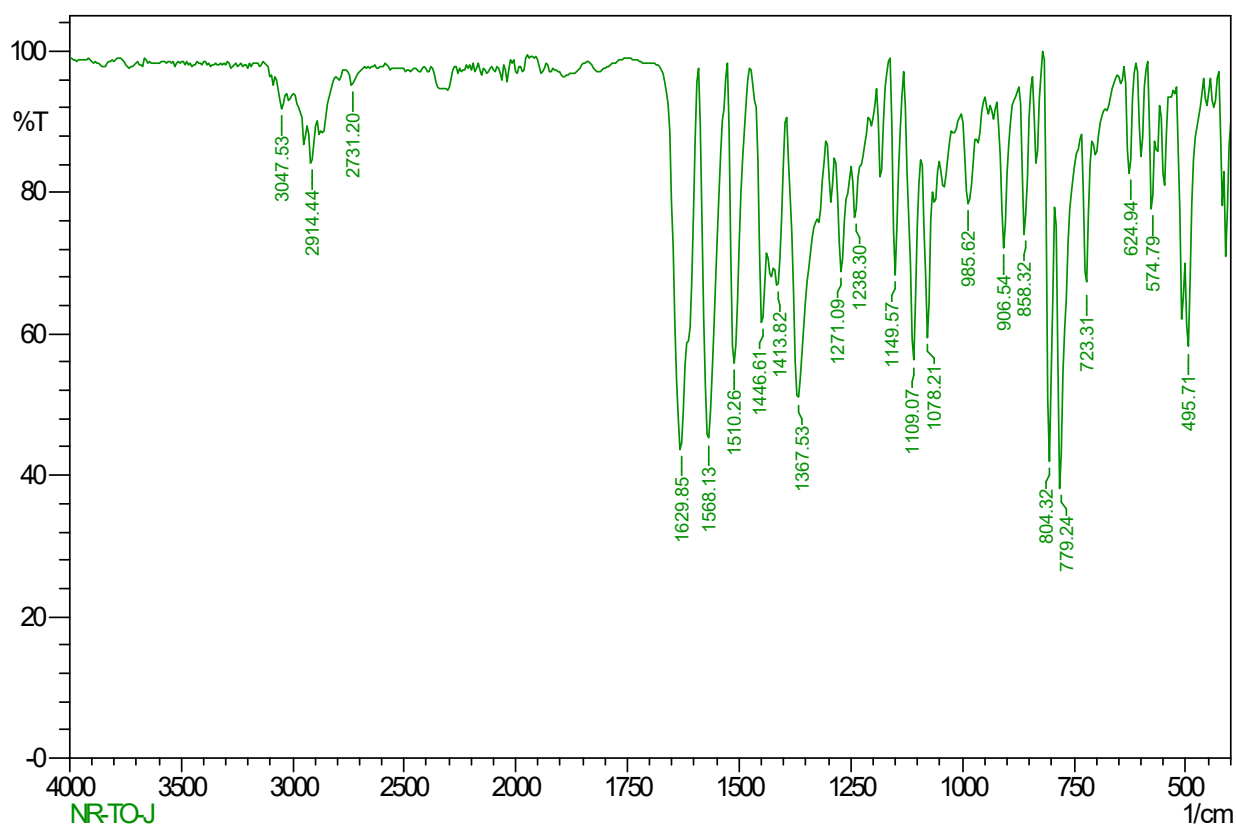

HRMS and IR spectra compound 4i

Signature SIF VIT VELLORE  
NR-318-TD-H

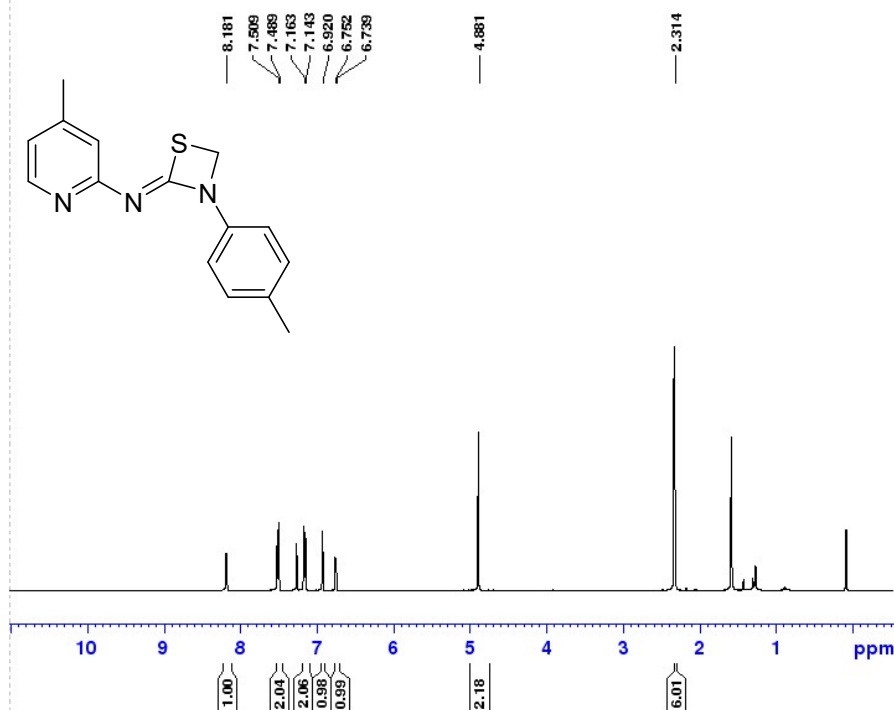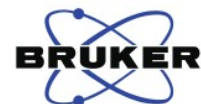

Current Data Parameters  
NAME 4-Methyl Amino Pyridir  
EXPNO 61  
PROCNO 1

F2 - Acquisition Parameters  
Date\_ 20180329  
Time 23.24 h  
INSTRUM spect  
PROBHD Z108618\_0505 (  
PULPROG zg30  
TD 65536  
SOLVENT CDCl3  
NS 16  
DS 2  
SWH 8012.820 Hz  
FIDRES 0.244532 Hz  
AQ 4.0894465 sec  
RG 175.97  
DW 62.400 usec  
DE 6.50 usec  
TE 304.4 K  
D1 1.00000000 sec  
TD0 1  
SFO1 400.2604716 MHz  
NUC1 1H  
P1 14.27 usec  
PLW1 15.00000000 W

F2 - Processing parameters  
SI 65536  
SF 400.2580106 MHz  
WDW EM  
SSB 0  
LB 0.30 Hz  
GB 0  
PC 1.00

Signature SIF VIT VELLORE  
NR-318-TD-H

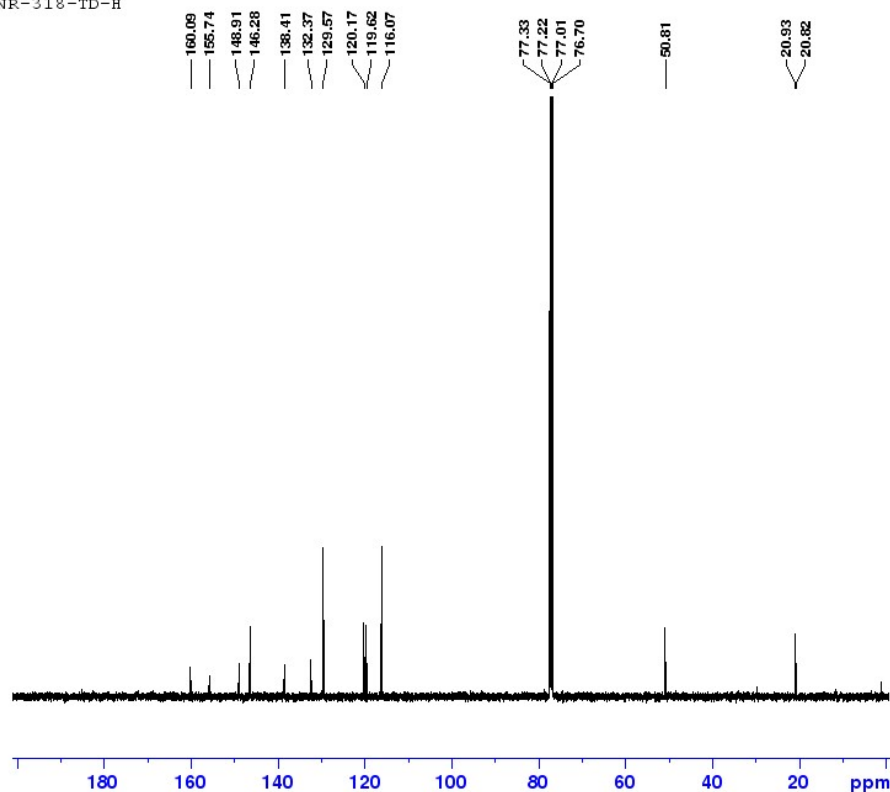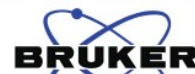

NAME 4-Methyl Amino Pyridir  
EXPNO 62  
PROCNO 1

F2 - Acquisition Parameters  
Date\_ 20180329  
Time 23.54 h  
INSTRUM spect  
PROBHD Z108618\_0505 (  
PULPROG zgpg30  
TD 65536  
SOLVENT CDCl3  
NS 512  
DS 4  
SWH 24038.461 Hz  
FIDRES 0.733596 Hz  
AQ 1.3631488 sec  
RG 199.6  
DW 20.800 usec  
DE 6.50 usec  
TE 304.7 K  
D1 2.00000000 sec  
D11 0.03000000 sec  
TD0 1  
SFO1 100.6550186 MHz  
NUC1 13C  
P1 9.80 usec  
PLW1 58.00000000 W  
SFO2 400.2596010 MHz  
NUC2 1H  
CPDPRG[2] waltz16  
PCPD2 90.00 usec  
PLW2 15.00000000 W  
PLW12 0.37709999 W  
PLW13 0.18968000 W

F2 - Processing parameters  
SI 32768  
SF 100.6449542 MHz  
WDW EM  
SSB 0  
LB 1.00 Hz  
GB 0  
PC 1.40

<sup>1</sup>H and <sup>13</sup>C NMR spectra of compound 4j

NR-TD-1

Scan: 3515 TIC=1409664 Base=3.12%FS #Ions=650 RT=18.57

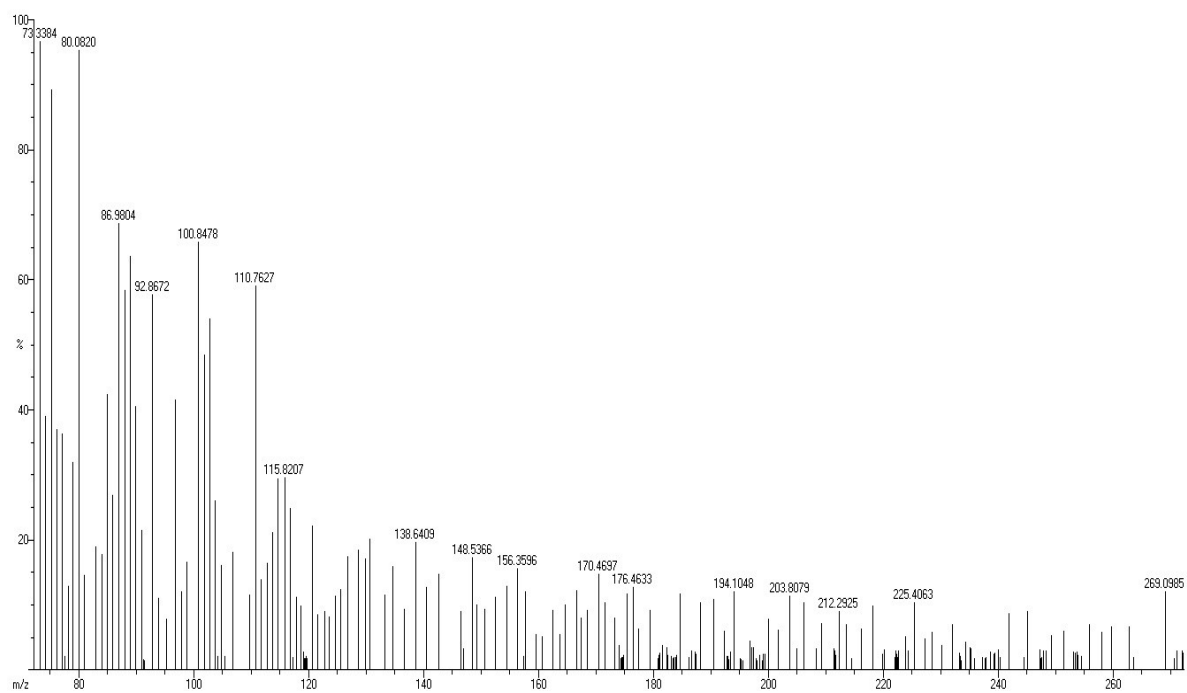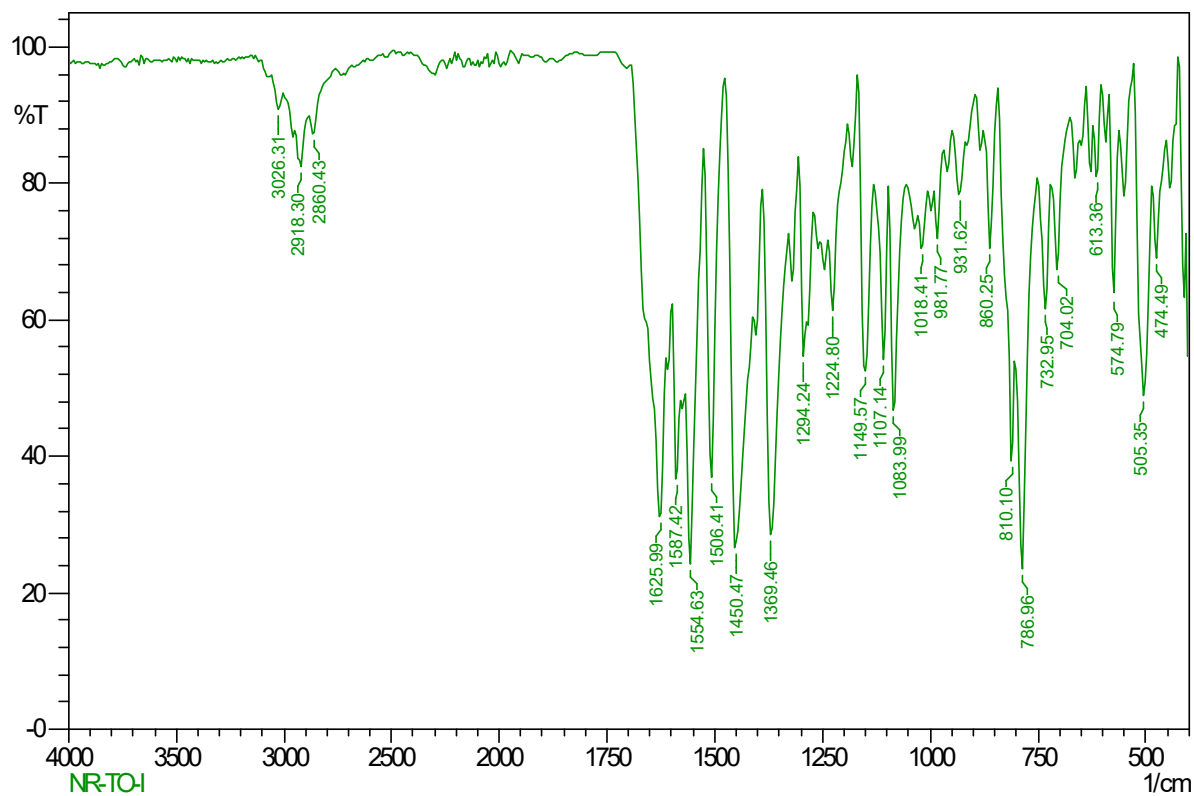

HRMS and IR spectra compound 4j

Signature SIF VIT VELLORE  
NR-318-TD-I

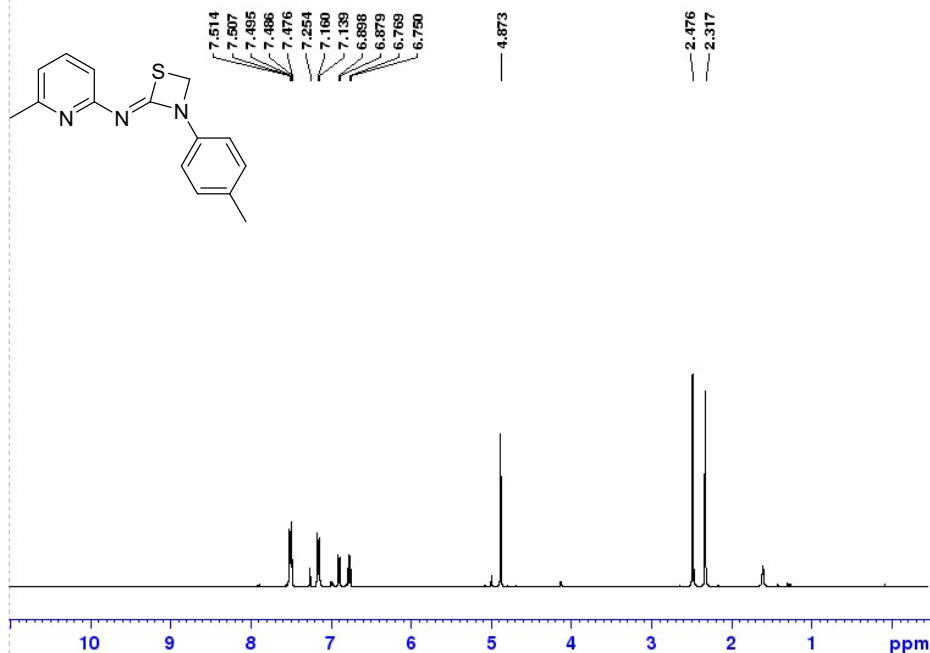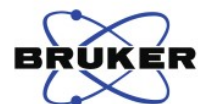

Current Data Parameters  
NAME 6-Methyl Amino Pyridir  
EXPNO 1  
PROCNO 1

F2 - Acquisition Parameters  
Date\_ 20180404  
Time 20.06 h  
INSTRUM spect  
PROBHD Z108618\_0505 (  
PULPROG zg30  
TD 65536  
SOLVENT CDCl3  
NS 16  
DS 2  
SWH 8012.820 Hz  
FIDRES 0.244532 Hz  
AQ 4.0894465 sec  
RG 112.69  
DW 62.400 usec  
DE 6.50 usec  
TE 302.2 K  
D1 1.0000000 sec  
TD0 1  
SFO1 400.2604716 MHz  
NUC1 1H  
P1 14.27 usec  
PLW1 15.0000000 W

F2 - Processing parameters  
SI 65536  
SF 400.2580122 MHz  
WDW EM  
SSB 0  
LB 0.30 Hz  
GB 0  
PC 1.00

Signature SIF VIT VELLORE  
NR-318-TD-I

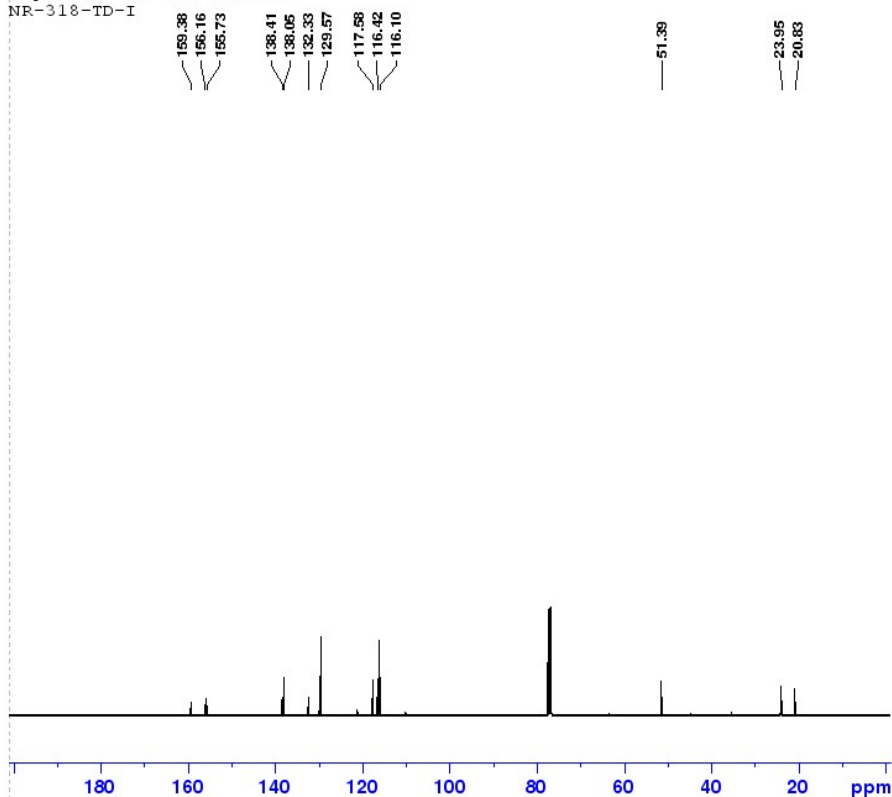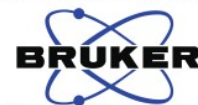

Current Data Parameters  
NAME 6-Methyl Amino Pyridir  
EXPNO 2  
PROCNO 1

F2 - Acquisition Parameters  
Date\_ 20180404  
Time 20.36 h  
INSTRUM spect  
PROBHD Z108618\_0505 (  
PULPROG zgpg30  
TD 65536  
SOLVENT CDCl3  
NS 512  
DS 4  
SWH 24038.461 Hz  
FIDRES 0.733596 Hz  
AQ 1.3631488 sec  
RG 199.6  
DW 20.800 usec  
DE 6.50 usec  
TE 303.0 K  
D1 2.0000000 sec  
D11 0.0300000 sec  
TD0 1  
SFO1 100.6550186 MHz  
NUC1 13C  
P1 9.80 usec  
PLW1 58.0000000 W  
SFO2 400.2596010 MHz  
NUC2 1H  
CPDPRG[2] waltz16  
PCPD2 90.00 usec  
PLW2 15.0000000 W  
PLW12 0.37709999 W  
PLW13 0.18968000 W

F2 - Processing parameters  
SI 32768  
SF 100.6449542 MHz  
WDW EM  
SSB 0  
LB 1.00 Hz  
GB 0  
PC 1.40

<sup>1</sup>H and <sup>13</sup>C NMR spectra of compound 4k.

NR-TD-1  
Scan: 3512 TIC=1427744 Base=3.2%FS #Ions=593 RT=18.56

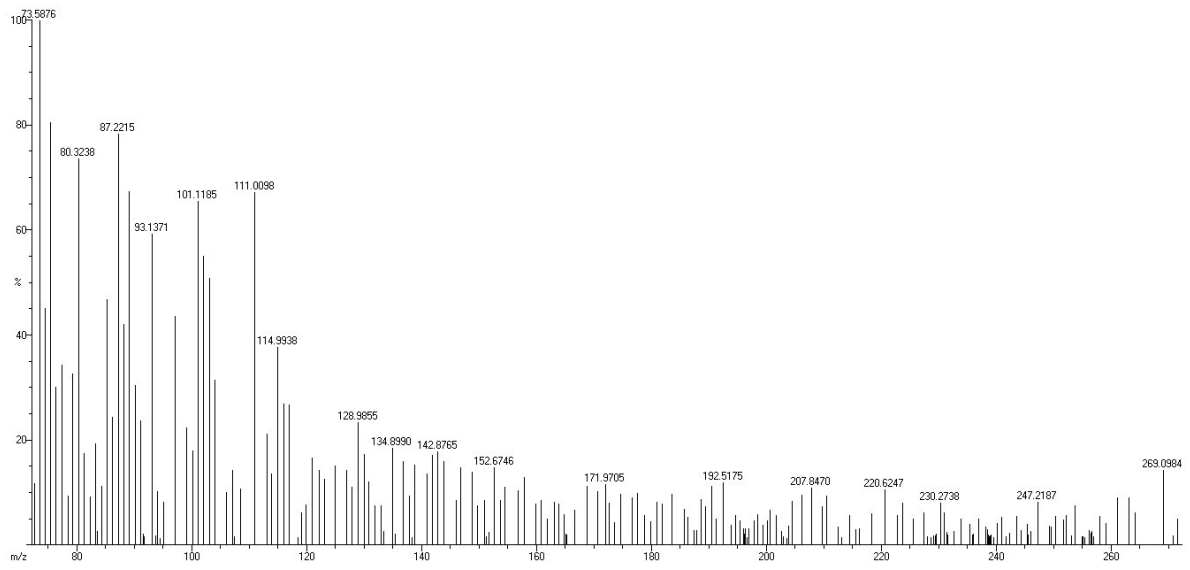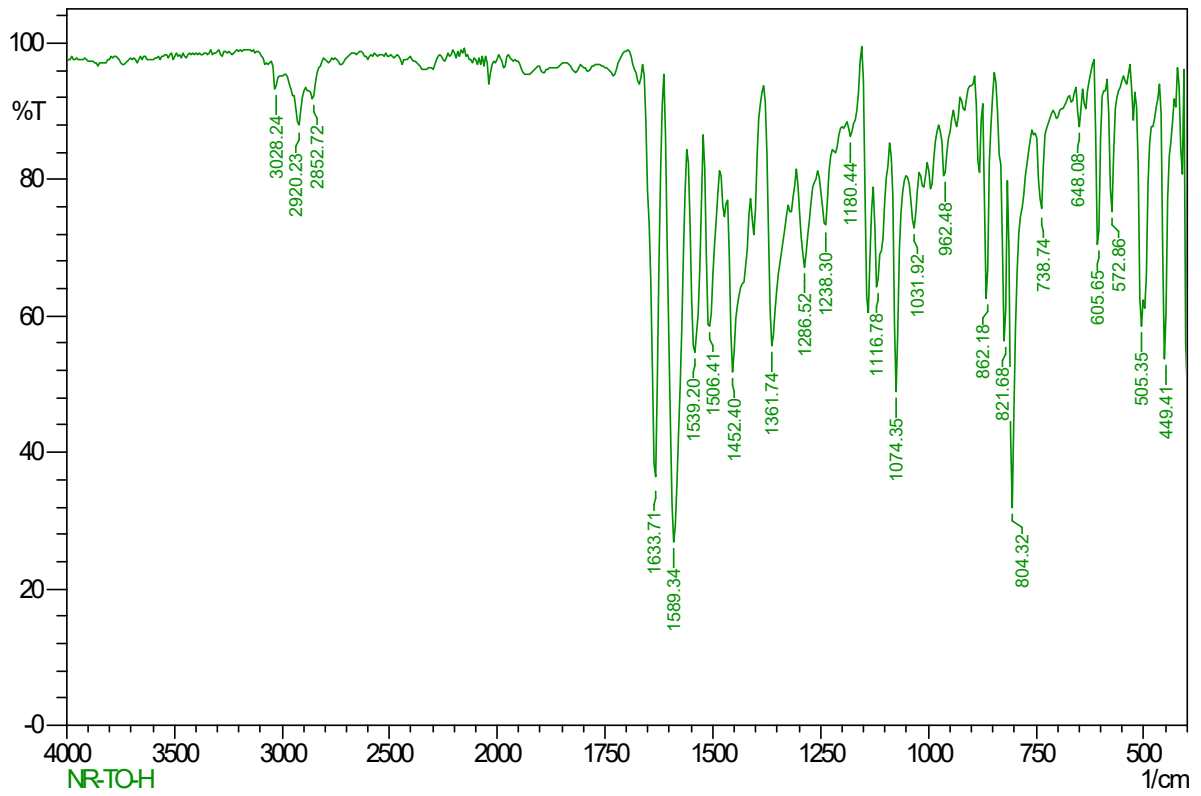

NR-TO-H

HRMS and IR spectra compound 4k

Signature SIF VIT VELLORE  
NR-318-TD-K

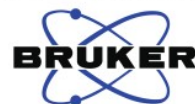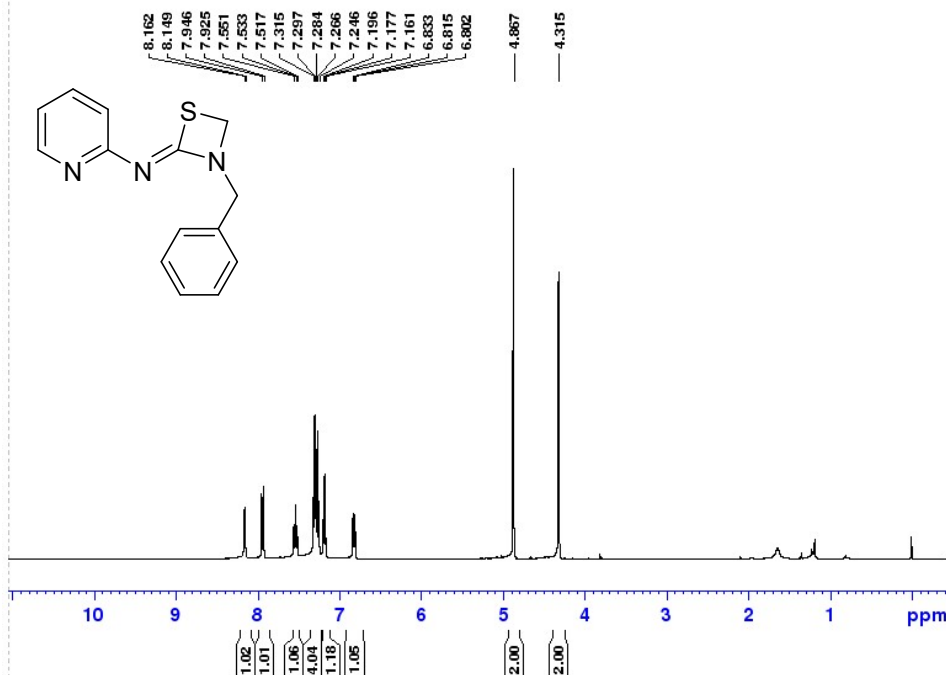

Current Data Parameters  
NAME Aminopyridine  
EXPNO 5  
PROCNO 1

F2 - Acquisition Parameters  
Date\_ 20180412  
Time 3.26 h  
INSTRUM spect  
PROBHD Z108618\_0505 (  
PULPROG zg30  
TD 65536  
SOLVENT CDCl3  
NS 16  
DS 2  
SWH 8012.820 Hz  
FIDRES 0.244532 Hz  
AQ 4.0894465 sec  
RG 112.69  
DW 62.400 usec  
DE 6.50 usec  
TE 300.0 K  
D1 1.00000000 sec  
TD0 1  
SFO1 400.2604716 MHz  
NUC1 1H  
P1 14.27 usec  
PLW1 15.00000000 W

F2 - Processing parameters  
SI 65536  
SF 400.2580426 MHz  
WDW EM  
SSB 0  
LB 0.30 Hz  
GB 0  
PC 1.00

Signature SIF VIT VELLORE  
NR-318-TD-K

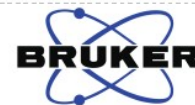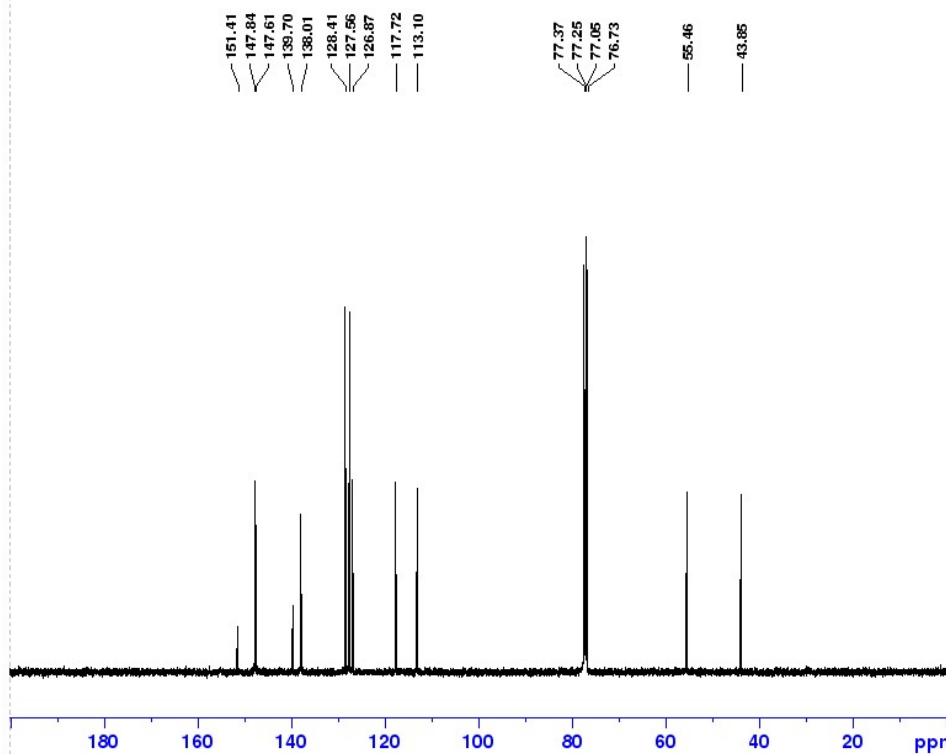

Current Data Parameters  
NAME Aminopyridine  
EXPNO 6  
PROCNO 1

F2 - Acquisition Parameters  
Date\_ 20180412  
Time 3.56 h  
INSTRUM spect  
PROBHD Z108618\_0505 (  
PULPROG zgpg30  
TD 65536  
SOLVENT CDCl3  
NS 512  
DS 4  
SWH 24038.461 Hz  
FIDRES 0.733596 Hz  
AQ 1.3631488 sec  
RG 112.69  
DW 20.800 usec  
DE 6.50 usec  
TE 300.2 K  
D1 2.00000000 sec  
D11 0.03000000 sec  
TD0 1  
SFO1 100.6550186 MHz  
NUC1 13C  
P1 9.80 usec  
PLW1 58.00000000 W  
SFO2 400.2596010 MHz  
NUC2 1H  
CPDPRG2 waltz16  
PCPD2 90.00 usec  
PLW2 15.00000000 W  
PLW12 0.37709999 W  
PLW13 0.18968000 W

F2 - Processing parameters  
SI 32768  
SF 100.6449542 MHz  
WDW EM  
SSB 0  
LB 1.00 Hz  
GB 0  
PC 1.40

<sup>1</sup>H and <sup>13</sup>C NMR spectra of compound 4l.



NR-TD-G

Scan: 3906 TIC=1432352 Base=3.4%FS #Ions=594 RT=18.53

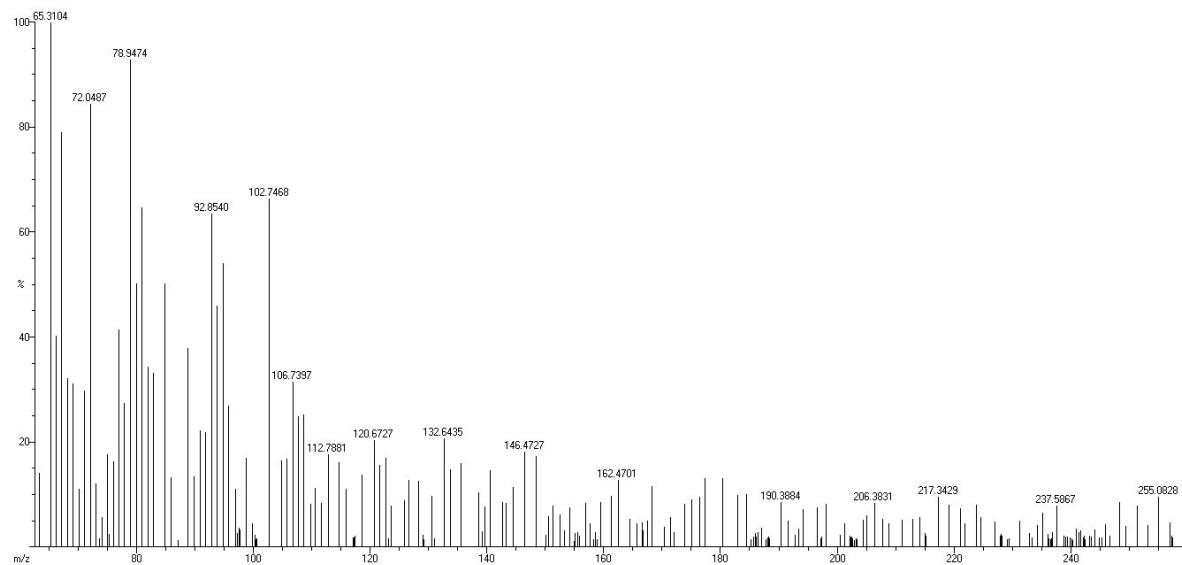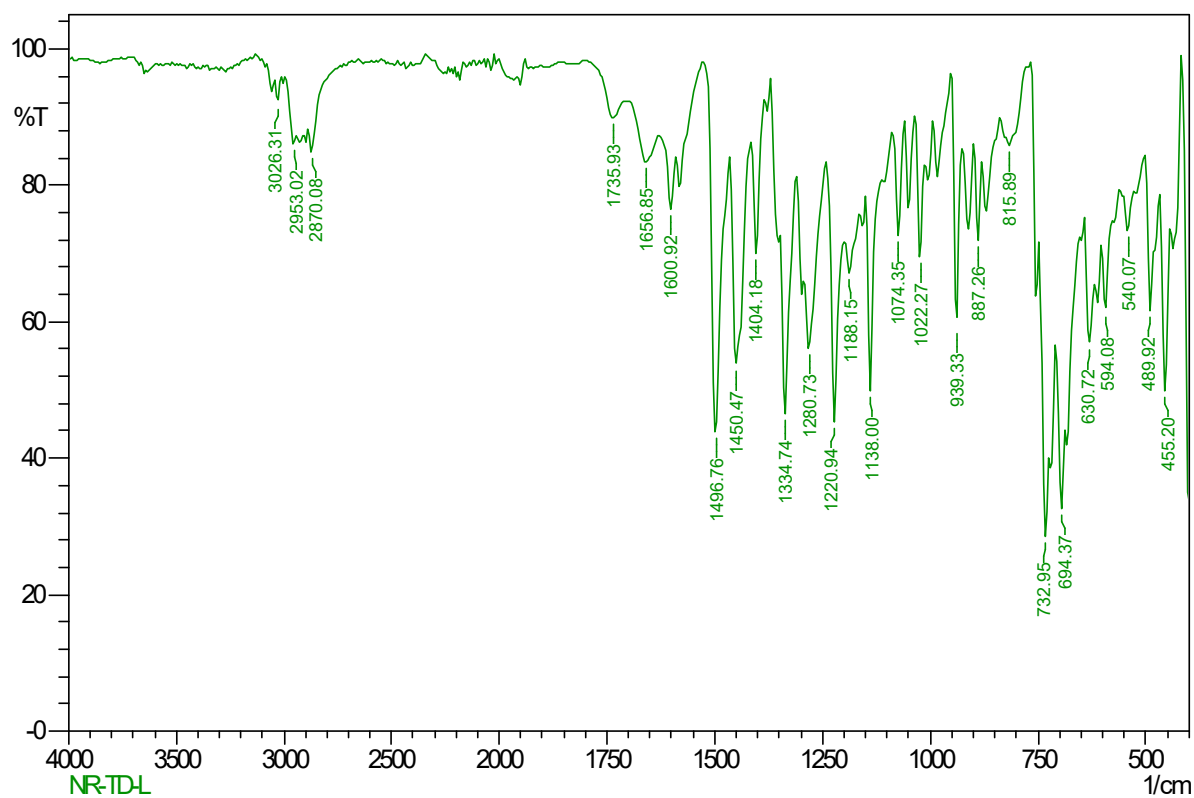

HRMS and IR spectra compound 41

Signature SIF VIT VELLORE  
NR-TD-418-M

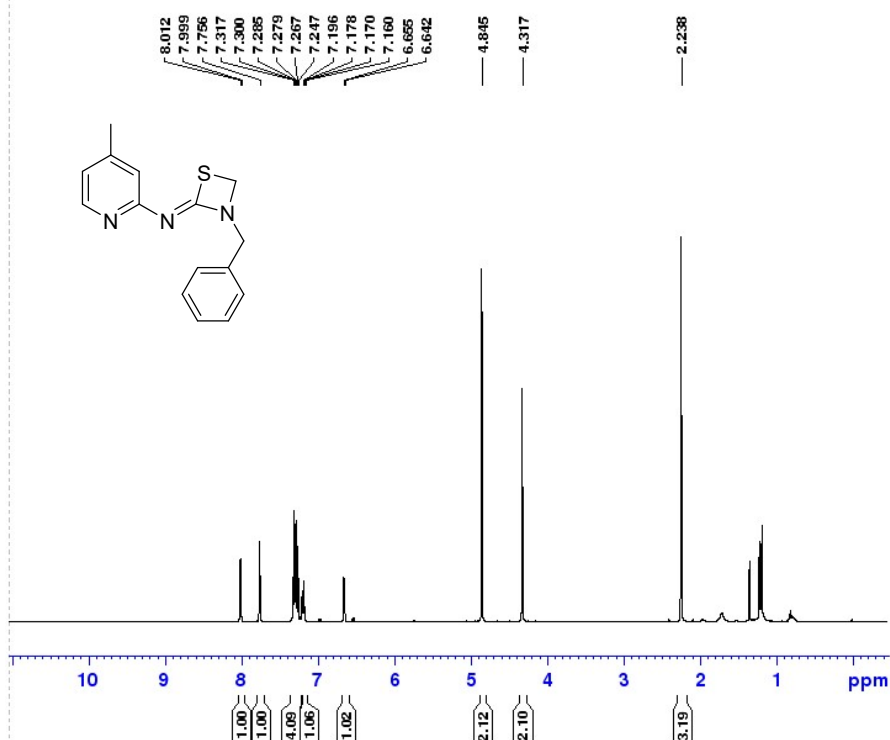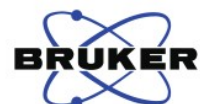

Current Data Parameters  
NAME 4-Methyl Amino Pyridi  
EXPNO 11  
PROCNO 1

F2 - Acquisition Parameters  
Date\_ 20180426  
Time 2.25 h  
INSTRUM spect  
PROBHD Z108618\_0505 (  
PULPROG zg30  
TD 65536  
SOLVENT CDCl3  
NS 16  
DS 2  
SWH 8012.820 Hz  
FIDRES 0.244532 Hz  
AQ 4.0894465 sec  
RG 71.13  
DW 62.400 usec  
DE 6.50 usec  
TE 299.3 K  
D1 1.0000000 sec  
TD0 1  
SFO1 400.2604716 MHz  
NUC1 1H  
P1 14.27 usec  
PLW1 15.0000000 W

F2 - Processing parameters  
SI 65536  
SF 400.2580457 MHz  
WDW EM  
SSB 0  
LB 0.30 Hz  
GB 0  
PC 1.00

Signature SIF VIT VELLORE  
NR-TD-418-M

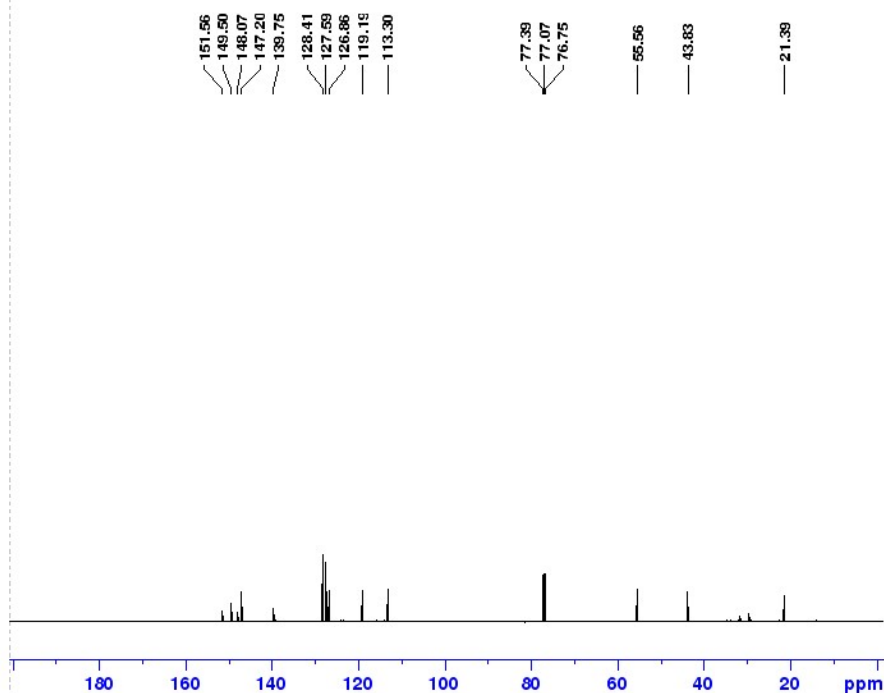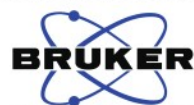

Current Data Parameters  
NAME 4-Methyl Amino Pyrid  
EXPNO 12  
PROCNO 1

F2 - Acquisition Parameters  
Date\_ 20180426  
Time 2.56 h  
INSTRUM spect  
PROBHD Z108618\_0505 (  
PULPROG zgpg30  
TD 65536  
SOLVENT CDCl3  
NS 512  
DS 4  
SWH 24038.461 Hz  
FIDRES 0.733596 Hz  
AQ 1.3631488 sec  
RG 112.69  
DW 20.800 usec  
DE 6.50 usec  
TE 299.4 K  
D1 2.0000000 sec  
D11 0.0300000 sec  
TD0 1  
SFO1 100.6550186 MHz  
NUC1 13C  
P1 9.80 usec  
PLW1 58.0000000 W  
SFO2 400.2596010 MHz  
NUC2 1H  
CPDPRG2 waltz16  
PCPD2 90.00 usec  
PLW2 15.0000000 W  
PLW12 0.37709999 W  
PLW13 0.18968000 W

F2 - Processing parameters  
SI 32768  
SF 100.6449542 MHz  
WDW EM  
SSB 0  
LB 1.00 Hz  
GB 0  
PC 1.40

<sup>1</sup>H and <sup>13</sup>C NMR spectra of compound 4m

NR-TD-N  
Scan: 3519 TIC=1374304 Base=3%FS #Ions=645 RT=18.59

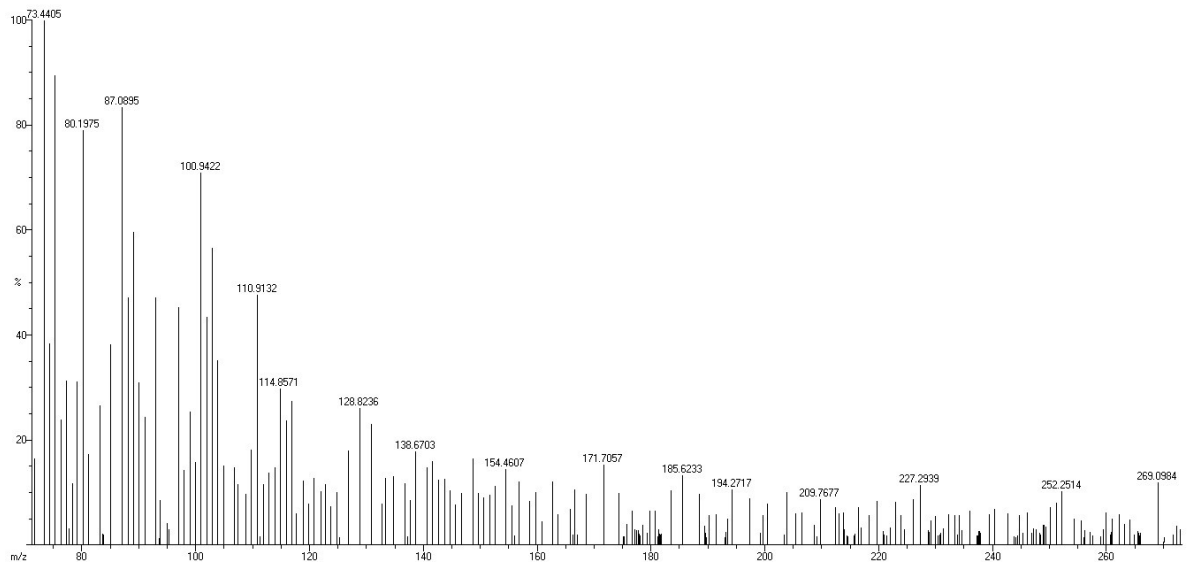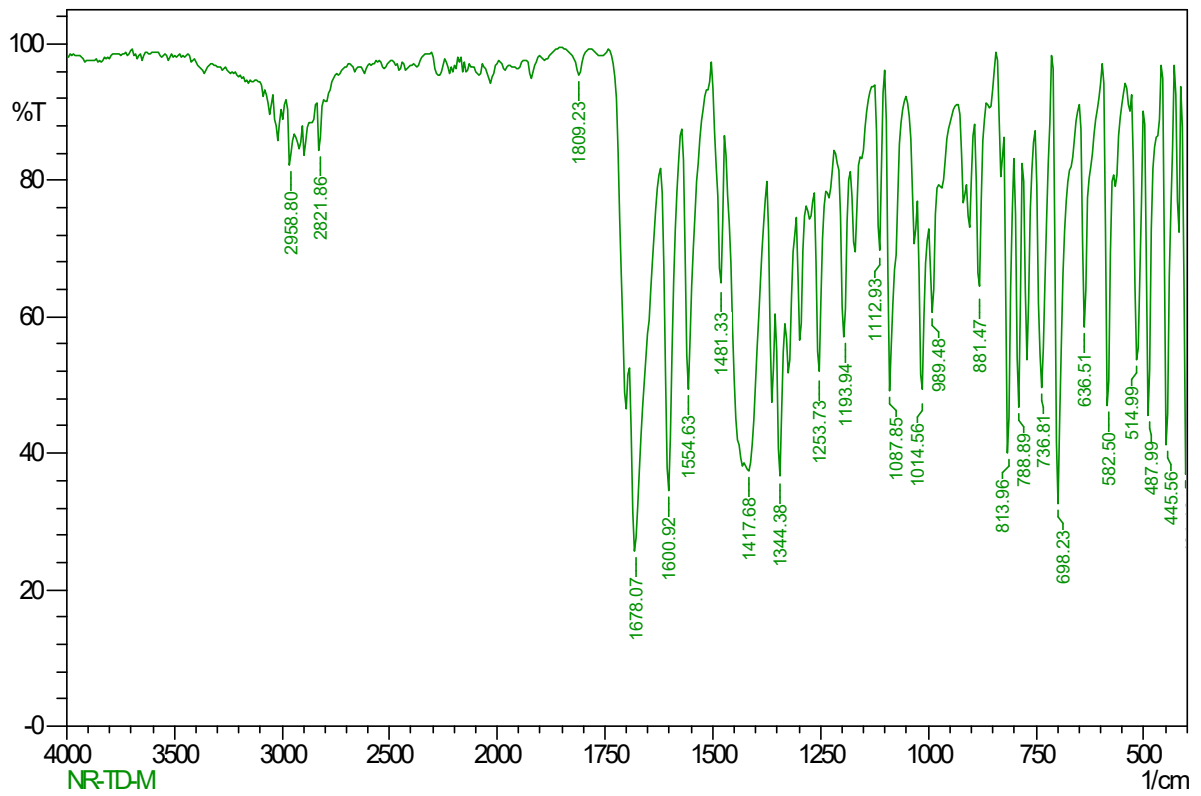

HRMS and IR spectra compound 4m

Signature SIF VIT VELLORE  
NR-418-TD-N

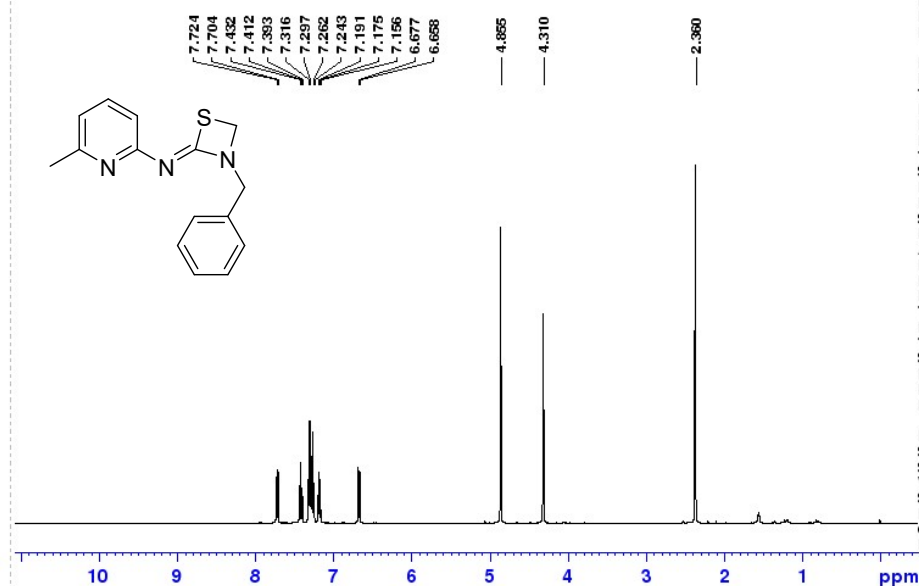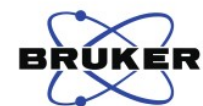

Current Data Parameters  
NAME 6-Methyl Amino Pyridir  
EXPNO 13  
PROCNO 1

F2 - Acquisition Parameters  
Date\_ 20180426  
Time 7.44 h  
INSTRUM spect  
PROBHD Z108618\_0505 (  
PULPROG zg30  
TD 65536  
SOLVENT CDCl3  
NS 16  
DS 2  
SWH 8012.820 Hz  
FIDRES 0.244532 Hz  
AQ 4.0894465 sec  
RG 112.69  
DW 62.400 usec  
DE 6.50 usec  
TE 298.2 K  
D1 1.0000000 sec  
TD0 1  
SFO1 400.2604716 MHz  
NUC1 1H  
P1 14.27 usec  
PLW1 15.0000000 W

F2 - Processing parameters  
SI 65536  
SF 400.2580438 MHz  
WDW EM  
SSB 0  
LB 0.30 Hz  
GB 0  
PC 1.00

Signature SIF VIT VELLORE  
NR-418-TD-N

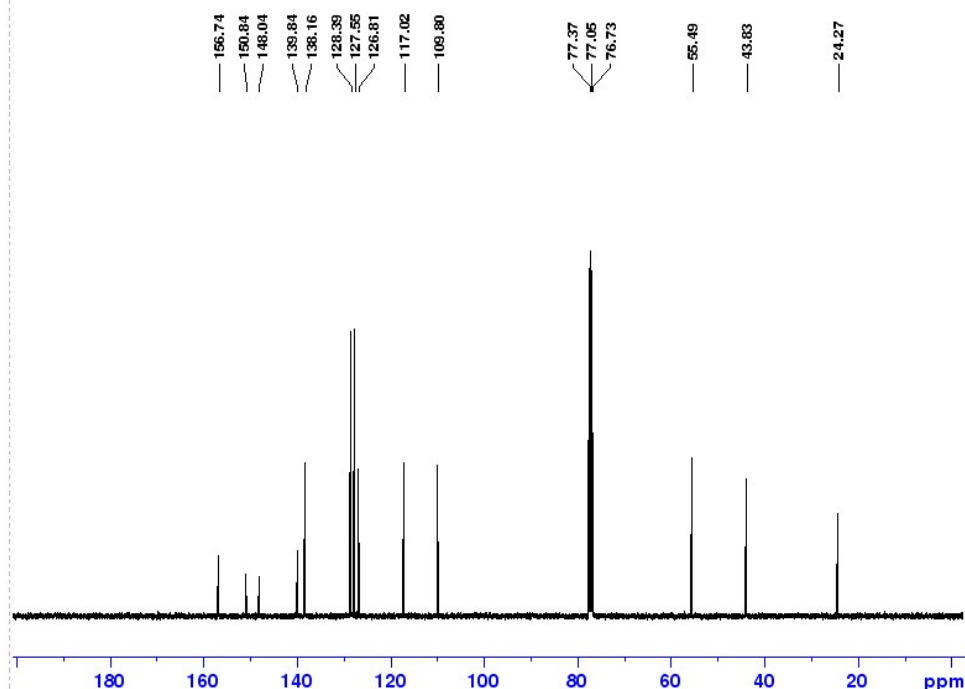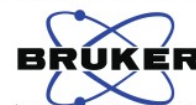

Current Data Parameters  
NAME 6-Methyl Amino Pyrid  
EXPNO 14  
PROCNO 1

F2 - Acquisition Parameters  
Date\_ 20180426  
Time 8.13 h  
INSTRUM spect  
PROBHD Z108618\_0505 (  
PULPROG zgpg30  
TD 65536  
SOLVENT CDCl3  
NS 512  
DS 4  
SWH 24038.461 Hz  
FIDRES 0.733596 Hz  
AQ 1.3631488 sec  
RG 143.73  
DW 20.800 usec  
DE 6.50 usec  
TE 298.8 K  
D1 2.0000000 sec  
D11 0.0300000 sec  
TD0 1  
SFO1 100.6550186 MHz  
NUC1 13C  
P1 9.80 usec  
PLW1 58.0000000 W  
SFO2 400.2596010 MHz  
NUC2 1H  
CPDPRG[2] waltz16  
PCPD2 90.00 usec  
PLW2 15.0000000 W  
PLW12 0.37709999 W  
PLW13 0.18968000 W

F2 - Processing parameters  
SI 32768  
SF 100.6449542 MHz  
WDW EM  
SSB 0  
LB 1.00 Hz  
GB 0  
PC 1.40

<sup>1</sup>H and <sup>13</sup>C NMR spectra of compound 4n

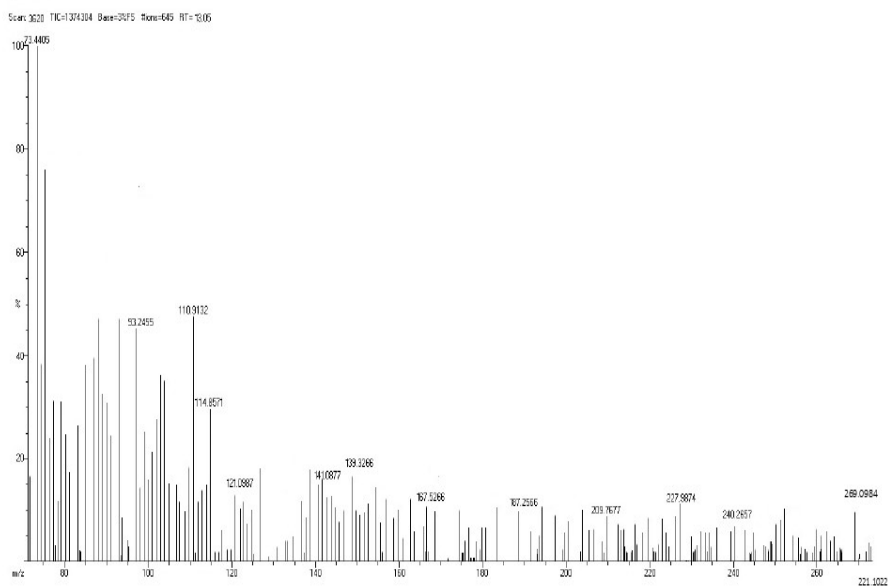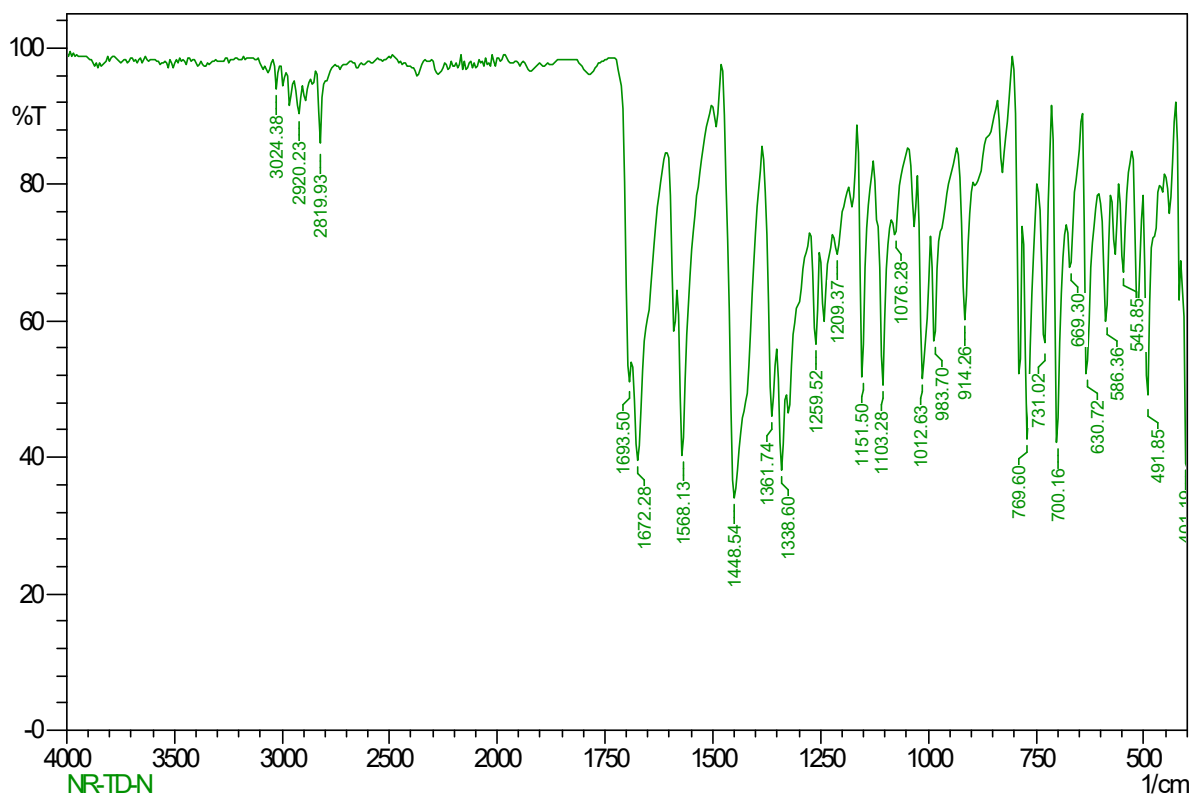

HRMS and IR spectra compound 4n

Signature SIF VIT VELLORE  
NR-TD-518-P

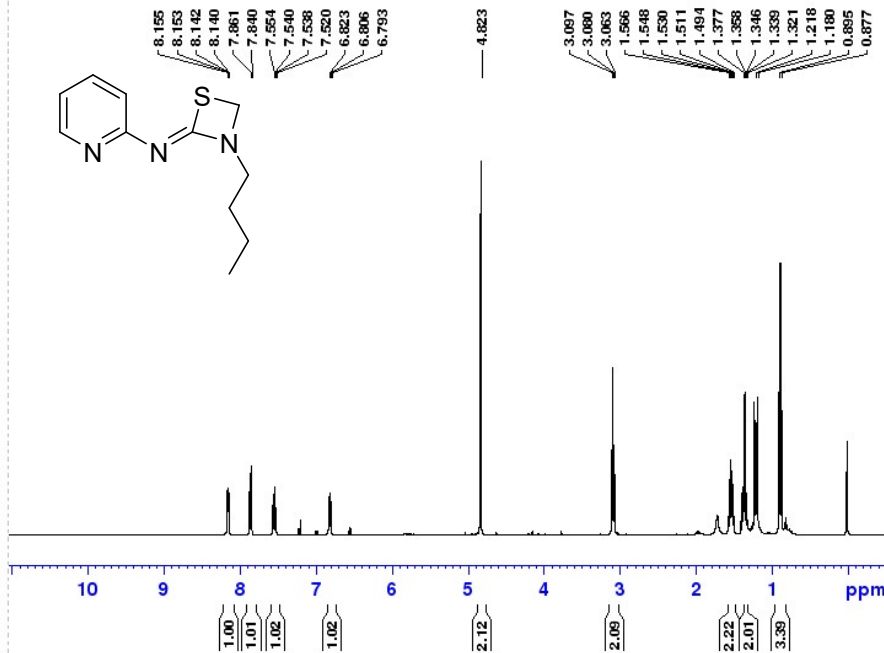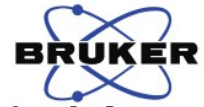

Current Data Parameters  
NAME Amino pyridine  
EXPNO 7  
PROCNO 1

F2 - Acquisition Parameters  
Date\_ 20180515  
Time 20.21 h  
INSTRUM spect  
PROBHD Z108618\_0505 (  
PULPROG zg30  
TD 65536  
SOLVENT CDCl3  
NS 16  
DS 2  
SWH 8012.820 Hz  
FIDRES 0.244532 Hz  
AQ 4.0894465 sec  
RG 71.13  
DW 62.400 usec  
DE 6.50 usec  
TE 297.7 K  
D1 1.00000000 sec  
TD0 1  
SFO1 400.2604716 MHz  
NUC1 1H  
P1 14.27 usec  
PLW1 15.00000000 W

F2 - Processing parameters  
SI 65536  
SF 400.2580365 MHz  
WDW EM  
SSB 0  
LB 0.30 Hz  
GB 0  
PC 1.00

Signature SIF VIT VELLORE  
NR-TD-518-P

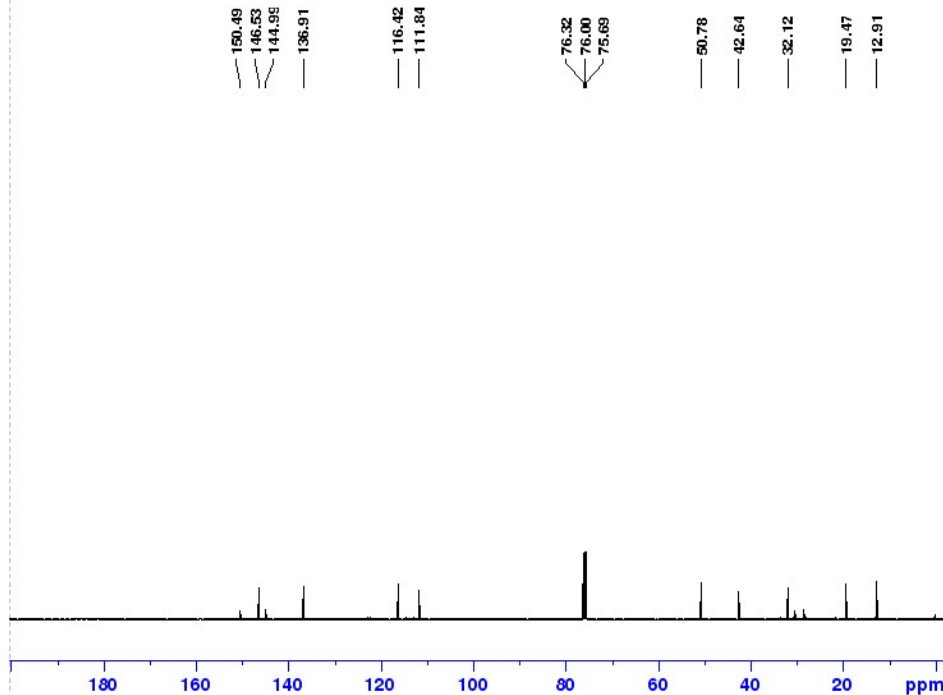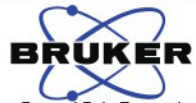

Current Data Parameters  
NAME Amino pyridine  
EXPNO 8  
PROCNO 1

F2 - Acquisition Parameters  
Date\_ 20180515  
Time 20.52 h  
INSTRUM spect  
PROBHD Z108618\_0505 (  
PULPROG zgpg30  
TD 65536  
SOLVENT CDCl3  
NS 512  
DS 4  
SWH 24038.461 Hz  
FIDRES 0.733596 Hz  
AQ 1.3631488 sec  
RG 77.73  
DW 20.800 usec  
DE 6.50 usec  
TE 298.2 K  
D1 2.00000000 sec  
D11 0.03000000 sec  
TD0 1  
SFO1 100.6550186 MHz  
NUC1 13C  
P1 9.80 usec  
PLW1 58.00000000 W  
SFO2 400.2596010 MHz  
NUC2 1H  
CPDPRG2 waltz16  
PCPD2 90.00 usec  
PLW2 15.00000000 W  
PLW12 0.37709999 W  
PLW13 0.18968000 W

F2 - Processing parameters  
SI 32768  
SF 100.6450592 MHz  
WDW EM  
SSB 0  
LB 1.00 Hz  
GB 0  
PC 1.40

<sup>1</sup>H and <sup>13</sup>C NMR spectra of compound 40

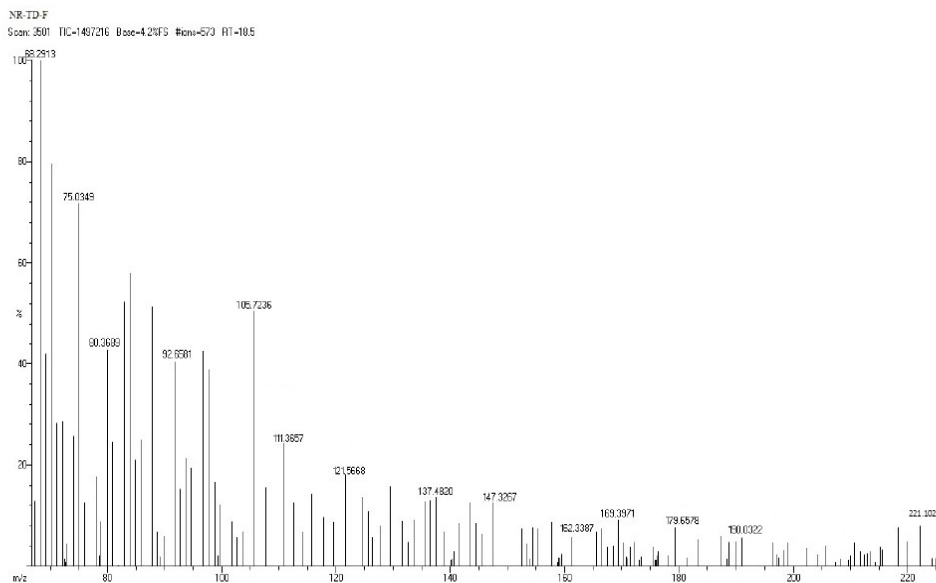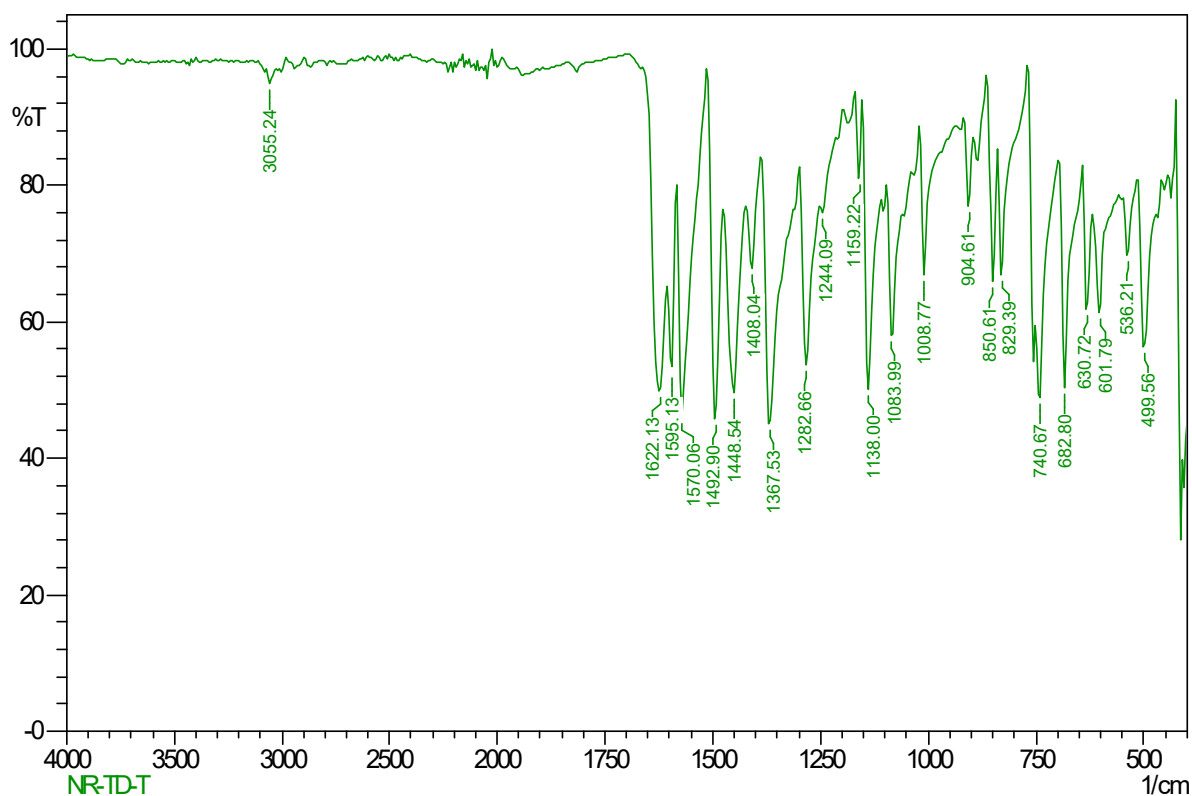

**HRMS and IR spectra compound 4o**

Signature SIF VIT VELLORE  
NR-518-TD-R

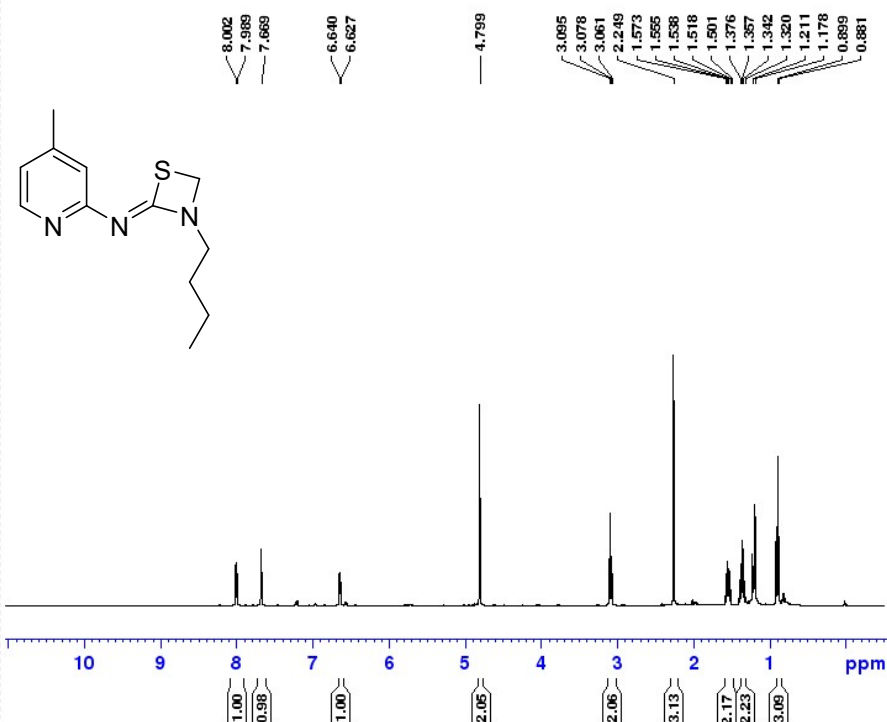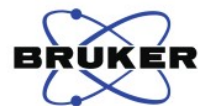

Current Data Parameters  
NAME 4-Methyl Amino Pyridi  
EXPNO 16  
PROCNO 1

F2 - Acquisition Parameters  
Date\_ 20180519  
Time 10.31 h  
INSTRUM spect  
PROBHD Z108618\_0505 (  
PULPROG zg30  
TD 65536  
SOLVENT CDCl3  
NS 16  
DS 2  
SWH 8012.820 Hz  
FIDRES 0.244532 Hz  
AQ 4.0894465 sec  
RG 56.08  
DW 62.400 usec  
DE 6.50 usec  
TE 299.3 K  
D1 1.0000000 sec  
TD0 1  
SFO1 400.2604716 MHz  
NUC1 1H  
P1 14.27 usec  
PLW1 15.0000000 W

F2 - Processing parameters  
SI 65536  
SF 400.2580366 MHz  
WDW EM  
SSB 0  
LB 0.30 Hz  
GB 0  
PC 1.00

Signature SIF VIT VELLORE  
NR-518-TD-R

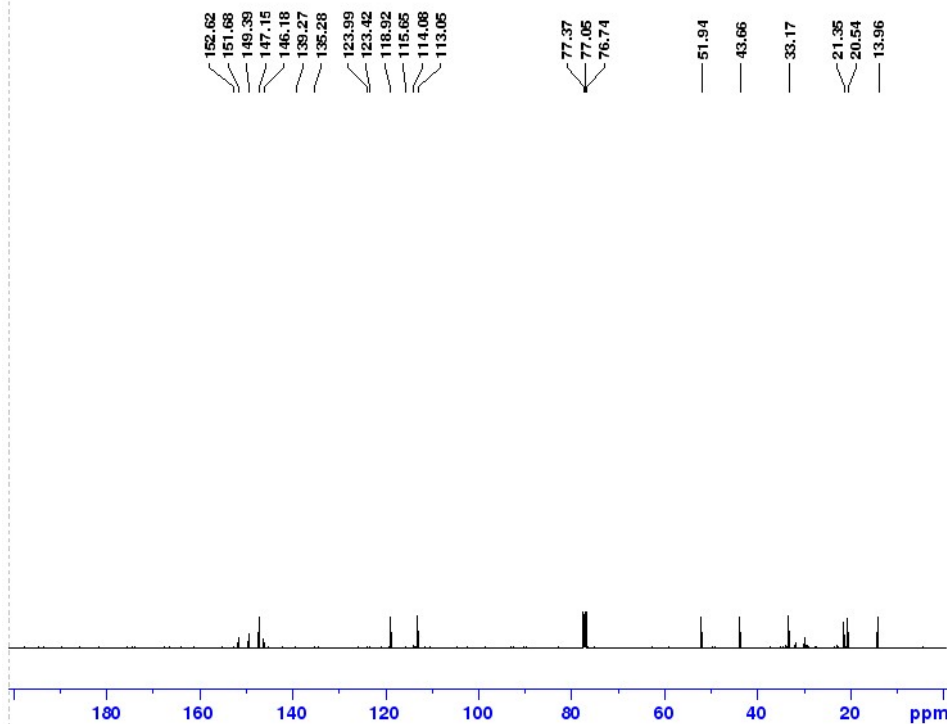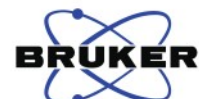

Current Data Parameters  
NAME 4-Methyl Amino Pyridi  
EXPNO 17  
PROCNO 1

F2 - Acquisition Parameters  
Date\_ 20180519  
Time 13.30 h  
INSTRUM spect  
PROBHD Z108618\_0505 (  
PULPROG zgpg30  
TD 65536  
SOLVENT CDCl3  
NS 512  
DS 4  
SWH 24038.461 Hz  
FIDRES 0.733596 Hz  
AQ 1.3631488 sec  
RG 175.97  
DW 20.800 usec  
DE 6.50 usec  
TE 300.2 K  
D1 2.0000000 sec  
D11 0.0300000 sec  
TD0 1  
SFO1 100.6550186 MHz  
NUC1 13C  
P1 9.80 usec  
PLW1 58.0000000 W  
SFO2 400.2596010 MHz  
NUC2 1H  
CPDPRG2 waltz16  
PCPD2 90.00 usec  
PLW2 15.0000000 W  
PLW12 0.37709999 W  
PLW13 0.18968000 W

F2 - Processing parameters  
SI 32768  
SF 100.6449542 MHz  
WDW EM  
SSB 0  
LB 1.00 Hz  
GB 0  
PC 1.40

$^1\text{H}$  and  $^{13}\text{C}$  NMR spectra of compound 4p.



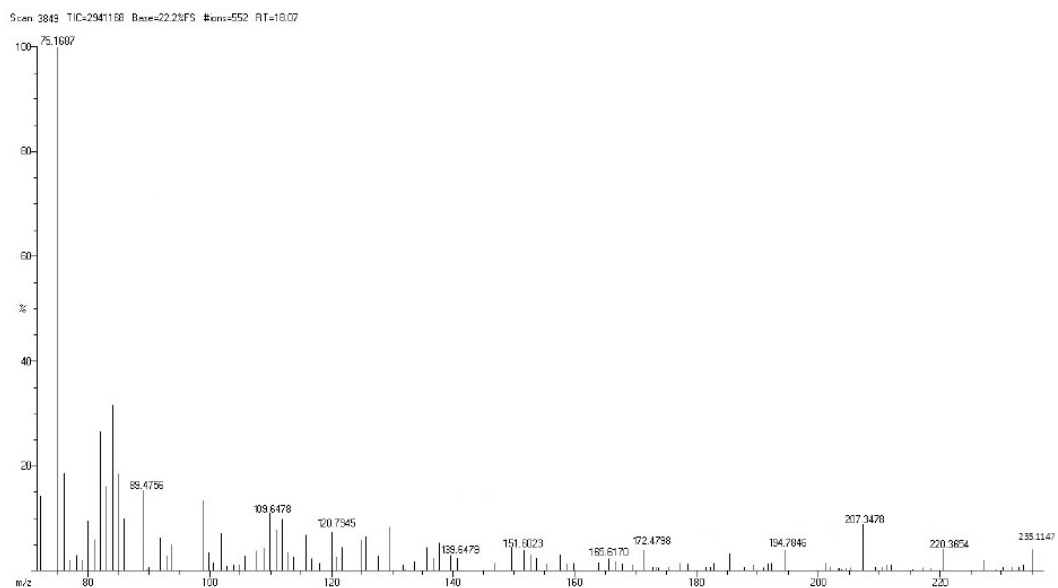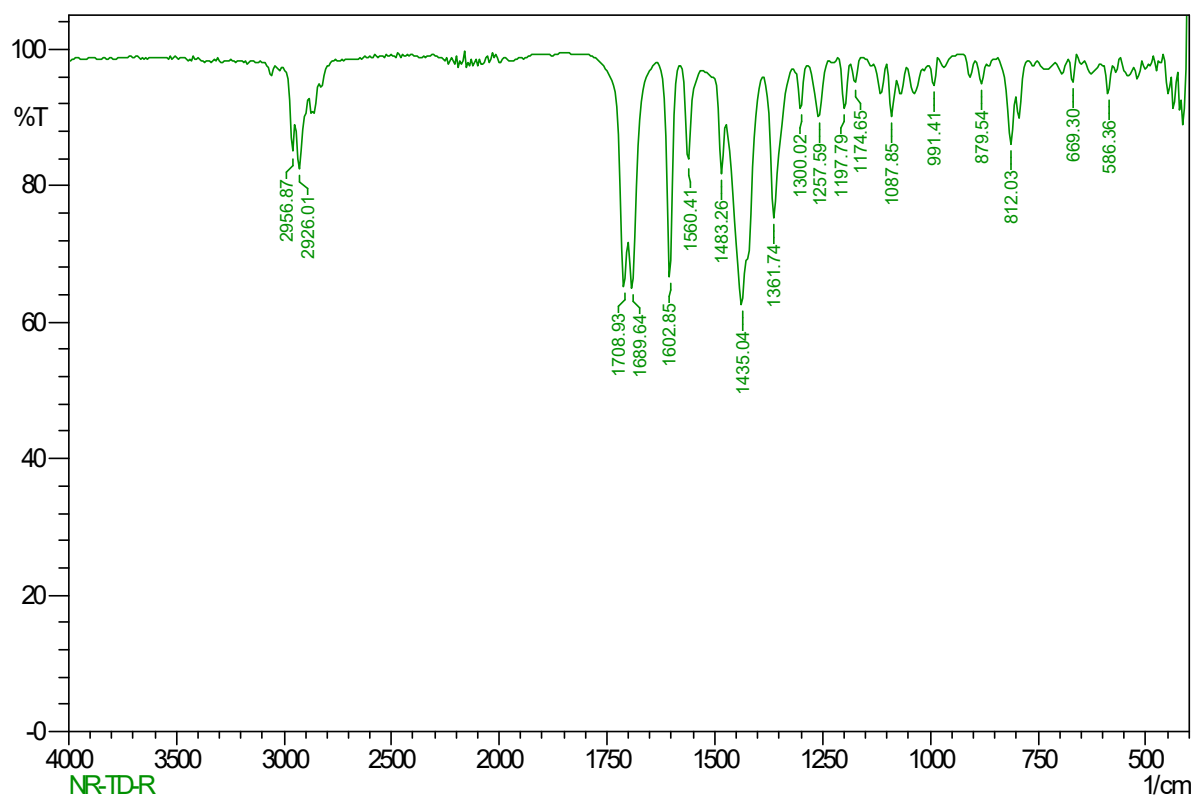

**HRMS and IR spectra compound 4p.**

Signature SIF VIT VELLORE  
TD-Q

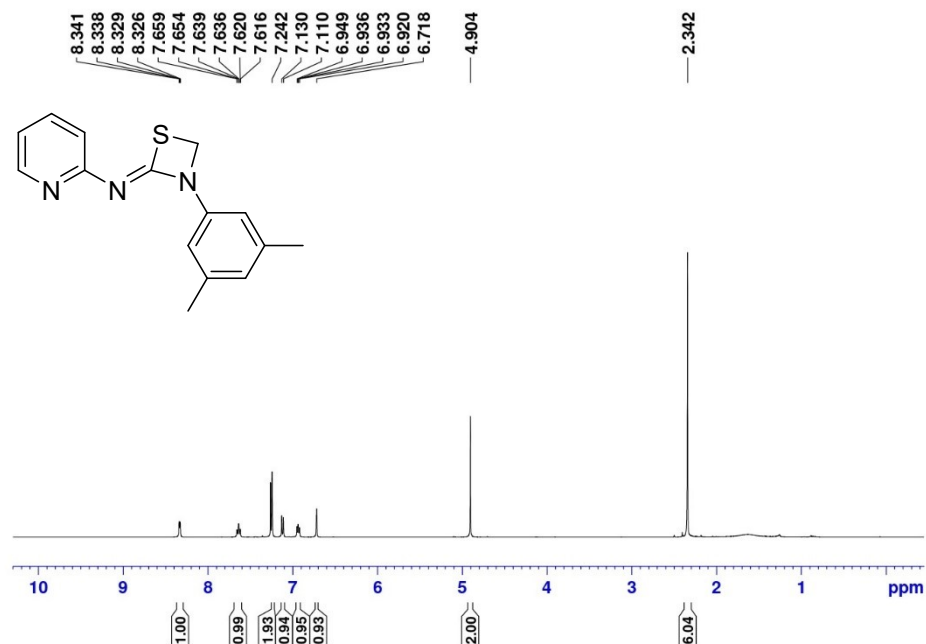

Current Data Parameters  
NAME VITCBM2702224  
EXPNO 39  
PROCNO 1

F2 - Acquisition Parameters  
Date\_ 20240227  
Time 16.50 h  
INSTRUM spect  
PROBHD Z108618\_0505 (  
PULPROG zg30  
TD 65536  
SOLVENT CDCI3  
NS 32  
DS 2  
SWH 8012.820 Hz  
FIDRES 0.244532 Hz  
AQ 4.0894465 sec  
RG 175.97  
DW 62.400 usec  
DE 6.50 usec  
TE 303.2 K  
D1 1.0000000 sec  
TD0 1  
SFO1 400.2604716 MHz  
NUC1 1H  
P1 15.00 usec  
PLW1 15.21399975 W

F2 - Processing parameters  
SI 65536  
SF 400.2580098 MHz  
WDW EM  
SSB 0  
LB 0.30 Hz  
GB 0  
PC 1.00

Signature SIF VIT VELLORE  
TD-Q

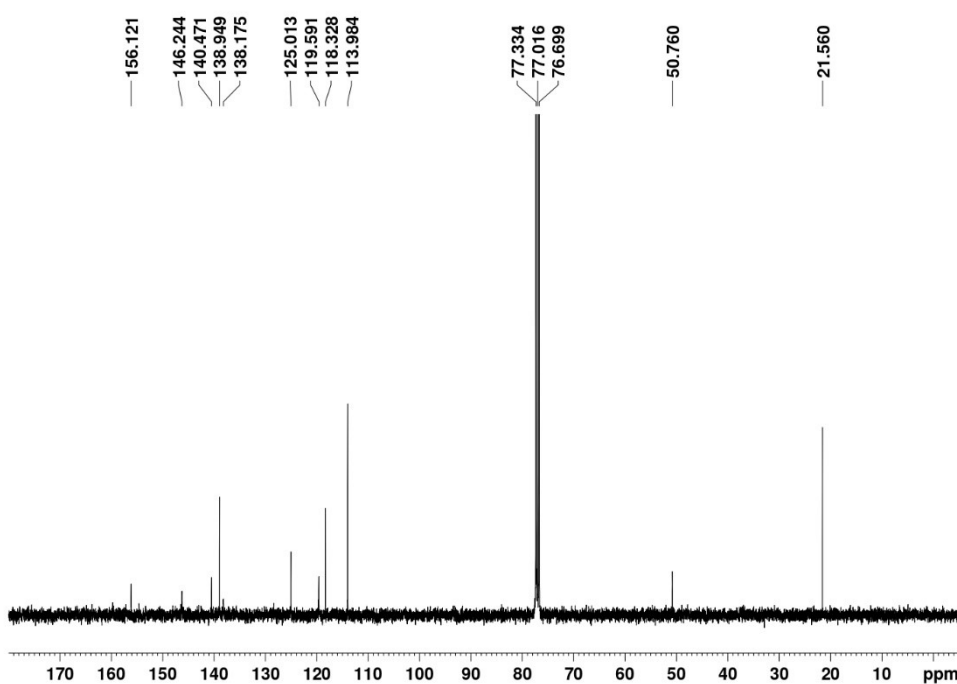

Current Data Parameters  
NAME VITCBM2802224  
EXPNO 43  
PROCNO 1

F2 - Acquisition Parameters  
Date\_ 20240229  
Time 8.24 h  
INSTRUM spect  
PROBHD Z108618\_0505 (  
PULPROG zgpg30  
TD 65536  
SOLVENT CDCI3  
NS 512  
DS 4  
SWH 24038.461 Hz  
FIDRES 0.733596 Hz  
AQ 1.3631488 sec  
RG 199.6  
DW 20.800 usec  
DE 6.50 usec  
TE 306.8 K  
D1 2.0000000 sec  
D11 0.0300000 sec  
TD0 1  
SFO1 100.6550186 MHz  
NUC1 13C  
P1 10.00 usec  
PLW1 56.49300003 W  
SFO2 400.2596010 MHz  
NUC2 1H  
CPDPRG[2] waltz16  
PCPD2 90.00 usec  
PLW2 15.21399975 W  
PLW12 0.42261001 W  
PLW13 0.21257000 W

F2 - Processing parameters  
SI 32768  
SF 100.6449542 MHz  
WDW EM  
SSB 0  
LB 1.00 Hz  
GB 0  
PC 1.40

<sup>1</sup>H and <sup>13</sup>C NMR spectra of compound 4q.

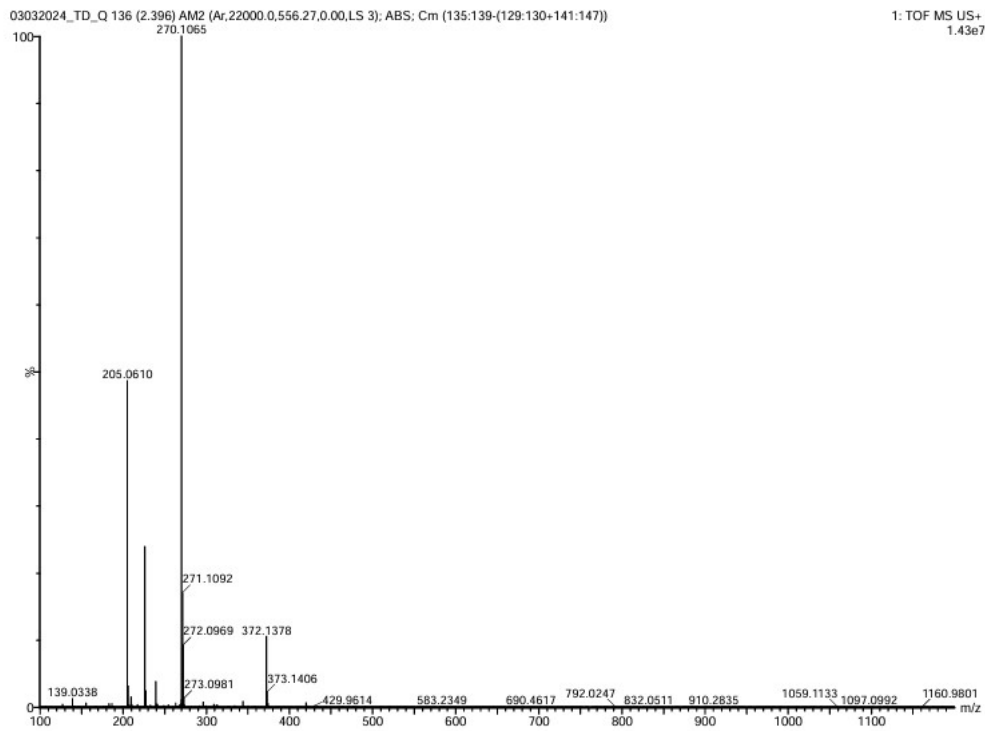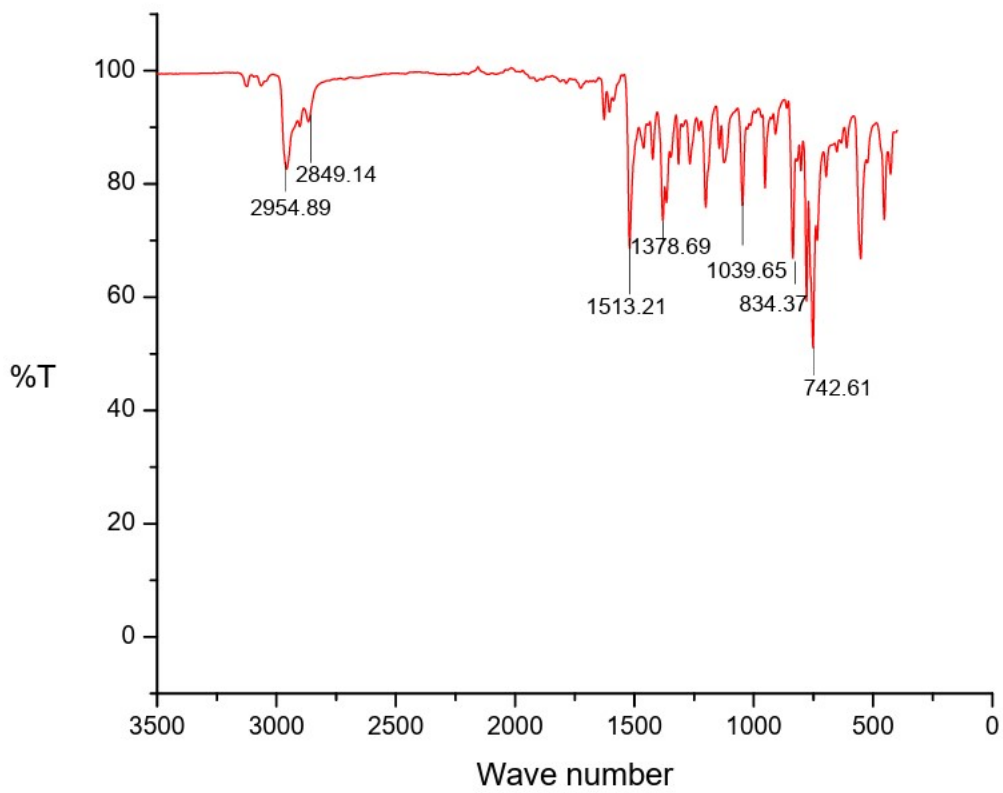

**HRMS and IR spectra compound 4q.**

Signature SIF VIT VELLORE  
TD-R

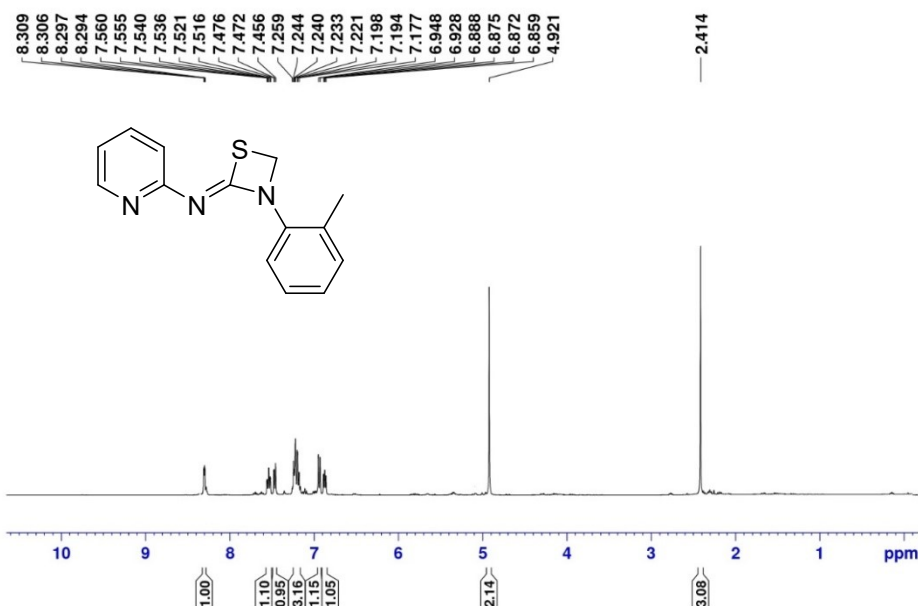

Current Data Parameters  
NAME VITCBM280224  
EXPNO 41  
PROCNO 1

F2 - Acquisition Parameters  
Date\_ 20240228  
Time 17.27 h  
INSTRUM spect  
PROBHD Z108618\_0505 (  
PULPROG zg30  
TD 65536  
SOLVENT CDCl3  
NS 16  
DS 2  
SWH 8012.820 Hz  
FIDRES 0.244532 Hz  
AQ 4.0894465 sec  
RG 35.49  
DW 62.400 usec  
DE 6.50 usec  
TE 302.9 K  
D1 1.00000000 sec  
TD0 1  
SFO1 400.2604716 MHz  
NUC1 1H  
P1 15.00 usec  
PLW1 15.21399975 W

F2 - Processing parameters  
SI 65536  
SF 400.2580160 MHz  
WDW EM  
SSB 0  
LB 0.30 Hz  
GB 0  
PC 1.00

Signature SIF VIT VELLORE  
TD-R

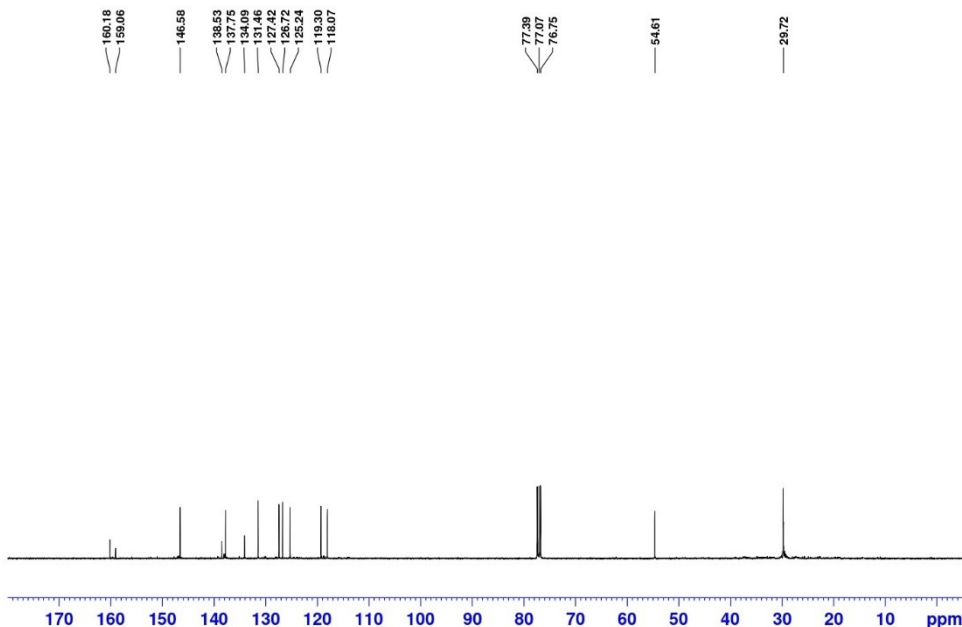

Current Data Parameters  
NAME VITCBM2902224  
EXPNO 44  
PROCNO 1

F2 - Acquisition Parameters  
Date\_ 20240301  
Time 5.55 h  
INSTRUM spect  
PROBHD Z108618\_0505 (  
PULPROG zgpg30  
TD 65536  
SOLVENT CDCl3  
NS 512  
DS 4  
SWH 24038.461 Hz  
FIDRES 0.733596 Hz  
AQ 1.3631488 sec  
RG 199.6  
DW 20.800 usec  
DE 6.50 usec  
TE 307.1 K  
D1 2.00000000 sec  
D11 0.03000000 sec  
TD0 1  
SFO1 100.6550186 MHz  
NUC1 13C  
P1 10.00 usec  
PLW1 56.49300003 W  
SFO2 400.2596010 MHz  
NUC2 1H  
CPDPRG[2] waltz16  
PCPD2 90.00 usec  
PLW2 15.21399975 W  
PLW12 0.42261001 W  
PLW13 0.21257000 W

F2 - Processing parameters  
SI 32768  
SF 100.6449542 MHz  
WDW EM  
SSB 0  
LB 1.00 Hz  
GB 0  
PC 1.40

<sup>1</sup>H and <sup>13</sup>C NMR spectra of compound 4r.

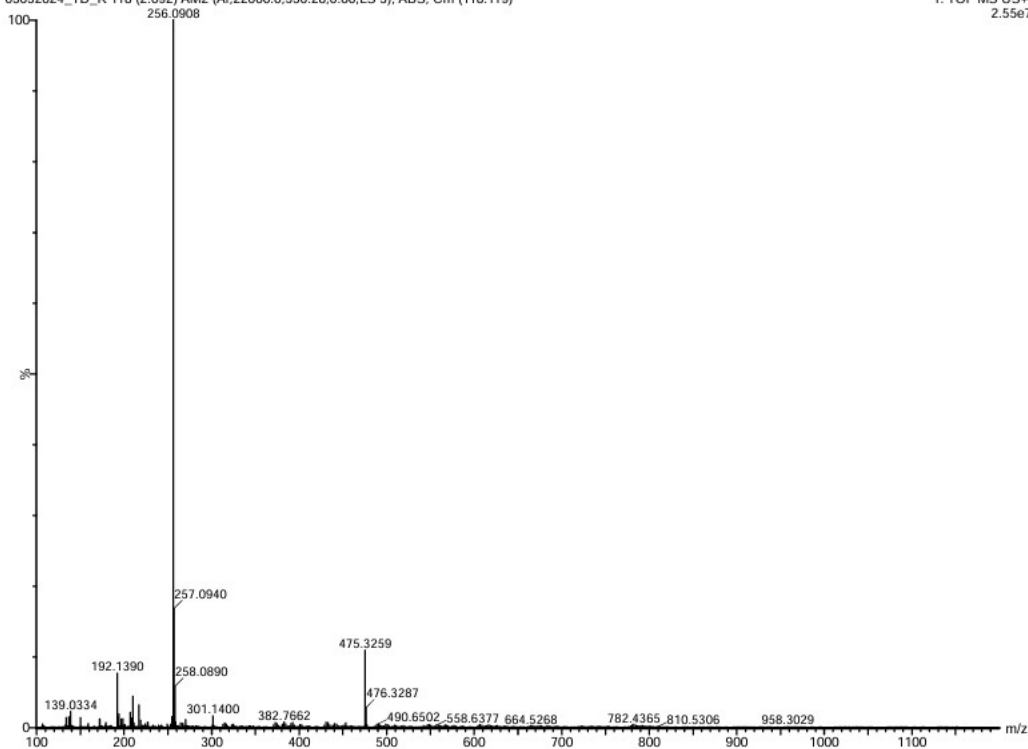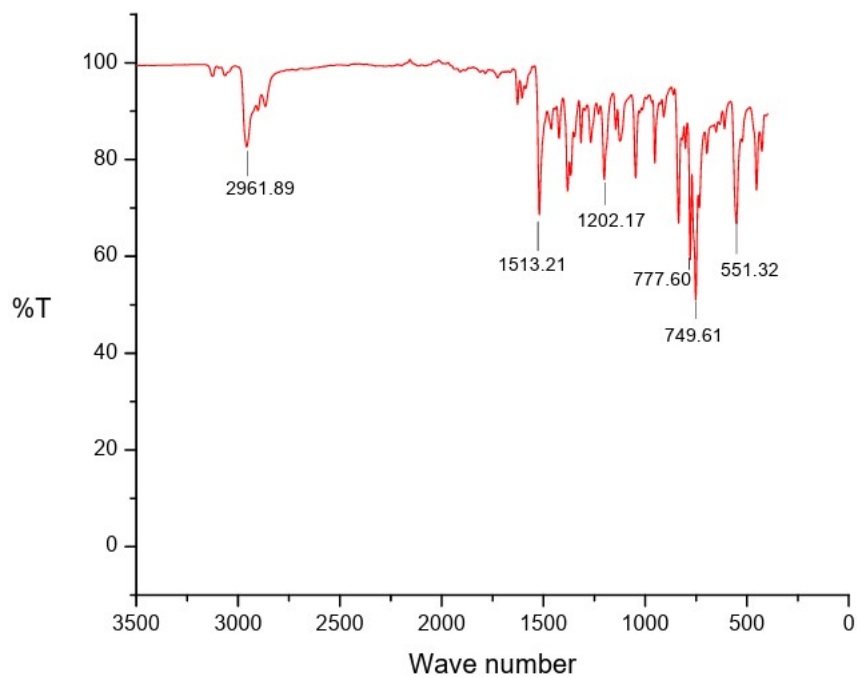

**HRMS and IR spectra compound 4r.**

Table 1. Crystal data and structure refinement of compound **4g**

|                                                                            |                                                  |
|----------------------------------------------------------------------------|--------------------------------------------------|
| Chemical formula                                                           | C <sub>12</sub> H <sub>10</sub> N <sub>4</sub> S |
| $M_r$                                                                      | 242.30                                           |
| Crystal system, space group                                                | Triclinic, <i>P</i> 1                            |
| Temperature (K)                                                            | 293                                              |
| $a, b, c$ (Å)                                                              | 9.7029 (7), 10.6515 (7), 11.9141 (8)             |
| $\alpha, \beta, \gamma$ (°)                                                | 77.212 (2), 73.407 (2), 74.174 (2)               |
| $V$ (Å <sup>3</sup> )                                                      | 1121.49 (13)                                     |
| $Z$                                                                        | 4                                                |
| Radiation type                                                             | Mo $K\alpha$                                     |
| $\mu$ (mm <sup>-1</sup> )                                                  | 0.27                                             |
| Crystal size (mm)                                                          | 0.21 × 0.18 × 0.15                               |
| Data collection                                                            |                                                  |
| Diffractometer                                                             | Bruker <i>APEX-II</i> CCD diffractometer         |
| Absorption correction                                                      | Multi-scan<br>Bruker AXS <i>SADABS</i> program   |
| $T_{\min}, T_{\max}$                                                       | 0.944, 0.959                                     |
| No. of measured, independent and observed [ $I > 2\sigma(I)$ ] reflections | 17727, 4598, 4052                                |
| $R_{\text{int}}$                                                           | 0.020                                            |
| $(\sin \theta/\lambda)_{\text{max}}$ (Å <sup>-1</sup> )                    | 0.626                                            |
| Refinement                                                                 |                                                  |
| $R[F^2 > 2\sigma(F^2)], wR(F^2), S$                                        | 0.038, 0.114, 1.12                               |
| No. of reflections                                                         | 4598                                             |
| No. of parameters                                                          | 307                                              |
| No. of restraints                                                          | 0                                                |
| H-atom treatment                                                           | H-atom parameters constrained                    |
| $\Delta\rho_{\text{max}}, \Delta\rho_{\text{min}}$ (e Å <sup>-3</sup> )    | 0.25, -0.36                                      |

|                                   |            |                                       |            |
|-----------------------------------|------------|---------------------------------------|------------|
| a = 9.7029(0.0007)                |            | alpha= 77.21(0.00)                    |            |
| b = 10.6515(0.0007)               |            | beta = 73.41(0.00)                    |            |
| c = 11.9141(0.0008)               |            | gamma= 74.17(0.00)                    |            |
| V = 1121.49( 0.13) cubic-Angstrom |            |                                       |            |
| Niggli reduced cell:              |            | 9.703 10.651 11.914 77.21 73.41 74.17 |            |
| Niggli matrix:                    |            | 94.1463 113.4544 141.9458             |            |
|                                   |            | 28.0893 33.0124 28.1854               |            |
| Transformation matrix:            |            | 1.00 0.00 0.00                        |            |
|                                   |            | 0.00 1.00 0.00                        |            |
|                                   |            | 0.00 0.00 1.00                        |            |
| Number of Atoms 54                |            |                                       |            |
| Atomic coordinates                |            |                                       |            |
| S1                                | 0.81801(0) | 0.13405(0)                            | 0.73670(0) |
| N1                                | 1.07944(0) | -0.04469(0)                           | 0.65543(0) |
| N2                                | 1.36149(0) | -0.11364(0)                           | 0.51074(0) |
| N3                                | 1.04897(0) | 0.16473(0)                            | 0.53250(0) |
| N4                                | 0.82121(0) | 0.31836(0)                            | 0.58773(0) |
| C1                                | 1.13234(0) | 0.03965(0)                            | 0.56325(0) |
| C2                                | 1.16812(0) | -0.16373(0)                           | 0.67319(0) |
| H2                                | 1.13492(0) | -0.22543(0)                           | 0.73675(0) |
| C3                                | 1.30550(0) | -0.19833(0)                           | 0.60175(0) |
| H3                                | 1.36176(0) | -0.28335(0)                           | 0.61685(0) |
| C4                                | 1.27500(0) | 0.00440(0)                            | 0.49291(0) |
| H4                                | 1.31035(0) | 0.06671(0)                            | 0.43102(0) |
| C5                                | 0.92278(0) | 0.20222(0)                            | 0.60032(0) |
| C6                                | 0.70403(0) | 0.29664(0)                            | 0.69329(0) |
| H6A                               | 0.61369(0) | 0.29233(0)                            | 0.67611(0) |
| H6B                               | 0.68403(0) | 0.35797(0)                            | 0.74826(0) |
| C7                                | 0.82080(0) | 0.42991(0)                            | 0.49964(0) |
| C8                                | 0.94233(0) | 0.43993(0)                            | 0.40468(0) |
| H8                                | 1.02602(0) | 0.37132(0)                            | 0.39791(0) |
| C9                                | 0.93795(0) | 0.55214(0)                            | 0.32069(0) |
| H9                                | 1.01902(0) | 0.55868(0)                            | 0.25701(0) |
| C10                               | 0.81490(0) | 0.65482(0)                            | 0.32990(0) |
| H10                               | 0.81277(0) | 0.73014(0)                            | 0.27274(0) |
| C11                               | 0.69510(0) | 0.64501(0)                            | 0.42439(0) |
| H11                               | 0.61229(0) | 0.71446(0)                            | 0.43116(0) |
| C12                               | 0.69671(0) | 0.53328(0)                            | 0.50911(0) |
| H12                               | 0.61503(0) | 0.52719(0)                            | 0.57232(0) |
| S2                                | 0.68538(0) | 0.66542(0)                            | 0.77645(0) |
| N5                                | 0.41962(0) | 0.57993(0)                            | 0.85778(0) |
| N6                                | 0.13176(0) | 0.59322(0)                            | 0.99572(0) |
| N7                                | 0.45077(0) | 0.71726(0)                            | 0.97686(0) |
| N8                                | 0.68183(0) | 0.77830(0)                            | 0.92495(0) |

|                                                            |                 |                 |                |
|------------------------------------------------------------|-----------------|-----------------|----------------|
| C13                                                        | 0.36586(0)      | 0.65052(0)      | 0.94630(0)     |
| C14                                                        | 0.32973(0)      | 0.51388(0)      | 0.84133(0)     |
| H14                                                        | 0.36403(0)      | 0.46307(0)      | 0.78059(0)     |
| C15                                                        | 0.18959(0)      | 0.51781(0)      | 0.90994(0)     |
| H15                                                        | 0.13316(0)      | 0.46704(0)      | 0.89679(0)     |
| C16                                                        | 0.22025(0)      | 0.65890(0)      | 1.01256(0)     |
| H16                                                        | 0.18392(0)      | 0.71286(0)      | 1.07094(0)     |
| C17                                                        | 0.57901(0)      | 0.72166(0)      | 0.91096(0)     |
| C18                                                        | 0.80025(0)      | 0.74774(0)      | 0.82097(0)     |
| H18A                                                       | 0.88907(0)      | 0.68874(0)      | 0.83983(0)     |
| H18B                                                       | 0.82297(0)      | 0.82526(0)      | 0.76557(0)     |
| C19                                                        | 0.68162(0)      | 0.84704(0)      | 1.01288(0)     |
| C20                                                        | 0.80742(0)      | 0.88811(0)      | 1.00808(0)     |
| H20                                                        | 0.89181(0)      | 0.86893(0)      | 0.94787(0)     |
| C21                                                        | 0.80630(0)      | 0.95778(0)      | 1.09353(0)     |
| H21                                                        | 0.89054(0)      | 0.98558(0)      | 1.09016(0)     |
| C22                                                        | 0.68300(0)      | 0.98658(0)      | 1.18327(0)     |
| H22                                                        | 0.68326(0)      | 1.03392(0)      | 1.24005(0)     |
| C23                                                        | 0.55870(0)      | 0.94464(0)      | 1.18833(0)     |
| H23                                                        | 0.47526(0)      | 0.96306(0)      | 1.24951(0)     |
| C24                                                        | 0.55643(0)      | 0.87565(0)      | 1.10380(0)     |
| H24                                                        | 0.47170(0)      | 0.84844(0)      | 1.10759(0)     |
| Orthogonal coordinates (Angstrom)                          |                 |                 |                |
| Orthogonalization matrix:                                  |                 |                 |                |
| a b cosgamma c cosbeta 9.70290 2.90484 3.40233             |                 |                 |                |
| 0 b singamma -c sinbeta cosalpha* 0.00000 10.24775 1.77659 |                 |                 |                |
| 0 0 c sinbeta sinalpha* 0.00000 0.00000 11.27890           |                 |                 |                |
| Atom                                                       | X               | Y               | Z              |
| S1                                                         | 10.8330(0.0001) | 2.6825(0.0001)  | 8.3092(0.0001) |
| N1                                                         | 12.5739(0.0001) | 0.7065(0.0001)  | 7.3925(0.0001) |
| N2                                                         | 14.6180(0.0001) | -0.2572(0.0001) | 5.7606(0.0001) |
| N3                                                         | 12.4683(0.0001) | 2.6341(0.0001)  | 6.0060(0.0001) |
| N4                                                         | 10.8926(0.0001) | 4.3066(0.0001)  | 6.6290(0.0001) |
| C1                                                         | 13.0185(0.0001) | 1.4070(0.0001)  | 6.3528(0.0001) |
| C2                                                         | 13.1490(0.0001) | -0.4819(0.0001) | 7.5928(0.0001) |
| H2                                                         | 12.8638(0.0001) | -1.0012(0.0001) | 8.3097(0.0001) |
| C3                                                         | 14.1384(0.0001) | -0.9634(0.0001) | 6.7871(0.0001) |
| H3                                                         | 14.4887(0.0001) | -1.8078(0.0001) | 6.9574(0.0001) |
| C4                                                         | 14.0610(0.0001) | 0.9208(0.0001)  | 5.5595(0.0001) |
| H4                                                         | 14.3744(0.0001) | 1.4494(0.0001)  | 4.8614(0.0001) |
| C5                                                         | 11.5835(0.0001) | 3.1388(0.0001)  | 6.7710(0.0001) |
| C6                                                         | 10.0516(0.0001) | 4.2716(0.0001)  | 7.8196(0.0001) |
| H6A                                                        | 9.1041(0.0001)  | 4.1969(0.0001)  | 7.6258(0.0001) |
| H6B                                                        | 10.2227(0.0001) | 4.9977(0.0001)  | 8.4396(0.0001) |
| C7                                                         | 10.9129(0.0001) | 5.2933(0.0001)  | 5.6354(0.0001) |



|                                                                                                     |                 |                 |                 |        |         |        |
|-----------------------------------------------------------------------------------------------------|-----------------|-----------------|-----------------|--------|---------|--------|
| C8                                                                                                  | 11.7981(0.0001) | 5.2272(0.0001)  | 4.5643(0.0001)  |        |         |        |
| H8                                                                                                  | 12.3878(0.0001) | 4.5121(0.0001)  | 4.4880(0.0001)  |        |         |        |
| C9                                                                                                  | 11.7958(0.0001) | 6.2279(0.0001)  | 3.6170(0.0001)  |        |         |        |
| H9                                                                                                  | 12.3848(0.0001) | 6.1818(0.0001)  | 2.8988(0.0001)  |        |         |        |
| C10                                                                                                 | 10.9315(0.0001) | 7.2965(0.0001)  | 3.7209(0.0001)  |        |         |        |
| H10                                                                                                 | 10.9351(0.0001) | 7.9668(0.0001)  | 3.0762(0.0001)  |        |         |        |
| C11                                                                                                 | 10.0621(0.0001) | 7.3639(0.0001)  | 4.7867(0.0001)  |        |         |        |
| H11                                                                                                 | 9.4833(0.0001)  | 8.0876(0.0001)  | 4.8630(0.0001)  |        |         |        |
| C12                                                                                                 | 10.0414(0.0001) | 6.3694(0.0001)  | 5.7422(0.0001)  |        |         |        |
| H12                                                                                                 | 9.4462(0.0001)  | 6.4193(0.0001)  | 6.4551(0.0001)  |        |         |        |
| S2                                                                                                  | 11.2248(0.0001) | 8.1985(0.0001)  | 8.7575(0.0001)  |        |         |        |
| N5                                                                                                  | 8.6746(0.0001)  | 7.4669(0.0001)  | 9.6748(0.0001)  |        |         |        |
| N6                                                                                                  | 6.3894(0.0001)  | 7.8482(0.0001)  | 11.2306(0.0001) |        |         |        |
| N7                                                                                                  | 9.7809(0.0001)  | 9.0858(0.0001)  | 11.0179(0.0001) |        |         |        |
| N8                                                                                                  | 12.0235(0.0001) | 9.6191(0.0001)  | 10.4324(0.0001) |        |         |        |
| C13                                                                                                 | 8.6592(0.0001)  | 8.3476(0.0001)  | 10.6732(0.0001) |        |         |        |
| C14                                                                                                 | 7.5546(0.0001)  | 6.7608(0.0001)  | 9.4893(0.0001)  |        |         |        |
| H14                                                                                                 | 7.5331(0.0001)  | 6.1322(0.0001)  | 8.8042(0.0001)  |        |         |        |
| C15                                                                                                 | 6.4396(0.0001)  | 6.9230(0.0001)  | 10.2631(0.0001) |        |         |        |
| H15                                                                                                 | 5.6999(0.0001)  | 6.3793(0.0001)  | 10.1148(0.0001) |        |         |        |
| C16                                                                                                 | 7.4961(0.0001)  | 8.5511(0.0001)  | 11.4206(0.0001) |        |         |        |
| H16                                                                                                 | 7.4990(0.0001)  | 9.2078(0.0001)  | 12.0790(0.0001) |        |         |        |
| C17                                                                                                 | 10.8138(0.0001) | 9.0138(0.0001)  | 10.2746(0.0001) |        |         |        |
| C18                                                                                                 | 12.7300(0.0001) | 9.1212(0.0001)  | 9.2596(0.0001)  |        |         |        |
| H18A                                                                                                | 13.4846(0.0001) | 8.5501(0.0001)  | 9.4724(0.0001)  |        |         |        |
| H18B                                                                                                | 12.9872(0.0001) | 9.8172(0.0001)  | 8.6348(0.0001)  |        |         |        |
| C19                                                                                                 | 12.5204(0.0001) | 10.4797(0.0001) | 11.4242(0.0001) |        |         |        |
| C20                                                                                                 | 13.8440(0.0001) | 10.8921(0.0001) | 11.3700(0.0001) |        |         |        |
| H20                                                                                                 | 14.4022(0.0001) | 10.5886(0.0001) | 10.6909(0.0001) |        |         |        |
| C21                                                                                                 | 14.3262(0.0001) | 11.7578(0.0001) | 12.3338(0.0001) |        |         |        |
| H21                                                                                                 | 15.2129(0.0001) | 12.0367(0.0001) | 12.2958(0.0001) |        |         |        |
| C22                                                                                                 | 13.5188(0.0001) | 12.2124(0.0001) | 13.3460(0.0001) |        |         |        |
| H22                                                                                                 | 13.8520(0.0001) | 12.7984(0.0001) | 13.9864(0.0001) |        |         |        |
| C23                                                                                                 | 12.2081(0.0001) | 11.7916(0.0001) | 13.4031(0.0001) |        |         |        |
| H23                                                                                                 | 11.6602(0.0001) | 12.0891(0.0001) | 14.0931(0.0001) |        |         |        |
| C24                                                                                                 | 11.6981(0.0001) | 10.9344(0.0001) | 12.4497(0.0001) |        |         |        |
| H24                                                                                                 | 10.8098(0.0001) | 10.6623(0.0001) | 12.4924(0.0001) |        |         |        |
| Displacement parameters, U(I,J)x10**4<br>exp(-2*pi**2(U11*h**2*(a*)**2+...+2*U12*h*k*(a*)*(b*)+...) |                 |                 |                 |        |         |        |
| Atom                                                                                                | U11             | U22             | U33             | U23    | U13     | U12    |
| S1                                                                                                  | 417(0)          | 492(0)          | 435(0)          | 11(0)  | -7(0)   | -91(0) |
| N1                                                                                                  | 365(0)          | 406(0)          | 523(0)          | -48(0) | -101(0) | -83(0) |
| N2                                                                                                  | 555(0)          | 575(0)          | 518(0)          | -92(0) | 2(0)    | 148(0) |
| N3                                                                                                  | 341(0)          | 377(0)          | 385(0)          | -70(0) | -43(0)  | -15(0) |

|      |        |        |        |         |         |         |
|------|--------|--------|--------|---------|---------|---------|
| N4   | 290(0) | 399(0) | 403(0) | -61(0)  | 13(0)   | -28(0)  |
| C1   | 357(0) | 381(0) | 366(0) | -114(0) | -94(0)  | -36(0)  |
| C2   | 487(0) | 391(0) | 609(0) | -17(0)  | -172(0) | -96(0)  |
| H2   | 600(0) |        |        |         |         |         |
| C3   | 573(0) | 404(0) | 572(0) | -118(0) | -176(0) | 65(0)   |
| H3   | 640(0) |        |        |         |         |         |
| C4   | 481(0) | 520(0) | 420(0) | -42(0)  | 25(0)   | 60(0)   |
| H4   | 650(0) |        |        |         |         |         |
| C5   | 324(0) | 368(0) | 348(0) | -70(0)  | -65(0)  | -79(0)  |
| C6   | 365(0) | 519(0) | 422(0) | -58(0)  | 38(0)   | -36(0)  |
| H6A  | 580(0) |        |        |         |         |         |
| H6B  | 580(0) |        |        |         |         |         |
| C7   | 325(0) | 353(0) | 361(0) | -105(0) | -76(0)  | -42(0)  |
| C8   | 366(0) | 399(0) | 396(0) | -89(0)  | -37(0)  | -28(0)  |
| H8   | 490(0) |        |        |         |         |         |
| C9   | 492(0) | 484(0) | 398(0) | -60(0)  | -42(0)  | -106(0) |
| H9   | 570(0) |        |        |         |         |         |
| C10  | 645(0) | 403(0) | 518(0) | -9(0)   | -190(0) | -55(0)  |
| H10  | 640(0) |        |        |         |         |         |
| C11  | 515(0) | 423(0) | 638(0) | -110(0) | -171(0) | 77(0)   |
| H11  | 660(0) |        |        |         |         |         |
| C12  | 363(0) | 454(0) | 500(0) | -127(0) | -43(0)  | 10(0)   |
| H12  | 560(0) |        |        |         |         |         |
| S2   | 410(0) | 587(0) | 494(0) | -232(0) | 15(0)   | -145(0) |
| N5   | 363(0) | 462(0) | 509(0) | -128(0) | -57(0)  | -124(0) |
| N6   | 405(0) | 831(0) | 548(0) | -164(0) | -31(0)  | -305(0) |
| N7   | 317(0) | 468(0) | 393(0) | -74(0)  | -41(0)  | -158(0) |
| N8   | 278(0) | 463(0) | 405(0) | -107(0) | 16(0)   | -145(0) |
| C13  | 333(0) | 387(0) | 355(0) | -3(0)   | -83(0)  | -113(0) |
| C14  | 450(0) | 486(0) | 567(0) | -164(0) | -105(0) | -131(0) |
| H14  | 580(0) |        |        |         |         |         |
| C15  | 449(0) | 535(0) | 542(0) | -41(0)  | -166(0) | -228(0) |
| H15  | 580(0) |        |        |         |         |         |
| C16  | 378(0) | 727(0) | 470(0) | -192(0) | -1(0)   | -237(0) |
| H16  | 610(0) |        |        |         |         |         |
| C17  | 313(0) | 342(0) | 362(0) | -43(0)  | -66(0)  | -80(0)  |
| C18  | 341(0) | 575(0) | 463(0) | -156(0) | 57(0)   | -176(0) |
| H18A | 560(0) |        |        |         |         |         |
| H18B | 560(0) |        |        |         |         |         |
| C19  | 322(0) | 335(0) | 352(0) | -9(0)   | -61(0)  | -111(0) |
| C20  | 371(0) | 530(0) | 490(0) | -54(0)  | -51(0)  | -204(0) |
| H20  | 550(0) |        |        |         |         |         |
| C21  | 538(0) | 600(0) | 619(0) | -73(0)  | -173(0) | -290(0) |
| H21  | 660(0) |        |        |         |         |         |
| C22  | 674(0) | 488(0) | 493(0) | -91(0)  | -217(0) | -183(0) |

| H22                                                                                                              | 630(0)  |             |        |         |            |                |
|------------------------------------------------------------------------------------------------------------------|---------|-------------|--------|---------|------------|----------------|
| C23                                                                                                              | 498(0)  | 544(0)      | 420(0) | -127(0) | -48(0)     | -118(0)        |
| H23                                                                                                              | 590(0)  |             |        |         |            |                |
| C24                                                                                                              | 366(0)  | 509(0)      | 413(0) | -107(0) | -24(0)     | -157(0)        |
| H24                                                                                                              | 510(0)  |             |        |         |            |                |
| Principal axes of the thermal ellipsoids, Uequiv. ( $\times 10^4 \text{ \AA}^2$ ) and Bequiv. ( $\text{\AA}^2$ ) |         |             |        |         |            |                |
| Atom                                                                                                             | R1      | R2          | R3     | Uequiv. | Bequiv.    | Rmax/Rmin      |
| S1                                                                                                               | 668(0)  | 451(0)      | 334(0) | 484(0)  | 3.82(0.00) | 2              |
| N1                                                                                                               | 542(0)  | 406(0)      | 364(0) | 437(0)  | 3.45(0.00) | 1.49           |
| N2                                                                                                               | 1051(0) | 536(0)      | 311(0) | 633(0)  | 4.99(0.00) | 3.37           |
| N3                                                                                                               | 484(0)  | 391(0)      | 291(0) | 389(0)  | 3.07(0.00) | 1.66           |
| N4                                                                                                               | 539(0)  | 399(0)      | 247(0) | 395(0)  | 3.12(0.00) | 2.18           |
| C1                                                                                                               | 444(0)  | 351(0)      | 306(0) | 367(0)  | 2.90(0.00) | 1.45           |
| C2                                                                                                               | 637(0)  | 473(0)      | 383(0) | 497(0)  | 3.93(0.00) | 1.66           |
| C3                                                                                                               | 733(0)  | 552(0)      | 326(0) | 537(0)  | 4.24(0.00) | 2.25           |
| C4                                                                                                               | 878(0)  | 437(0)      | 313(0) | 543(0)  | 4.29(0.00) | 2.81           |
| C5                                                                                                               | 375(0)  | 348(0)      | 319(0) | 347(0)  | 2.74(0.00) | 1.17           |
| C6                                                                                                               | 678(0)  | 479(0)      | 281(0) | 479(0)  | 3.78(0.00) | 2.42           |
| C7                                                                                                               | 405(0)  | 343(0)      | 292(0) | 347(0)  | 2.74(0.00) | 1.39           |
| C8                                                                                                               | 491(0)  | 421(0)      | 306(0) | 406(0)  | 3.21(0.00) | 1.6            |
| C9                                                                                                               | 562(0)  | 483(0)      | 377(0) | 474(0)  | 3.74(0.00) | 1.49           |
| C10                                                                                                              | 680(0)  | 554(0)      | 369(0) | 534(0)  | 4.22(0.00) | 1.84           |
| C11                                                                                                              | 709(0)  | 630(0)      | 314(0) | 551(0)  | 4.35(0.00) | 2.26           |
| C12                                                                                                              | 568(0)  | 527(0)      | 297(0) | 464(0)  | 3.67(0.00) | 1.91           |
| S2                                                                                                               | 711(0)  | 435(0)      | 332(0) | 493(0)  | 3.89(0.00) | 2.14           |
| N5                                                                                                               | 557(0)  | 418(0)      | 344(0) | 440(0)  | 3.47(0.00) | 1.62           |
| N6                                                                                                               | 875(0)  | 535(0)      | 298(0) | 569(0)  | 4.49(0.00) | 2.94           |
| N7                                                                                                               | 488(0)  | 403(0)      | 269(0) | 387(0)  | 3.05(0.00) | 1.82           |
| N8                                                                                                               | 520(0)  | 403(0)      | 229(0) | 384(0)  | 3.03(0.00) | 2.27           |
| C13                                                                                                              | 438(0)  | 341(0)      | 303(0) | 361(0)  | 2.85(0.00) | 1.45           |
| C14                                                                                                              | 613(0)  | 460(0)      | 385(0) | 486(0)  | 3.84(0.00) | 1.59           |
| C15                                                                                                              | 627(0)  | 512(0)      | 305(0) | 481(0)  | 3.80(0.00) | 2.05           |
| C16                                                                                                              | 781(0)  | 433(0)      | 309(0) | 507(0)  | 4.01(0.00) | 2.53           |
| C17                                                                                                              | 380(0)  | 340(0)      | 308(0) | 343(0)  | 2.71(0.00) | 1.24           |
| C18                                                                                                              | 665(0)  | 471(0)      | 261(0) | 465(0)  | 3.67(0.00) | 2.55           |
| C19                                                                                                              | 400(0)  | 351(0)      | 270(0) | 340(0)  | 2.69(0.00) | 1.48           |
| C20                                                                                                              | 562(0)  | 522(0)      | 290(0) | 458(0)  | 3.62(0.00) | 1.94           |
| C21                                                                                                              | 713(0)  | 609(0)      | 323(0) | 549(0)  | 4.33(0.00) | 2.21           |
| C22                                                                                                              | 692(0)  | 502(0)      | 371(0) | 522(0)  | 4.12(0.00) | 1.86           |
| C23                                                                                                              | 567(0)  | 526(0)      | 383(0) | 492(0)  | 3.88(0.00) | 1.48           |
| C24                                                                                                              | 544(0)  | 417(0)      | 318(0) | 426(0)  | 3.37(0.00) | 1.71           |
| Bond distances (Angstrom)                                                                                        |         |             |        |         |            |                |
| (Corrections following Busing & Levy, Acta Cryst.(1964).17,142)                                                  |         |             |        |         |            |                |
|                                                                                                                  |         | Uncorrected | Lower  | Upper   | Riding     | Non-correlated |

|     |      | Distance  | bound  | bound  | motion | motion |
|-----|------|-----------|--------|--------|--------|--------|
| S1  | -C5  | 1.7714(1) | 1.7727 | 1.8724 | 1.7831 | 1.8226 |
| S1  | -C6  | 1.8372(1) | 1.8372 | 1.9452 | 1.8377 | 1.8912 |
| N1  | -C1  | 1.3302(1) | 1.3307 | 1.4453 | 1.3382 | 1.388  |
| N1  | -C2  | 1.3353(1) | 1.3356 | 1.4857 | 1.3416 | 1.4106 |
| N2  | -C3  | 1.3351(1) | 1.3358 | 1.5023 | 1.3462 | 1.4191 |
| N2  | -C4  | 1.3184(1) | 1.319  | 1.5257 | 1.3288 | 1.4223 |
| N3  | -C1  | 1.3889(1) | 1.389  | 1.5016 | 1.3921 | 1.4453 |
| N3  | -C5  | 1.2738(1) | 1.2741 | 1.398  | 1.2794 | 1.336  |
| N4  | -C5  | 1.3643(1) | 1.3647 | 1.4766 | 1.3705 | 1.4207 |
| N4  | -C6  | 1.4581(1) | 1.4585 | 1.5968 | 1.4661 | 1.5277 |
| N4  | -C7  | 1.4004(1) | 1.4006 | 1.502  | 1.4056 | 1.4513 |
| C1  | -C4  | 1.3974(1) | 1.3998 | 1.5402 | 1.4162 | 1.47   |
| C2  | -H2  | 0.9300(0) |        |        |        |        |
| C2  | -C3  | 1.3638(1) | 1.364  | 1.511  | 1.3682 | 1.4375 |
| C3  | -H3  | 0.9299(1) |        |        |        |        |
| C4  | -H4  | 0.9300(0) |        |        |        |        |
| C6  | -H6A | 0.9700(1) |        |        |        |        |
| C6  | -H6B | 0.9700(0) |        |        |        |        |
| C7  | -C8  | 1.3911(1) | 1.3914 | 1.5026 | 1.3975 | 1.447  |
| C7  | -C12 | 1.3889(1) | 1.3901 | 1.5175 | 1.4012 | 1.4538 |
| C8  | -H8  | 0.9300(1) |        |        |        |        |
| C8  | -C9  | 1.3780(1) | 1.3783 | 1.5066 | 1.3846 | 1.4424 |
| C9  | -H9  | 0.9300(1) |        |        |        |        |
| C9  | -C10 | 1.3783(1) | 1.3786 | 1.5271 | 1.3849 | 1.4529 |
| C10 | -H10 | 0.9300(0) |        |        |        |        |
| C10 | -C11 | 1.3770(1) | 1.3771 | 1.522  | 1.3786 | 1.4495 |
| C11 | -H11 | 0.9298(1) |        |        |        |        |
| C11 | -C12 | 1.3793(1) | 1.3798 | 1.5231 | 1.3881 | 1.4515 |
| C12 | -H12 | 0.9300(1) |        |        |        |        |
| S2  | -C17 | 1.7707(1) | 1.7724 | 1.8709 | 1.7836 | 1.8216 |
| S2  | -C18 | 1.8355(1) | 1.8355 | 1.9442 | 1.8377 | 1.8899 |
| N5  | -C13 | 1.3314(1) | 1.3321 | 1.4465 | 1.3402 | 1.3893 |
| N5  | -C14 | 1.3370(1) | 1.3371 | 1.4878 | 1.3414 | 1.4124 |
| N6  | -C15 | 1.3396(1) | 1.3403 | 1.4852 | 1.3494 | 1.4128 |
| N6  | -C16 | 1.3248(1) | 1.325  | 1.5113 | 1.3317 | 1.4182 |
| N7  | -C13 | 1.3864(1) | 1.3865 | 1.4981 | 1.3904 | 1.4423 |
| N7  | -C17 | 1.2745(1) | 1.2748 | 1.3991 | 1.2807 | 1.337  |
| N8  | -C17 | 1.3619(1) | 1.3622 | 1.4739 | 1.3672 | 1.418  |
| N8  | -C18 | 1.4569(1) | 1.4573 | 1.5908 | 1.4648 | 1.5241 |
| N8  | -C19 | 1.4040(1) | 1.4042 | 1.5012 | 1.4083 | 1.4527 |
| C13 | -C16 | 1.3974(1) | 1.3992 | 1.5353 | 1.4133 | 1.4672 |
| C14 | -H14 | 0.9300(0) |        |        |        |        |
| C14 | -C15 | 1.3668(1) | 1.3668 | 1.511  | 1.3675 | 1.4389 |
| C15 | -H15 | 0.9299(0) |        |        |        |        |

|                              |       |           |        |        |        |        |
|------------------------------|-------|-----------|--------|--------|--------|--------|
| C16                          | -H16  | 0.9300(0) |        |        |        |        |
| C18                          | -H18A | 0.9700(1) |        |        |        |        |
| C18                          | -H18B | 0.9700(1) |        |        |        |        |
| C19                          | -C20  | 1.3874(1) | 1.3886 | 1.5139 | 1.3998 | 1.4512 |
| C19                          | -C24  | 1.3909(1) | 1.3916 | 1.5066 | 1.3999 | 1.4491 |
| C20                          | -H20  | 0.9300(1) |        |        |        |        |
| C20                          | -C21  | 1.3824(1) | 1.383  | 1.5245 | 1.3918 | 1.4538 |
| C21                          | -H21  | 0.9303(1) |        |        |        |        |
| C21                          | -C22  | 1.3722(1) | 1.3723 | 1.5118 | 1.3756 | 1.4421 |
| C22                          | -H22  | 0.9298(0) |        |        |        |        |
| C22                          | -C23  | 1.3778(1) | 1.3778 | 1.5219 | 1.3809 | 1.4499 |
| C23                          | -H23  | 0.9300(1) |        |        |        |        |
| C23                          | -C24  | 1.3798(1) | 1.3801 | 1.517  | 1.386  | 1.4485 |
| C24                          | -H24  | 0.9300(1) |        |        |        |        |
| Number of bond distances: 58 |       |           |        |        |        |        |
| Bond angles (deg)            |       |           |        |        |        |        |
|                              |       |           | Angle  | S.U.   |        |        |
| C5                           | -S1   | -C6       | 74.1   | 0      |        |        |
| C1                           | -N1   | -C2       | 116.23 | 0.01   |        |        |
| C3                           | -N2   | -C4       | 115.98 | 0.01   |        |        |
| C1                           | -N3   | -C5       | 118.38 | 0.01   |        |        |
| C5                           | -N4   | -C6       | 100.75 | 0.01   |        |        |
| C5                           | -N4   | -C7       | 132.03 | 0.01   |        |        |
| C6                           | -N4   | -C7       | 127.21 | 0.01   |        |        |
| N1                           | -C1   | -N3       | 121.88 | 0.01   |        |        |
| N1                           | -C1   | -C4       | 120.66 | 0.01   |        |        |
| N3                           | -C1   | -C4       | 117.47 | 0.01   |        |        |
| N1                           | -C2   | -H2       | 118.72 | 0.01   |        |        |
| N1                           | -C2   | -C3       | 122.55 | 0.01   |        |        |
| H2                           | -C2   | -C3       | 118.73 | 0.01   |        |        |
| N2                           | -C3   | -C2       | 121.88 | 0.01   |        |        |
| N2                           | -C3   | -H3       | 119.07 | 0.01   |        |        |
| C2                           | -C3   | -H3       | 119.06 | 0.01   |        |        |
| N2                           | -C4   | -C1       | 122.65 | 0.01   |        |        |
| N2                           | -C4   | -H4       | 118.68 | 0.01   |        |        |
| C1                           | -C4   | -H4       | 118.67 | 0.01   |        |        |
| S1                           | -C5   | -N3       | 135.54 | 0.01   |        |        |
| S1                           | -C5   | -N4       | 95.52  | 0      |        |        |
| N3                           | -C5   | -N4       | 128.93 | 0.01   |        |        |
| S1                           | -C6   | -N4       | 89.61  | 0      |        |        |
| S1                           | -C6   | -H6A      | 113.71 | 0.01   |        |        |
| S1                           | -C6   | -H6B      | 113.71 | 0.01   |        |        |
| N4                           | -C6   | -H6A      | 113.71 | 0.01   |        |        |
| N4                           | -C6   | -H6B      | 113.71 | 0.01   |        |        |

|     |      |       |        |      |
|-----|------|-------|--------|------|
| H6A | -C6  | -H6B  | 110.95 | 0.01 |
| N4  | -C7  | -C8   | 121.47 | 0.01 |
| N4  | -C7  | -C12  | 118.83 | 0.01 |
| C8  | -C7  | -C12  | 119.69 | 0.01 |
| C7  | -C8  | -H8   | 120.21 | 0.01 |
| C7  | -C8  | -C9   | 119.59 | 0.01 |
| H8  | -C8  | -C9   | 120.2  | 0.01 |
| C8  | -C9  | -H9   | 119.6  | 0.01 |
| C8  | -C9  | -C10  | 120.81 | 0.01 |
| H9  | -C9  | -C10  | 119.59 | 0.01 |
| C9  | -C10 | -H10  | 120.27 | 0.01 |
| C9  | -C10 | -C11  | 119.48 | 0.01 |
| H10 | -C10 | -C11  | 120.25 | 0.01 |
| C10 | -C11 | -H11  | 119.64 | 0.01 |
| C10 | -C11 | -C12  | 120.69 | 0.01 |
| H11 | -C11 | -C12  | 119.67 | 0.01 |
| C7  | -C12 | -C11  | 119.73 | 0.01 |
| C7  | -C12 | -H12  | 120.14 | 0.01 |
| C11 | -C12 | -H12  | 120.13 | 0.01 |
| C17 | -S2  | -C18  | 74.01  | 0    |
| C13 | -N5  | -C14  | 116.34 | 0.01 |
| C15 | -N6  | -C16  | 116.02 | 0.01 |
| C13 | -N7  | -C17  | 118.73 | 0.01 |
| C17 | -N8  | -C18  | 100.7  | 0.01 |
| C17 | -N8  | -C19  | 131.96 | 0.01 |
| C18 | -N8  | -C19  | 127.34 | 0.01 |
| N5  | -C13 | -N7   | 121.96 | 0.01 |
| N5  | -C13 | -C16  | 120.47 | 0.01 |
| N7  | -C13 | -C16  | 117.57 | 0.01 |
| N5  | -C14 | -H14  | 118.59 | 0.01 |
| N5  | -C14 | -C15  | 122.83 | 0.01 |
| H14 | -C14 | -C15  | 118.58 | 0.01 |
| N6  | -C15 | -C14  | 121.43 | 0.01 |
| N6  | -C15 | -H15  | 119.28 | 0.01 |
| C14 | -C15 | -H15  | 119.29 | 0.01 |
| N6  | -C16 | -C13  | 122.77 | 0.01 |
| N6  | -C16 | -H16  | 118.61 | 0.01 |
| C13 | -C16 | -H16  | 118.62 | 0.01 |
| S2  | -C17 | -N7   | 135.55 | 0.01 |
| S2  | -C17 | -N8   | 95.61  | 0    |
| N7  | -C17 | -N8   | 128.84 | 0.01 |
| S2  | -C18 | -N8   | 89.68  | 0    |
| S2  | -C18 | -H18A | 113.7  | 0.01 |
| S2  | -C18 | -H18B | 113.69 | 0.01 |
| N8  | -C18 | -H18A | 113.7  | 0.01 |

|                      |      |       |        |        |      |
|----------------------|------|-------|--------|--------|------|
| N8                   | -C18 | -H18B | 113.7  | 0.01   |      |
| H18A                 | -C18 | -H18B | 110.95 | 0.01   |      |
| N8                   | -C19 | -C20  | 119.49 | 0.01   |      |
| N8                   | -C19 | -C24  | 120.8  | 0.01   |      |
| C20                  | -C19 | -C24  | 119.71 | 0.01   |      |
| C19                  | -C20 | -H20  | 120.28 | 0.01   |      |
| C19                  | -C20 | -C21  | 119.45 | 0.01   |      |
| H20                  | -C20 | -C21  | 120.27 | 0.01   |      |
| C20                  | -C21 | -H21  | 119.46 | 0.01   |      |
| C20                  | -C21 | -C22  | 121.1  | 0.01   |      |
| H21                  | -C21 | -C22  | 119.45 | 0.01   |      |
| C21                  | -C22 | -H22  | 120.39 | 0.01   |      |
| C21                  | -C22 | -C23  | 119.28 | 0.01   |      |
| H22                  | -C22 | -C23  | 120.32 | 0.01   |      |
| C22                  | -C23 | -H23  | 119.57 | 0.01   |      |
| C22                  | -C23 | -C24  | 120.85 | 0.01   |      |
| H23                  | -C23 | -C24  | 119.58 | 0.01   |      |
| C19                  | -C24 | -C23  | 119.61 | 0.01   |      |
| C19                  | -C24 | -H24  | 120.19 | 0.01   |      |
| C23                  | -C24 | -H24  | 120.2  | 0.01   |      |
| Number of angles: 92 |      |       |        |        |      |
| Torsion angles (deg) |      |       |        |        |      |
| Angle                |      |       |        |        |      |
| S.U.                 |      |       |        |        |      |
| C6                   | S1   | C5    | N3     | 179.75 | 0.01 |
| C6                   | S1   | C5    | N4     | 1.05   | 0    |
| C5                   | S1   | C6    | N4     | 0.98   | 0    |
| C5                   | S1   | C6    | H6A    | 114.88 | 0.01 |
| C5                   | S1   | C6    | H6B    | 116.84 | 0.01 |
| C2                   | N1   | C1    | N3     | 177.48 | 0.01 |
| C2                   | N1   | C1    | C4     | 2.06   | 0.01 |
| C1                   | N1   | C2    | H2     | 179.94 | 0.01 |
| C1                   | N1   | C2    | C3     | 0.08   | 0.01 |
| C4                   | N2   | C3    | C2     | 1.19   | 0.01 |
| C4                   | N2   | C3    | H3     | 178.79 | 0.01 |
| C3                   | N2   | C4    | C1     | 0.84   | 0.01 |
| C3                   | N2   | C4    | H4     | 179.17 | 0.01 |
| C5                   | N3   | C1    | N1     | 5.38   | 0.01 |
| C5                   | N3   | C1    | C4     | 175.06 | 0.01 |
| C1                   | N3   | C5    | S1     | 2.22   | 0.01 |
| C1                   | N3   | C5    | N4     | 178.8  | 0.01 |
| C6                   | N4   | C5    | S1     | 1.3    | 0.01 |
| C6                   | N4   | C5    | N3     | 179.43 | 0.01 |
| C7                   | N4   | C5    | S1     | 179.89 | 0.01 |
| C7                   | N4   | C5    | N3     | 0.61   | 0.01 |

|     |     |     |     |        |      |
|-----|-----|-----|-----|--------|------|
| C5  | N4  | C6  | S1  | 1.25   | 0.01 |
| C5  | N4  | C6  | H6A | 114.61 | 0.01 |
| C5  | N4  | C6  | H6B | 117.11 | 0.01 |
| C7  | N4  | C6  | S1  | 179.86 | 0.01 |
| C7  | N4  | C6  | H6A | 64.28  | 0.01 |
| C7  | N4  | C6  | H6B | 64     | 0.01 |
| C5  | N4  | C7  | C8  | 3.47   | 0.01 |
| C5  | N4  | C7  | C12 | 177.62 | 0.01 |
| C6  | N4  | C7  | C8  | 177.99 | 0.01 |
| C6  | N4  | C7  | C12 | 0.92   | 0.01 |
| N1  | C1  | C4  | N2  | 2.58   | 0.01 |
| N1  | C1  | C4  | H4  | 177.44 | 0.01 |
| N3  | C1  | C4  | N2  | 176.99 | 0.01 |
| N3  | C1  | C4  | H4  | 3      | 0.01 |
| N1  | C2  | C3  | N2  | 1.65   | 0.01 |
| N1  | C2  | C3  | H3  | 178.33 | 0.01 |
| H2  | C2  | C3  | N2  | 178.34 | 0.01 |
| H2  | C2  | C3  | H3  | 1.68   | 0.01 |
| N4  | C7  | C8  | H8  | 0.79   | 0.01 |
| N4  | C7  | C8  | C9  | 179.22 | 0.01 |
| C12 | C7  | C8  | H8  | 179.69 | 0.01 |
| C12 | C7  | C8  | C9  | 0.32   | 0.01 |
| N4  | C7  | C12 | C11 | 178.86 | 0.01 |
| N4  | C7  | C12 | H12 | 1.14   | 0.01 |
| C8  | C7  | C12 | C11 | 0.08   | 0.01 |
| C8  | C7  | C12 | H12 | 179.92 | 0.01 |
| C7  | C8  | C9  | H9  | 179.71 | 0.01 |
| C7  | C8  | C9  | C10 | 0.3    | 0.01 |
| H8  | C8  | C9  | H9  | 0.28   | 0.01 |
| H8  | C8  | C9  | C10 | 179.71 | 0.01 |
| C8  | C9  | C10 | H10 | 179.87 | 0.01 |
| C8  | C9  | C10 | C11 | 0.11   | 0.01 |
| H9  | C9  | C10 | H10 | 0.14   | 0.01 |
| H9  | C9  | C10 | C11 | 179.88 | 0.01 |
| C9  | C10 | C11 | H11 | 179.45 | 0.01 |
| C9  | C10 | C11 | C12 | 0.51   | 0.01 |
| H10 | C10 | C11 | H11 | 0.57   | 0.01 |
| H10 | C10 | C11 | C12 | 179.47 | 0.01 |
| C10 | C11 | C12 | C7  | 0.49   | 0.01 |
| C10 | C11 | C12 | H12 | 179.51 | 0.01 |
| H11 | C11 | C12 | C7  | 179.47 | 0.01 |
| H11 | C11 | C12 | H12 | 0.53   | 0.01 |
| C18 | S2  | C17 | N7  | 179.83 | 0.01 |
| C18 | S2  | C17 | N8  | 0.75   | 0    |
| C17 | S2  | C18 | N8  | 0.7    | 0    |



|     |     |     |      |        |      |
|-----|-----|-----|------|--------|------|
| C17 | S2  | C18 | H18A | 115.18 | 0.01 |
| C17 | S2  | C18 | H18B | 116.57 | 0.01 |
| C14 | N5  | C13 | N7   | 176.22 | 0.01 |
| C14 | N5  | C13 | C16  | 3.37   | 0.01 |
| C13 | N5  | C14 | H14  | 179.56 | 0.01 |
| C13 | N5  | C14 | C15  | 0.43   | 0.01 |
| C16 | N6  | C15 | C14  | 2.53   | 0.01 |
| C16 | N6  | C15 | H15  | 177.47 | 0.01 |
| C15 | N6  | C16 | C13  | 0.46   | 0.01 |
| C15 | N6  | C16 | H16  | 179.54 | 0.01 |
| C17 | N7  | C13 | N5   | 7.02   | 0.01 |
| C17 | N7  | C13 | C16  | 173.38 | 0.01 |
| C13 | N7  | C17 | S2   | 2.8    | 0.01 |
| C13 | N7  | C17 | N8   | 178.37 | 0.01 |
| C18 | N8  | C17 | S2   | 0.92   | 0.01 |
| C18 | N8  | C17 | N7   | 179.9  | 0.01 |
| C19 | N8  | C17 | S2   | 179.58 | 0.01 |
| C19 | N8  | C17 | N7   | 0.41   | 0.01 |
| C17 | N8  | C18 | S2   | 0.89   | 0.01 |
| C17 | N8  | C18 | H18A | 114.99 | 0.01 |
| C17 | N8  | C18 | H18B | 116.76 | 0.01 |
| C19 | N8  | C18 | S2   | 179.59 | 0.01 |
| C19 | N8  | C18 | H18A | 64.53  | 0.01 |
| C19 | N8  | C18 | H18B | 63.72  | 0.01 |
| C17 | N8  | C19 | C20  | 176.25 | 0.01 |
| C17 | N8  | C19 | C24  | 4.47   | 0.01 |
| C18 | N8  | C19 | C20  | 3.12   | 0.01 |
| C18 | N8  | C19 | C24  | 176.15 | 0.01 |
| N5  | C13 | C16 | N6   | 3.56   | 0.01 |
| N5  | C13 | C16 | H16  | 176.44 | 0.01 |
| N7  | C13 | C16 | N6   | 176.05 | 0.01 |
| N7  | C13 | C16 | H16  | 3.95   | 0.01 |
| N5  | C14 | C15 | N6   | 2.67   | 0.01 |
| N5  | C14 | C15 | H15  | 177.33 | 0.01 |
| H14 | C14 | C15 | N6   | 177.33 | 0.01 |
| H14 | C14 | C15 | H15  | 2.67   | 0.01 |
| N8  | C19 | C20 | H20  | 1.11   | 0.01 |
| N8  | C19 | C20 | C21  | 178.89 | 0.01 |
| C24 | C19 | C20 | H20  | 179.6  | 0.01 |
| C24 | C19 | C20 | C21  | 0.4    | 0.01 |
| N8  | C19 | C24 | C23  | 179.27 | 0.01 |
| N8  | C19 | C24 | H24  | 0.72   | 0.01 |
| C20 | C19 | C24 | C23  | 0      | 0.01 |
| C20 | C19 | C24 | H24  | 180    | 0.01 |
| C19 | C20 | C21 | H21  | 179.78 | 0.01 |

|                                  |                              |                                       |                                                    |        |      |
|----------------------------------|------------------------------|---------------------------------------|----------------------------------------------------|--------|------|
| C19                              | C20                          | C21                                   | C22                                                | 0.24   | 0.01 |
| H20                              | C20                          | C21                                   | H21                                                | 0.22   | 0.01 |
| H20                              | C20                          | C21                                   | C22                                                | 179.76 | 0.01 |
| C20                              | C21                          | C22                                   | H22                                                | 179.65 | 0.01 |
| C20                              | C21                          | C22                                   | C23                                                | 0.32   | 0.01 |
| H21                              | C21                          | C22                                   | H22                                                | 0.37   | 0.01 |
| H21                              | C21                          | C22                                   | C23                                                | 179.66 | 0.01 |
| C21                              | C22                          | C23                                   | H23                                                | 179.27 | 0.01 |
| C21                              | C22                          | C23                                   | C24                                                | 0.73   | 0.01 |
| H22                              | C22                          | C23                                   | H23                                                | 0.76   | 0.01 |
| H22                              | C22                          | C23                                   | C24                                                | 179.24 | 0.01 |
| C22                              | C23                          | C24                                   | C19                                                | 0.57   | 0.01 |
| C22                              | C23                          | C24                                   | H24                                                | 179.43 | 0.01 |
| H23                              | C23                          | C24                                   | C19                                                | 179.43 | 0.01 |
| H23                              | C23                          | C24                                   | H24                                                | 0.58   | 0.01 |
| Number of torsion angles: 126    |                              |                                       |                                                    |        |      |
| Possible hydrogen bonds          |                              |                                       |                                                    |        |      |
| Donor-H                          | Donor...Acceptor             | H...Acceptor                          | Donor-H.....Acceptor                               |        |      |
| C8 -H8<br>0.930(.000)<br>1.080   | C8 ...N3<br>3.042(.000) (0)  | H8 ...N3<br>2.416(.000) (0)<br>2.334  | C8 -H8 ...N3 (0)<br>124.55( 0.01)<br>121.52 (**)   |        |      |
| C8 -H8<br>0.930(.000)<br>1.080   | C8 ...S2 (1)<br>3.657(.000)  | H8 ...S2 (1)<br>2.958(.000)<br>2.858  | C8 -H8 ...S2 (1)<br>133.09( 0.01)<br>130.90 (**)   |        |      |
| C9 -H9<br>0.930(.000)<br>1.080   | C9 ...N6 (2)<br>3.776(.000)  | H9 ...N6 (2)<br>2.965(.000)<br>2.841  | C9 -H9 ...N6 (2)<br>146.59( 0.01)<br>144.92 (**)   |        |      |
| C11 -H11<br>0.930(.000)<br>1.080 | C11 ...N2 (3)<br>3.588(.000) | H11 ...N2 (3)<br>2.682(.000)<br>2.537 | C11 -H11 ...N2 (3)<br>164.96( 0.01)<br>164.08 (**) |        |      |
| C15 -H15<br>0.930(.000)<br>1.080 | C15 ...N6 (4)<br>3.436(.000) | H15 ...N6 (4)<br>2.705(.000)<br>2.599 | C15 -H15 ...N6 (4)<br>136.11( 0.01)<br>133.81 (**) |        |      |
| C22 -H22<br>0.930(.000)<br>1.080 | C22 ...N1 (5)<br>3.636(.000) | H22 ...N1 (5)<br>2.951(.000)<br>2.854 | C22 -H22 ...N1 (5)<br>131.67( 0.01)<br>129.42 (**) |        |      |
| C23 -H23<br>0.930(.000)<br>1.080 | C23 ...N2 (6)<br>3.768(.000) | H23 ...N2 (6)<br>2.996(.000)<br>2.880 | C23 -H23 ...N2 (6)<br>141.39( 0.01)<br>139.53 (**) |        |      |
| C24 -H24<br>0.930(.000)<br>1.080 | C24 ...S1 (7)<br>3.605(.000) | H24 ...S1 (6)<br>2.875(.000)<br>2.769 | C24 -H24 ...S1 (7)<br>136.27( 0.01)<br>134.12 (**) |        |      |

Table 2. Comparison of structural parameters obtained from crystal structure and computed data

| Parameter            |                                                                  | Crystal structure | Computed Data |
|----------------------|------------------------------------------------------------------|-------------------|---------------|
| Bond length (nm)     | C <sub>6</sub> -N <sub>4</sub>                                   | 1.39              | 1.36          |
|                      | N <sub>4</sub> -C <sub>13</sub>                                  | 1.27              | 1.27          |
|                      | C <sub>13</sub> -S <sub>1</sub>                                  | 1.77              | 1.82          |
|                      | S <sub>1</sub> -C <sub>14</sub>                                  | 1.84              | 1.85          |
|                      | C <sub>14</sub> -N <sub>5</sub>                                  | 1.46              | 1.46          |
|                      | N <sub>5</sub> -C <sub>13</sub>                                  | 1.36              | 1.36          |
|                      | N <sub>5</sub> -C <sub>17</sub>                                  | 1.40              | 1.42          |
| Bond angle (deg)     | C <sub>6</sub> -N <sub>4</sub> -C <sub>13</sub>                  | 118.73            | 127.19        |
|                      | N <sub>4</sub> -C <sub>13</sub> -S <sub>1</sub>                  | 135.54            | 136.75        |
|                      | C <sub>13</sub> -S <sub>1</sub> -C <sub>14</sub>                 | 74.00             | 72.79         |
|                      | S <sub>1</sub> -C <sub>14</sub> -N <sub>5</sub>                  | 89.700            | 90.67         |
|                      | C <sub>14</sub> -N <sub>5</sub> -C <sub>13</sub>                 | 100.68            | 101.27        |
|                      | N <sub>5</sub> -C <sub>13</sub> -S <sub>1</sub>                  | 95.60             | 95.27         |
| Dihedral angle (deg) | N <sub>4</sub> -C <sub>13</sub> -S <sub>1</sub> -C <sub>14</sub> | 179.83            | 177.79        |

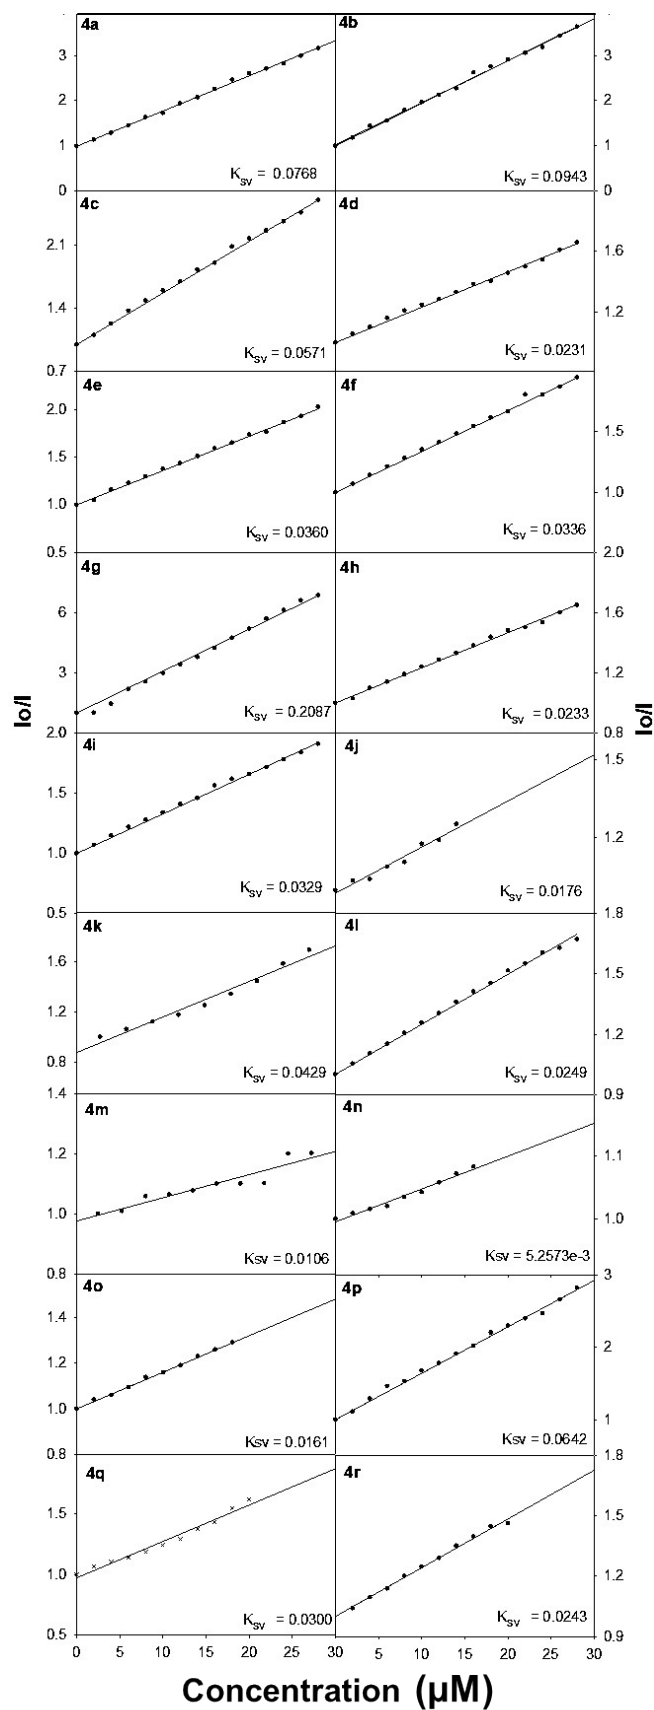

S1: Stern-Volmer plot for various 1,3 – thiazetidine derivatives.

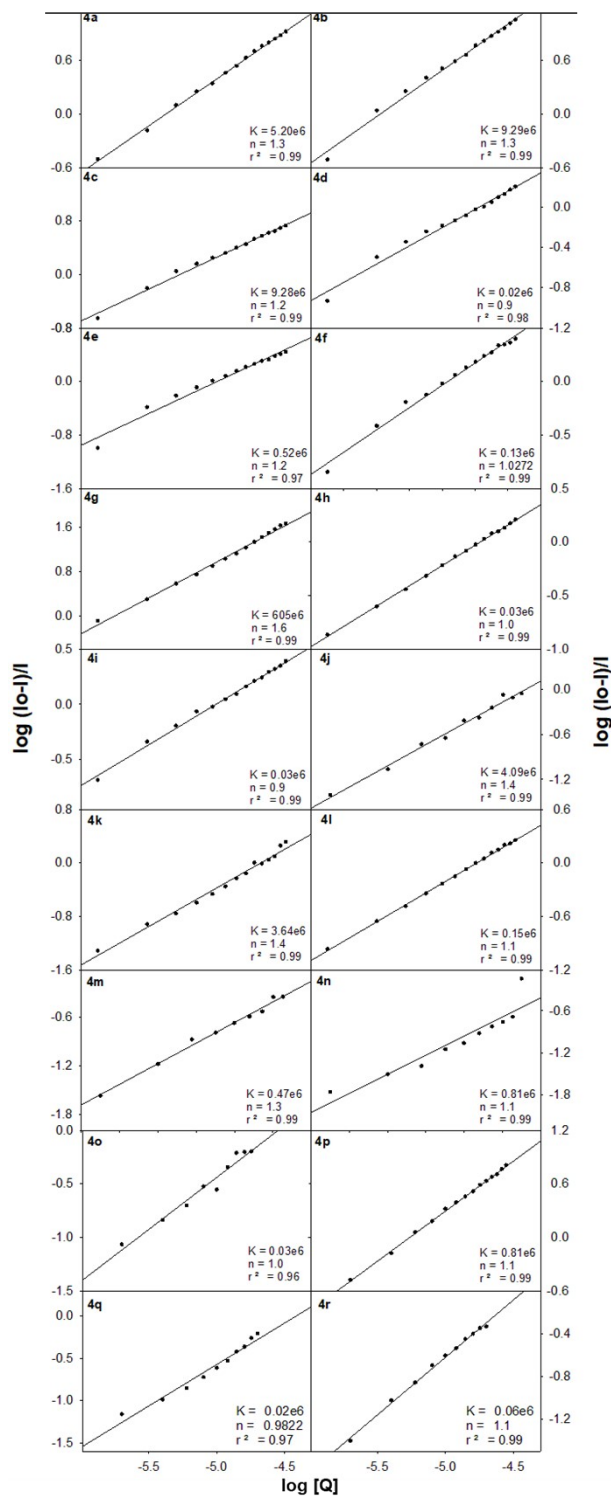

Figure S2: The plot of  $\log (I_0 - I)/I$  against  $\log [Q]$  for various thiazetidine derivatives (4a-r).

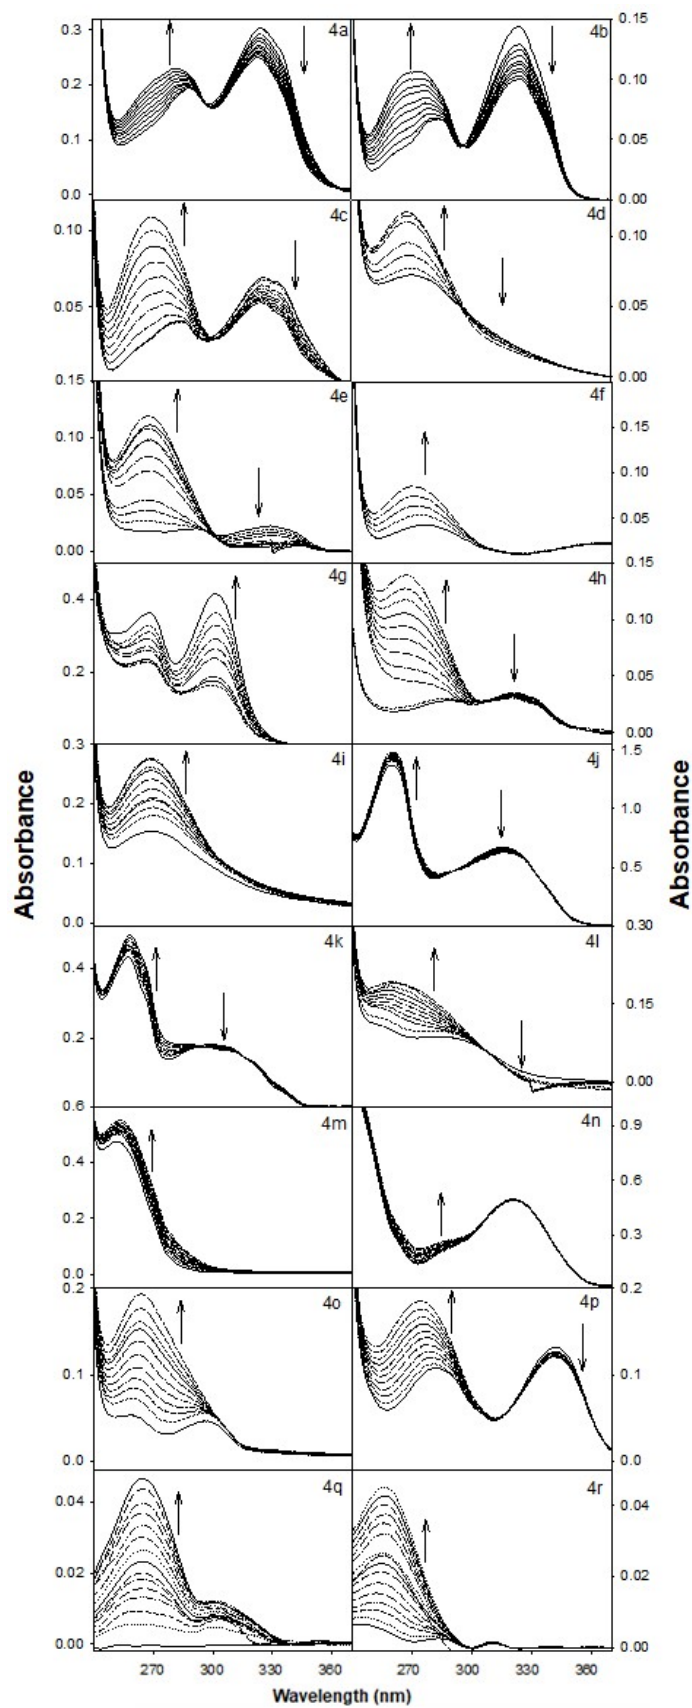

Figure S3. UV-Vis absorption spectra depicting the interaction of calf thymus DNA with various 1,3-thiazetidine derivatives **4a-r**.

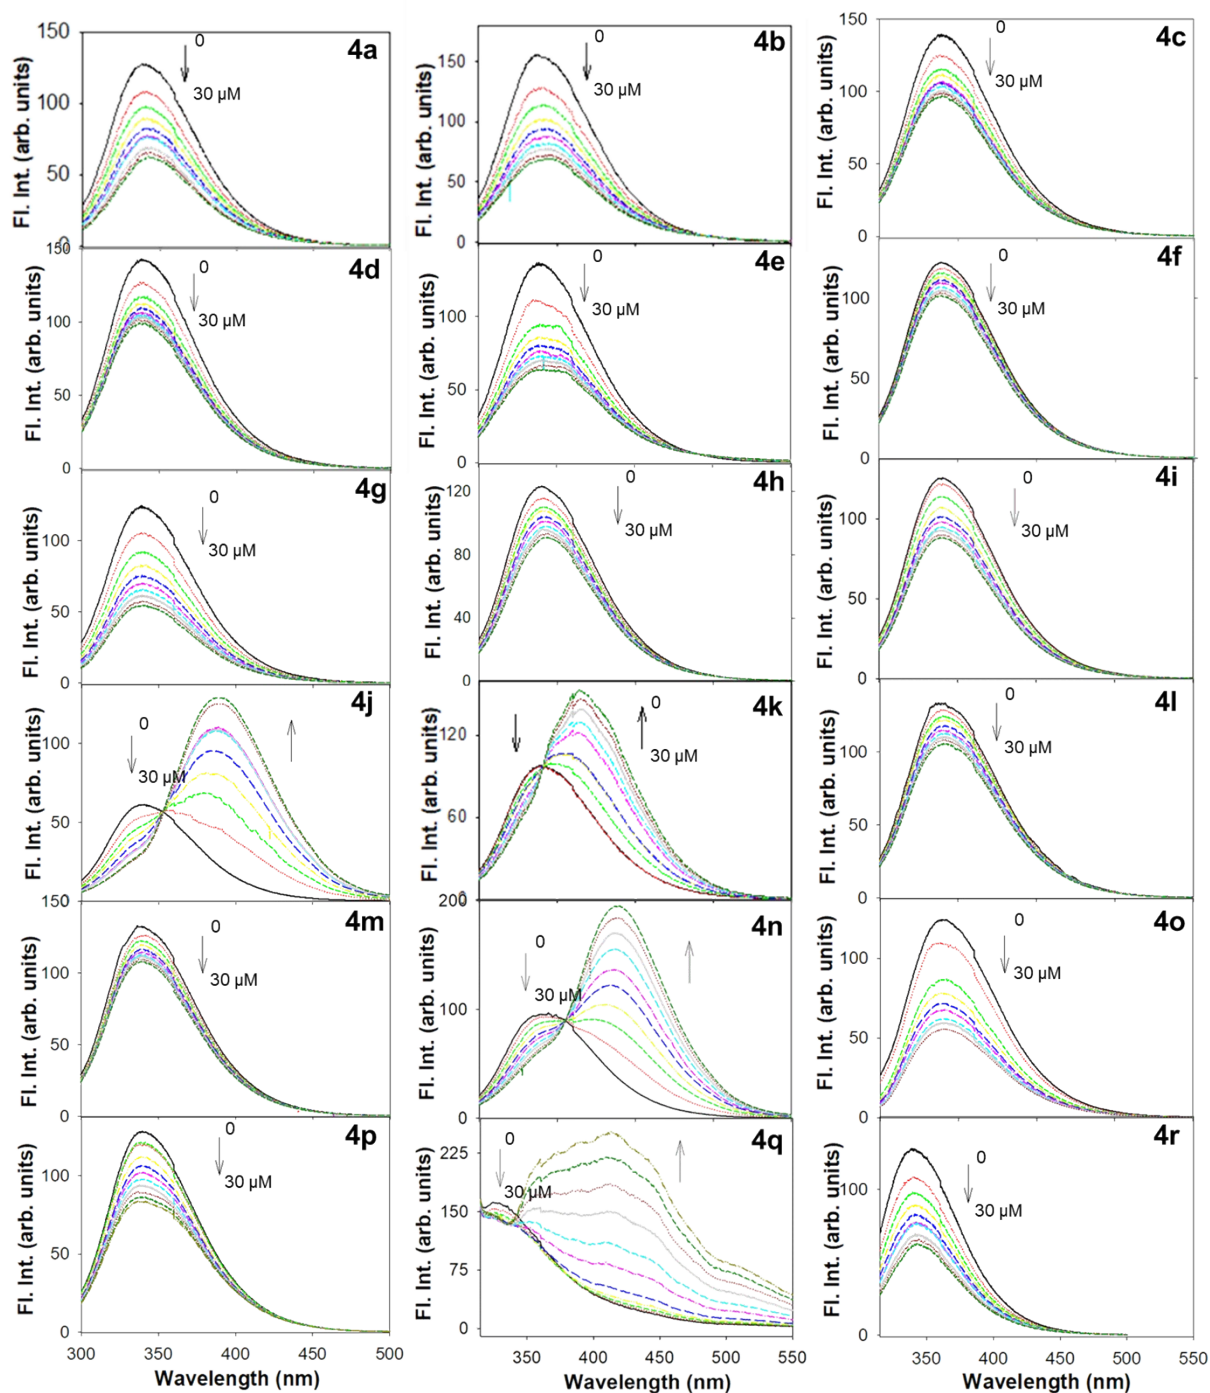

**Figure S4:** Fluorescence quenching plots. Fluorescence emission spectra ( $\lambda_{\text{ex}}$ : 280 nm) of BSA depicting the decrease in fluorescence intensity upon interaction with various thiazetidine derivatives

### **Experimental procedures for the binding of 1,3-thiazetidines with biomolecules.**

A 10 mM stock solution of BSA was prepared in 50 mM phosphate buffer (pH 7.2) and stored at 4 °C until used. The quenching interactions of thiazetidines with BSA were monitored by change in their intrinsic fluorescence at a fixed excitation wave length of 285 nm and emission value at 345 nm. The same emission and excitation scan rates and slit widths were maintained throughout the experiments. Fixed protein concentration (1 μM) was used to titrate against different concentrations of various thiazetidine derivatives (0 - 30 μM).

In order to determine the binding interactions of the newly synthesized thiazetidine derivatives with ct-DNA, absorption spectral titration was carried out in 5 mM Tris-HCl buffer, pH-7.2. The protein free form of ct-DNA was confirmed by the ratio of UV absorbance at 260 and 280 nm ( $A_{260}/A_{280}$ ) of *ca.* 1.8. The concentration of ct-DNA per nucleotide was determined by its molar absorption coefficient ( $6600 \text{ m}^{-1}$ ) at 260 nm.<sup>33</sup> Stock solutions of samples were prepared in DMSO and further dilutions were made in 5 mM Tris-HCl buffer. The binding experiments were carried out with fixed concentration of the samples (20 μM) and increasing concentrations of ct-DNA (0 – 30 μM) in both reference and sample solution to nullify the absorbance peak of ct-DNA.
